# Supplementary material for: Choosing Wisely: Prevalence and Correlates of Low-Value Health Care Services in the United States
Source: Springer Nature journal article supplement (doi:10.1007/s11606-014-3070-z), 2014-11-06
Supplement: MOESM2 [file 11606_2014_3070_MOESM2_ESM.docx]

**Appendix 2 – Measure Definitions**

**Choosing Wisely: Prevalence and Correlates of**

**Low-Value Health Care Services in the United States**

Carrie H Colla, Nancy E Morden, Thomas D Sequist, William L Schpero, Meredith B Rosenthal

**Table of Contents**

*Methods for Measuring Low-Value Diagnostic Services*

[Back Pain Imaging](#_Don't_do_imaging) (pp. 2)

[Benign Prostatic Hyperplasia Imaging](#_Don’t_order_upper-tract) (pp. 5)

[Cardiac Screening](#_Don't_order_cardiac) (pp. 7)

[Cervical Cancer Screening](#_Don’t_screen_women) (pp. 73)

[Dual-Energy X-ray Absorptiometry (DXA) Testing](#_Don’t_routinely_repeat_1) (pp. 75)

[Preoperative Cardiac Testing (cataract surgery)](#_Don't_perform_preoperative) (pp. 77)

[Preoperative Cardiac Testing (non-cardiac surgery)](#_Don't_perform_preoperative_1) (pp. 171)

[Vitamin D Screening](#_Don’t_perform_population) (pp. 175)

*Methods for Measuring Low-Value Treatments*

[Antipsychotics in Dementia Patients](#_Don’t_use_antipsychotics) (pp. 178)

[Feeding Tubes in Dementia Patients](#_Don’t_recommend_percutaneous) (pp. 181)

[Opioids for Migraines](#_Don’t_use_opioid) (pp. 184)

**Abbreviations**

BETOS: Berenson-Eggers Type of Service

CPT: Current Procedural Terminology

CCS: Clinical Classifications Software

HCC: Hierarchical Condition Categories

ICD-9: International Statistical Classification of Diseases, Ninth Edition

# Don't do imaging for low back pain when no red flags are present

*Choosing Wisely Guidelines*

| **American Academy of Family Physicians** | Don’t do imaging for low back pain within the first six weeks, unless red flags are present. Red flags include, but are not limited to, severe or progressive neurological deficits or when serious underlying conditions such as osteomyelitis are suspected. Imaging of the lower spine before six weeks does not improve outcomes, but does increase costs. Low back pain is the fifth most common reason for all physician visits. |
| --- | --- |
| **American College of Physicians** | Don’t obtain imaging studies in patients with non-specific low back pain. In patients with back pain that cannot be attributed to a specific disease or spinal abnormality following a history and physical examination (e.g., non-specific low back pain), imaging with plain radiography, computed tomography (CT) scan, or magnetic resonance imaging (MRI) does not improve patient outcomes. |
| **North American Spine Society** | Don’t recommend advanced imaging (e.g., MRI) of the spine within the first six weeks in patients with non-specific acute low back pain in the absence of red flags. In the absence of red flags, advanced imaging within the first six weeks has not been found to improve outcomes, but does increase costs. Red flags include, but are not limited to: trauma history, unintentional weight loss, immunosuppression, history of cancer, intravenous drug use, steroid use, osteoporosis, age > 50, focal neurologic deficit and progression of symptoms. |

*Methods*

We calculated the percent of Medicare beneficiaries over age 65 with any low back pain who received imaging within the first six weeks, with no red flags present, in each calendar year 2007-11. We then created a weighted average of imaging prevalence for the interval 2007-11. We required full fee-for-service Medicare Parts A and B coverage in the 12 months before the back pain diagnosis, as well as in the six weeks after. Red flags included a previous low back pain diagnosis, a cancer (excluding non-melanoma skin cancer) diagnosis at any point during the study period, or a diagnosis with an “E” code (external causes of injury), trauma, neurological impairment, IV drug use, HIV, unspecified immune deficiencies, or intraspinal abscess within the 12 months before the imaging event. For beneficiaries to be classified as having a red flag, we required at least two physician claims and/or at least one acute hospital claim (we only required one claim for the “E” code and trauma diagnoses). We also did not count imaging events that included an “E” code or trauma diagnosis in any of the first four fields on a claim. Procedure and diagnosis codes used for this measure were adapted, in part, from the National Quality Forum-endorsed National Voluntary Consensus Standards for Physician-Focused Ambulatory Care and the Centers for Medicare and Medicaid Services Hospital Outpatient Quality Reporting Specifications Manual.

*References*

NQF-Endorsed National Voluntary Consensus Standards for Physician-Focused Ambulatory Care. National Committee for Quality Assurance. 2008.

Hospital Outpatient Quality Reporting Specifications Manual. Centers for Medicare & Medicaid Services. 2008.

*ICD-9 Codes for Identifying Low Back Pain*

| **Label** | **Code** |
| --- | --- |
| Lumbosacral spondylosis without myelopathy | 721.3 |
| Spondylosis of unspecified site without mention of myelopathy | 721.90 |
| Displacement of lumbar intervertebral disc without myelopathy | 722.10 |
| Schmorl's nodes lumbar region | 722.32 |
| Degeneration of lumbar or lumbosacral intervertebral disc | 722.52 |
| Degeneration of intervertebral disc, site unspecified | 722.6 |
| Other unspecified disc disorder of lumbar region | 722.93 |
| Lumbago | 724.2 |
| Sciatica | 724.3 |
| Unspecified backache | 724.5 |
| Disorders of sacrum | 724.6 |
| Unspecified disorder of coccyx | 724.70 |
| Hypermobility of coccyx | 724.71 |
| Other disorder of the coccyx | 724.79 |
| Other acquired deformity of back or spine | 738.5 |
| Non-allopathic lesion of lumbar region, not elsewhere classified | 739.3 |
| Non-allopathic lesion of sacral regions, not elsewhere classified | 739.4 |
| Sprain and strain of lumbosacral (joint) (ligament) | 846.0 |
| Sprain and strain of sacroiliac (ligament) | 846.1 |
| Sprain and strain of sacrospinatus (ligament) | 846.2 |
| Sprain and strain of sacrotuberous (ligament) | 846.3 |
| Other specified sites of sacroiliac region sprain and strain | 846.8 |
| Unspecified site of sacroiliac region sprain and strain | 846.9 |
| Lumbar sprain and strain | 847.2 |

*ICD-9 and CCS Codes for Identifying Red Flags*

| **Label** | **Code** |
| --- | --- |
| External causes of injury | Any ICD-9 “E” code |
| Trauma | ICD-9 800, 839, 850-854, 860-869, 905-909, 926.11, 926.12, 929, 952, 958-959 |
| Cancer | CCS 11-22, 24-44 |
| IV drug abuse | ICD-9 304.0, 304.1X, 304.2X, 304.4X, 305.4X, 305.5X, 305.6X, 305.7X |
| Neurologic Impairment | ICD-9 344.60, 729.2 |
| Human Immunodeficiency Virus (HIV) | ICD-9 042-044 |
| Unspecified immune deficiencies | ICD-9 279.3 |
| Intraspinal abscess | ICD-9 324.9, 324.1 |

*CPT Codes for Identifying Imaging Events*

| **Label** | **Code** |
| --- | --- |
| X-Ray exam spine AP&LAT | 72010 |
| X-Ray exam of spine 1 view | 72020 |
| X-Ray exam L-S spine 2/3 VWS | 72100 |
| X-Ray exam lL2 spine 4/> VWS | 72110 |
| X-Ray exam L-S spine bending | 72114 |
| X-Ray bend only L-S spine | 72120 |
| X-Ray exam SI joints | 72200 |
| X-Ray exam SI joints 3/> VWS | 72202 |
| X-Ray exam sacrum tailbone | 72220 |
| MRI neck spine w/o dye | 72141 |
| MRI neck spine w/dye | 72142 |
| MRI chest spine w/o dye | 72146 |
| MRI chest spine w/dye | 72147 |
| MRI lumbar spine without contrast | 72148 |
| MRI lumbar spine with contrast | 72149 |
| MRI neck spine w/o & w/dye | 72156 |
| MRI lumbar spine with and without contrast | 72158 |
| CT lumbar spine w/o dye | 72131 |
| CT lumbar spine w/dye | 72132 |
| CT lumbar spine w/o & w/dye | 72133 |

# Don’t order upper-tract imaging for patients with benign prostatic hyperplasia (BPH)

*Choosing Wisely Guidelines*

| **American Urological Association** | Don’t order creatinine or upper-tract imaging for patients with benign prostatic hyperplasia (BPH). When an initial evaluation shows only the presence of lower urinary tract symptoms (LUTS), if the symptoms are not significantly bothersome to the patient or if the patient doesn’t desire treatment, no further evaluation is recommended. Such patients are unlikely to experience significant health problems in the future due to their condition and can be seen again if necessary. [While the patient can often tell the provider if the symptoms are bothersome enough that he desires additional therapy, another possible option is to use a validated questionnaire to assess symptoms. For example, if the patient completes the International Prostate Symptom Scale (IPSS) and has a symptom score of 8 or greater, this is considered to be “clinically” bothersome. |
| --- | --- |

*Methods*

We calculated the percent of male Medicare beneficiaries over age 65 with benign prostatic hyperplasia (BPH) who received upper urinary tract imaging within 60 days of their BPH diagnosis for each calendar year 2006-11. We then created a weighted average of imaging prevalence for the interval 2006-11. We required enrollment in fee-for-service Medicare Parts A and B within 60 days of the BPH diagnosis, which we identified using ICD-9 code 600.00. We only counted imaging events that included a diagnosis of BPH without lower urinary tract symptoms or other diagnoses that would not clinically indicate imaging in any of the first four fields on the imaging claim. We excluded beneficiaries who received “red flag” diagnoses within 60 days of the index BPH diagnosis that could appropriately indicate imaging or who had a diagnosis of cancer (except non-melanoma skin cancer) at any point during the calendar year. We also excluded beneficiaries who had more than $200 in hospice spending within 60 days of the index diagnosis. We required at least two physician claims and/or at least one acute hospital claim for all diagnoses.

*References*

Strope SA, Elliott SP, Saigal CS, Smith A, Wilt TJ, Wei JT. Urologist Compliance With AUA Best Practice Guidelines for Benign Prostatic Hyperplasia in Medicare Population. Urology. 2011;78(1):3-9. doi:http://dx.doi.org/10.1016/j.urology.2010.12.087

*CPT Codes for Identifying Imaging Events*

| **Label** | **Code** |
| --- | --- |
| Intravenous pyelogram | 74400, 74405, 74410-74425 |
| CT scan abdomen | 74150-74170 |
| MRI abdomen | 74181-74183 |
| Diagnostic ultrasound of abdomen | 76700, 76705, 76770, 76775 |

*ICD-9 Codes for Including Imaging Events*

| **Label** | **Code** |
| --- | --- |
| Hypertrophy (benign) of prostate without urinary obstruction and other lower urinary tract symptoms (LUTS) | 600.00 |
| Hypertrophy (benign) of prostate with urinary obstruction and other lower urinary tract symptoms (LUTS) | 600.01 |
| Hyperplasia of prostate, unspecified, with urinary obstruction and other lower urinary tract symptoms (LUTS) | 600.91 |
| Retention of urine, unspecified | 788.20 |
| Incomplete bladder emptying | 788.21 |
| Urinary incontinence, unspecified | 788.30 |
| Urge incontinence | 788.31 |
| Urinary frequency | 788.41 |
| Nocturia | 788.43 |
| Slowing of urinary stream | 788.62 |

*ICD-9 and HCC Codes for Identifying Beneficiaries with “Red Flags”*

| **Label** | **Code** |
| --- | --- |
| Chronic renal failure | ICD-9 403.01, 403.11, 403.91, 585.0-585.6, 585.9 |
| Nephritis, nephrotic syndrome, and nephrosis | ICD-9 580-589 |
| Other pyelonephritis or pyonephrosis not specified as acute or chronic | ICD-9 590.80, 590.81 |
| Calculus of kidney and ureter | ICD-9 592 |
| Kidney stones | ICD-9 592.0 |
| Urinary tract infections | ICD-9 599.0 |
| Hematuria | ICD-9 599.7x |
| Fever | ICD-9 780.6x |
| Urinary retention | ICD-9 788.2x |
| Abdominal pain | ICD-9 789.0x |
| Cancer, except non-melanoma skin cancer | HCC 7-10 |

# Don't order cardiac tests on low-risk, asymptomatic patients

*Choosing Wisely Guidelines*

| **American Academy of Family Physicians** | Don’t order annual electrocardiograms (EKGs) or any other cardiac screening for low-risk patients without symptoms. There is little evidence that detection of coronary artery stenosis in asymptomatic patients at low risk for coronary heart disease improves health outcomes. False-positive tests are likely to lead to harm through unnecessary invasive procedures, over-treatment and misdiagnosis. Potential harms of this routine annual screening exceed the potential benefit. |
| --- | --- |
| **American College of Cardiology** | Don’t perform stress cardiac imaging or advanced non-invasive imaging in the initial evaluation of patients without cardiac symptoms unless high-risk markers are present. Asymptomatic, low-risk patients account for up to 45 percent of unnecessary “screening.” Testing should be performed only when the following findings are present: diabetes in patients older than 40-years-old; peripheral arterial disease; or greater than 2 percent yearly risk for coronary heart disease events. |
| **American College of Cardiology** | Don’t perform annual stress cardiac imaging or advanced non-invasive imaging as part of routine follow-up in asymptomatic patients. Performing stress cardiac imaging or advanced non-invasive imaging in patients without symptoms on a serial or scheduled pattern (e.g., every one to two years or at a heart procedure anniversary) rarely results in any meaningful change in patient management. This practice may, in fact, lead to unnecessary invasive procedures and excess radiation exposure without any proven impact on patients’ outcomes. An exception to this rule would be for patients more than five years after a bypass operation. |
| **American College of Cardiology** | Don’t perform echocardiography as routine follow-up for mild, asymptomatic native valve disease in adult patients with no change in signs or symptoms. Patients with native valve disease usually have years without symptoms before the onset of deterioration. An echocardiogram is not recommended yearly unless there is a change in clinical status. |
| **American College of Physicians** | Don’t obtain screening exercise electrocardiogram testing in individuals who are asymptomatic and at low risk for coronary heart disease. In asymptomatic individuals at low risk for coronary heart disease (10-year risk <10%) screening for coronary heart disease with exercise electrocardiography does not improve patient outcomes. |
| **American Society of Echocardiography** | Avoid using stress echocardiograms on asymptomatic patients who meet “low risk” scoring criteria for coronary disease. Stress echocardiography is mostly used in symptomatic patients to assist in the diagnosis of obstructive coronary artery disease. There is very little information on using stress echocardiography in asymptomatic individuals for the purposes of cardiovascular risk assessment, as a stand-alone test or in addition to conventional risk factors. |
| **American Society of Nuclear Cardiology** | Don’t perform stress cardiac imaging or coronary angiography in patients without cardiac symptoms unless high-risk markers are present. Asymptomatic, low-risk patients account for up to 45 percent of inappropriate stress testing. Testing should be performed only when the following findings are present: diabetes in patients older than 40 years old, peripheral arterial disease, and greater than 2 percent yearly coronary heart disease event rate. |
| **American Society of Nuclear Cardiology** | Don’t perform cardiac imaging for patients who are at low risk. Chest pain patients at low risk of cardiac death and myocardial infarction (based on history, physical exam, electrocardiograms and cardiac biomarkers) do not merit stress radionuclide myocardial perfusion imaging or stress echocardiography as an initial testing strategy if they have a normal electrocardiogram (without baseline ST-abnormalities, left ventricular hypertrophy, pre-excitation, bundle branch block, intra-ventricular conduction delay, paced rhythm or on digoxin therapy) and are able to exercise. |
| **American Society of Nuclear Cardiology** | Don’t perform radionuclide imaging as part of routine follow-up in asymptomatic patients. Performing stress radionuclide imaging in patients without symptoms on a serial or scheduled pattern (e.g., every one to two years or at a heart procedure anniversary) rarely results in any meaningful change in patient management. This practice may lead to unnecessary invasive procedures and excess radiation exposure without any proven impact on patients’ outcomes. An exception to this rule would be for patients more than five years after a bypass operation. |
| **Society of Cardiovascular Computed Tomography** | Don’t order coronary artery calcium scoring for screening purposes on low risk asymptomatic individuals except for those with a family history of premature coronary artery disease. Net reclassification of risk by coronary artery calcium scoring, when added to clinical risk scoring, is least effective in low risk individuals. |

*Methods*

We calculated the percent of Medicare beneficiaries ages 66-80 with low cardiovascular risk who received a non-indicated electrocardiogram, cardiovascular stress test (including stress imaging), echocardiogram, or advanced cardiac imaging (CT, MRI, PET) in each calendar year 2006-11. We then created a weighted average of imaging prevalence for the interval 2006-11. We required enrollment in fee-for-service Medicare Parts A, B, and D for at least 11 months during the calendar year. We used HCC ICD-9 code lists to exclude beneficiaries at high risk for cardiac disease, requiring at least two physician claims or one acute hospital claim. We also assigned high-risk status using Part D prescription fill records and hospice billing: those patients with more than $200 in annual hospice billing were excluded from the low-risk cohort. We did not count testing events if diagnosis codes in any of the first four fields on a claim involved cardiac disease, cardiac-related symptoms, or any conditions that might justify the test (e.g., respiratory conditions, cancer).

*References*

Physician Quality Reporting System (PQRS) Measure Specifications Manual for Claims and Registry Reporting of Individual Measures. Centers for Medicare and Medicaid Services. 2014.

*HCC Codes For Identifying High-Risk Patients*

| **Label** | **Code** |
| --- | --- |
| HIV / AIDS | 1 |
| Cancer | 7-10 |
| Diabetes | 15-19 |
| Drug / Alcohol Dependence | 52 |
| Cardio-Respiratory Failure and Shock | 79 |
| Congestive Heart Failure | 80 |
| Acute Myocardial Infarction | 81 |
| Unstable Angina and Other Acute Ischemic Heart Disease | 82 |
| Angina Pectoris / Old Myocardial Infarction | 83 |
| Specified Heart Arrhythmias | 92 |
| Ischemic or Unspecified Stroke | 96 |
| Hemiplegia / Hemiparesis | 100 |
| Vascular Disease with Complications | 104 |
| Vascular Disease | 105 |
| Chronic Obstructive Pulmonary Disease | 108 |
| Renal Failure | 113 |

*Drug Codes For Identifying High-Risk Patients*

| **Label** | **Code** |
| --- | --- |
| Anticoagulants | D00519 D04136 D04698 D04744 D07137 D03812 D04114 D04865 D03889 D03041 D04786 D00252 D07385 D04291 D07356 D04659 D00022 |
| Platelet Aggregation Inhibitors | D03811 D04382 D04258 D00213 D04316 D07409 D07721 D00514 D04315 |
| Anti-Anginal Agents | D00666 D00268 D00269 D00321 D05719 |
| Diabetic Agents | D00393 D00394 D03846 D00162 D00042 D05529 D03864 D00246 D00248 D07767 D07466 D03807 D04110 D04743 D04442 D05488 D04267 D04434 D07467 D05896 D04122 D07963 D04697 D05436 D04538 D05278 D05765 D04370 D04373 D04369 D04371 D04372 |
| Peripheral Vasodilators | D00213 D00902 D00693 |

*CPT Codes for Identifying Cardiac Tests*

| **Label** | **Code** |
| --- | --- |
| Advanced Imaging  (CT, MRI, PET) | 0144T 0145T 0146T 0147T 0148T 0149T 0150T 75552 75553 75554 75555 75556 75557 75558 75559 75561 75562 75565 75571 75572 75573 75574 78451 78452 78453 78454 78460 78461 78464 78465 78478 78480 78459 78481 78483 78491 78492 78494 78496 78499 |
| Cardiovascular Stress Test | 75560 75563 75564 93015 93016 93017 93018 93024 93350 93351 93352 |
| Echocardiogram | 93303 93304 93306 93307 93308 93320 93321 93325 |
| Electrocardiogram | 3120F 93000 93005 93010 G0366 G0367 G0368 G0403 G0404 G0405 |

*ICD-9 Codes for Excluding Advanced Imaging (CT, MRI, PET)*

Advanced imaging tests were excluded from the analysis if the associated primary, secondary, tertiary, or quaternary diagnosis involved: (i) cardiac conditions; (ii) respiratory conditions, except acute respiratory infections (e.g. pneumonia); (iii) acute central nervous system conditions, except headaches; (iv) all thoracic and non-thoracic arterial conditions, but not peripheral venous conditions such as deep venous thrombosis; (v) malignant hypertension; (vi) end stage renal disease and acute renal disease; (vii) abdominal pain; (viii) cancer; (ix) drug toxicity or poisoning; or (x) exertional stress and fatigue.

| **Label** | **Code** |
| --- | --- |
| Unspecified septicemia | 0389 |
| Sarcoidosis | 135 |
| Malignant neoplasm of upper lobe, bronchus, or lung | 1623 |
| Malignant neoplasm of bronchus and lung, unspecified site | 1629 |
| Malignant neoplasm of breast (female), unspecified site | 1749 |
| Malignant neoplasm of prostate | 185 |
| Fluid overload | 2766 |
| Mitral stenosis | 3940 |
| Rheumatic mitral insufficiency | 3941 |
| Mitral stenosis with insufficiency | 3942 |
| Other and unspecified mitral valve diseases | 3949 |
| Rheumatic aortic stenosis | 3950 |
| Rheumatic aortic insufficiency | 3951 |
| Rheumatic aortic stenosis with insufficiency | 3952 |
| Other and unspecified rheumatic aortic diseases | 3959 |
| Mitral valve stenosis and aortic valve stenosis | 3960 |
| Mitral valve stenosis and aortic valve insufficiency | 3961 |
| Mitral valve insufficiency and aortic valve stenosis | 3962 |
| Mitral valve insufficiency and aortic valve insufficiency | 3963 |
| Multiple involvement of mitral and aortic valves | 3968 |
| Unspecified mitral and aortic valve diseases | 3969 |
| Diseases of tricuspid valve | 3970 |
| Rheumatic heart failure (congestive) | 39891 |
| Essential hypertension, malignant | 4010 |
| Malignant hypertensive heart disease without heart failure | 40200 |
| Malignant hypertensive heart disease with heart failure | 40201 |
| Benign hypertensive heart disease without heart failure | 40210 |
| Benign hypertensive heart disease with heart failure | 40211 |
| Unspecified hypertensive heart disease without heart failure | 40290 |
| Hypertensive heart disease, unspecified, with heart failure | 40291 |
| Hypertensive heart and chronic kidney disease, malignant, without heart failure and with chronic kidney disease stage I-IV | 40400 |
| Hypertensive heart and chronic kidney disease, malignant, with heart failure and with chronic kidney disease stage I-IV | 40401 |
| Hypertensive heart and chronic kidney disease, benign, without heart failure and with chronic kidney disease stage I-IV | 40410 |
| Hypertensive heart and chronic kidney disease, benign, without heart failure and with chronic kidney disease stage V | 40412 |
| Hypertensive heart and chronic kidney disease, benign, with heart failure and with chronic kidney disease stage V | 40413 |
| Hypertensive heart and chronic kidney disease, unspecified, without heart failure and with chronic kidney disease stage I-IV | 40490 |
| Hypertensive heart and chronic kidney disease, unspecified, with heart failure and with chronic kidney disease stage I-IV | 40491 |
| Hypertensive heart and chronic kidney disease, unspecified, without heart failure and with chronic kidney disease stage V | 40492 |
| Hypertensive heart and chronic kidney disease, unspecified, with heart failure and with chronic kidney disease stage V | 40493 |
| Acute myocardial infarction of anterolateral wall, episode of care unspecified | 41000 |
| Acute myocardial infarction of anterolateral wall, initial episode of care | 41001 |
| Acute myocardial infarction of anterolateral wall, subsequent episode of care | 41002 |
| Acute myocardial infarction of other anterior wall, episode of care unspecified | 41010 |
| Acute myocardial infarction of other anterior wall, initial episode of care | 41011 |
| Acute myocardial infarction of other anterior wall, subsequent episode of care | 41012 |
| Acute myocardial infarction of inferolateral wall, episode of care unspecified | 41020 |
| Acute myocardial infarction of inferolateral wall, initial episode of care | 41021 |
| Acute myocardial infarction of inferolateral wall, subsequent episode of care | 41022 |
| Acute myocardial infarction of inferoposterior wall, episode of care unspecified | 41030 |
| Acute myocardial infarction of inferoposterior wall, initial episode of care | 41031 |
| Acute myocardial infarction of inferoposterior wall, subsequent episode of care | 41032 |
| Acute myocardial infarction of other inferior wall, episode of care unspecified | 41040 |
| Acute myocardial infarction of other inferior wall, initial episode of care | 41041 |
| Acute myocardial infarction of other inferior wall, subsequent episode of care | 41042 |
| Acute myocardial infarction of other lateral wall, episode of care unspecified | 41050 |
| Acute myocardial infarction of other lateral wall, initial episode of care | 41051 |
| Acute myocardial infarction of other lateral wall, subsequent episode of care | 41052 |
| Acute myocardial infarction, subendocardial infarction, episode of care unspecified | 41070 |
| Acute myocardial infarction, subendocardial infarction, initial episode of care | 41071 |
| Acute myocardial infarction, subendocardial infarction, subsequent episode of care | 41072 |
| Acute myocardial infarction of other specified sites, episode of care unspecified | 41080 |
| Acute myocardial infarction of other specified sites, initial episode of care | 41081 |
| Acute myocardial infarction of other specified sites, subsequent episode of care | 41082 |
| Acute myocardial infarction, unspecified site, episode of care unspecified | 41090 |
| Acute myocardial infarction, unspecified site, initial episode of care | 41091 |
| Acute myocardial infarction, unspecified site, subsequent episode of care | 41092 |
| Postmyocardial infarction syndrome | 4110 |
| Intermediate coronary syndrome | 4111 |
| Acute coronary occlusion without myocardial infarction | 41181 |
| Other acute and subacute form of ischemic heart disease | 41189 |
| Old myocardial infarction | 412 |
| Angina decubitus | 4130 |
| Prinzmetal angina | 4131 |
| Other and unspecified angina pectoris | 4139 |
| Coronary atherosclerosis of unspecified type of vessel, native or graft | 41400 |
| Coronary atherosclerosis of native coronary artery | 41401 |
| Coronary atherosclerosis of autologous vein bypass graft | 41402 |
| Coronary atherosclerosis of nonautologous biological bypass graft | 41403 |
| Coronary atherosclerosis of artery bypass graft | 41404 |
| Coronary atherosclerosis of unspecified type of bypass graft | 41405 |
| Coronary atherosclerosis, of native coronary artery of transplanted heart | 41406 |
| Coronary atherosclerosis, of bypass graft (artery) (vein) of transplanted heart | 41407 |
| Aneurysm of heart | 41410 |
| Aneurysm of coronary vessels | 41411 |
| Other aneurysm of heart | 41419 |
| Chronic total occlusion of coronary artery | 4142 |
| Coronary atherosclerosis due to lipid rich plaque | 4143 |
| Other specified forms of chronic ischemic heart disease | 4148 |
| Unspecified chronic ischemic heart disease | 4149 |
| Iatrogenic pulmonary embolism and infarction | 41511 |
| Other pulmonary embolism and infarction | 41519 |
| Primary pulmonary hypertension | 4160 |
| Other chronic pulmonary heart diseases | 4168 |
| Unspecified chronic pulmonary heart disease | 4169 |
| Unspecified acute pericarditis | 42090 |
| Acute idiopathic pericarditis | 42091 |
| Acute and subacute bacterial endocarditis | 4210 |
| Other specified diseases of pericardium | 4238 |
| Unspecified disease of pericardium | 4239 |
| Mitral valve disorders | 4240 |
| Aortic valve disorders | 4241 |
| Tricuspid valve disorders, specified as nonrheumatic | 4242 |
| Pulmonary valve disorders | 4243 |
| Endocarditis, valve unspecified, unspecified cause | 42490 |
| Endomyocardial fibrosis | 4250 |
| Hypertrophic obstructive cardiomyopathy | 4251 |
| Other primary cardiomyopathies | 4254 |
| Alcoholic cardiomyopathy | 4255 |
| Cardiomyopathy in other diseases classified elsewhere | 4258 |
| Unspecified secondary cardiomyopathy | 4259 |
| Atrioventricular block, complete | 4260 |
| Unspecified atrioventricular block | 42610 |
| First degree atrioventricular block | 42611 |
| Mobitz (type) II atrioventricular block | 42612 |
| Other second degree atrioventricular block | 42613 |
| Left bundle branch hemiblock | 4262 |
| Other left bundle branch block | 4263 |
| Right bundle branch block | 4264 |
| Unspecified bundle branch block | 42650 |
| Right bundle branch block and left posterior fascicular block | 42651 |
| Right bundle branch block and left anterior fascicular block | 42652 |
| Other bilateral bundle branch block | 42653 |
| Other heart block | 4266 |
| Anomalous atrioventricular excitation | 4267 |
| Long QT syndrome | 42682 |
| Other specified conduction disorder | 42689 |
| Unspecified conduction disorder | 4269 |
| Paroxysmal supraventricular tachycardia | 4270 |
| Paroxysmal ventricular tachycardia | 4271 |
| Unspecified paroxysmal tachycardia | 4272 |
| Atrial fibrillation | 42731 |
| Atrial flutter | 42732 |
| Ventricular fibrillation | 42741 |
| Ventricular flutter | 42742 |
| Cardiac arrest | 4275 |
| Unspecified premature beats | 42760 |
| Supraventricular premature beats | 42761 |
| Other premature beats | 42769 |
| Sinoatrial node dysfunction | 42781 |
| Other specified cardiac dysrhythmias | 42789 |
| Unspecified cardiac dysrhythmia | 4279 |
| Congestive heart failure, unspecified | 4280 |
| Left heart failure | 4281 |
| Unspecified systolic heart failure | 42820 |
| Acute systolic heart failure | 42821 |
| Chronic systolic heart failure | 42822 |
| Acute on chronic systolic heart failure | 42823 |
| Unspecified diastolic heart failure | 42830 |
| Acute diastolic heart failure | 42831 |
| Chronic diastolic heart failure | 42832 |
| Acute on chronic diastolic heart failure | 42833 |
| Unspecified combined systolic and diastolic heart failure | 42840 |
| Acute combined systolic and diastolic heart failure | 42841 |
| Chronic combined systolic and diastolic heart failure | 42842 |
| Acute on chronic combined systolic and diastolic heart failure | 42843 |
| Unspecified heart failure | 4289 |
| Unspecified myocarditis | 4290 |
| Myocardial degeneration | 4291 |
| Unspecified cardiovascular disease | 4292 |
| Cardiomegaly | 4293 |
| Functional disturbances following cardiac surgery | 4294 |
| Acquired cardiac septal defect | 42971 |
| Other disorders of papillary muscle | 42981 |
| Hyperkinetic heart disease | 42982 |
| Other ill-defined heart disease | 42989 |
| Unspecified heart disease | 4299 |
| Occlusion and stenosis of carotid artery without mention of cerebral infarction | 43310 |
| Occlusion and stenosis of carotid artery with cerebral infarction | 43311 |
| Occlusion and stenosis of multiple and bilateral precerebral arteries without mention of c | 43330 |
| Cerebral embolism with cerebral infarction | 43411 |
| Unspecified cerebral artery occlusion without mention of cerebral infarction | 43490 |
| Unspecified cerebral artery occlusion with cerebral infarction | 43491 |
| Other specified transient cerebral ischemias | 4358 |
| Unspecified transient cerebral ischemia | 4359 |
| Acute, but ill-defined, cerebrovascular disease | 436 |
| Cerebral atherosclerosis | 4370 |
| Atherosclerosis of aorta | 4400 |
| Atherosclerosis of renal artery | 4401 |
| Atherosclerosis of native arteries of the extremities, unspecified | 44020 |
| Atherosclerosis of native arteries of the extremities with intermittent claudication | 44021 |
| Atherosclerosis of native arteries of the extremities with rest pain | 44022 |
| Atherosclerosis of native arteries of the extremities with ulceration | 44023 |
| Atherosclerosis of native arteries of the extremities with gangrene | 44024 |
| Atherosclerosis of other specified arteries | 4408 |
| Generalized and unspecified atherosclerosis | 4409 |
| Dissecting aortic aneurysm (any part), unspecified site | 44100 |
| Dissecting aortic aneurysm (any part), thoracic | 44101 |
| Dissecting aortic aneurysm (any part), abdominal | 44102 |
| Thoracic aneurysm without mention of rupture | 4412 |
| Abdominal aneurysm without mention of rupture | 4414 |
| Thoracoabdominal aneurysm without mention of rupture | 4417 |
| Aortic aneurysm of unspecified site without mention of rupture | 4419 |
| Other peripheral vascular disease | 44389 |
| Embolism and thrombosis of arteries of lower extremity | 44422 |
| Stricture of artery | 4471 |
| Other specified disorders of arteries and arterioles | 4478 |
| Unspecified disorders of arteries and arterioles | 4479 |
| Orthostatic hypotension | 4580 |
| Other iatrogenic hypotension | 45829 |
| Unspecified hypotension | 4589 |
| Obstructive chronic bronchitis, without exacerbation | 49120 |
| Obstructive chronic bronchitis, with (acute) exacerbation | 49121 |
| Other emphysema | 4928 |
| Chronic obstructive asthma, unspecified | 49320 |
| Chronic obstructive asthma, with (acute) exacerbation | 49322 |
| Asthma, unspecified, unspecified status | 49390 |
| Asthma, unspecified, with (acute) exacerbation | 49392 |
| Chronic airway obstruction, not elsewhere classified | 496 |
| Pleurisy without mention of effusion or current tuberculosis | 5110 |
| Unspecified pleural effusion | 5119 |
| Pulmonary congestion and hypostasis | 514 |
| Postinflammatory pulmonary fibrosis | 515 |
| Unspecified acute edema of lung | 5184 |
| Acute respiratory failure | 51881 |
| Other pulmonary insufficiency, not elsewhere classified | 51882 |
| Acute and chronic respiratory failure | 51884 |
| Other diseases of lung, not elsewhere classified | 51889 |
| Unspecified disease of the jaws | 5269 |
| Acute cholecystitis | 5750 |
| Acute pancreatitis | 5770 |
| Unspecified acute renal failure | 5849 |
| End stage renal disease | 5856 |
| Difficulty in walking | 7197 |
| Lumbago | 7242 |
| Unspecified backache | 7245 |
| Muscle weakness (generalized) | 72887 |
| Unspecified myalgia and myositis | 7291 |
| Swelling of limb | 72981 |
| Tietze's disease | 7336 |
| Tetralogy of Fallot | 7452 |
| Ventricular septal defect | 7454 |
| Ostium secundum type atrial septal defect | 7455 |
| Congenital stenosis of aortic valve | 7463 |
| Congenital insufficiency of aortic valve | 7464 |
| Congenital mitral insufficiency | 7466 |
| Congenital coronary artery anomaly | 74685 |
| Other specified congenital anomaly of heart | 74689 |
| Unspecified congenital anomaly of heart | 7469 |
| Congenital atresia and stenosis of aorta | 74722 |
| Transient alteration of awareness | 78002 |
| Other alteration of consciousness | 78009 |
| Syncope and collapse | 7802 |
| Altered mental status | 78097 |
| Edema | 7823 |
| Jaw pain | 78492 |
| Unspecified tachycardia | 7850 |
| Palpitations | 7851 |
| Undiagnosed cardiac murmurs | 7852 |
| Other abnormal heart sounds | 7853 |
| Unspecified shock | 78550 |
| Cardiogenic shock | 78551 |
| Other shock without mention of trauma | 78559 |
| Other symptoms involving cardiovascular system | 7859 |
| Unspecified respiratory abnormality | 78600 |
| Orthopnea | 78602 |
| Shortness of breath | 78605 |
| Tachypnea | 78606 |
| Wheezing | 78607 |
| Other dyspnea and respiratory abnormalities | 78609 |
| Chest pain, unspecified | 78650 |
| Precordial pain | 78651 |
| Painful respiration | 78652 |
| Chest pain, other | 78659 |
| Other symptoms involving respiratory system and chest | 7869 |
| Abdominal pain, unspecified site | 78900 |
| Abdominal pain, right upper quadrant | 78901 |
| Abdominal pain, epigastric | 78906 |
| Abdominal pain, generalized | 78907 |
| Abdominal pain, other specified site | 78909 |
| Other nonspecific abnormal serum enzyme levels | 7905 |
| Nonspecific abnormal findings on radiological and other examination of lung field | 7931 |
| Nonspecific abnormal results of pulmonary system function study | 7942 |
| Nonspecific abnormal unspecified cardiovascular function study | 79430 |
| Nonspecific abnormal electrocardiogram (ECG) (EKG) | 79431 |
| Other nonspecific abnormal cardiovascular system function study | 79439 |
| Hypoxemia | 79902 |
| Mechanical complication due to cardiac pacemaker (electrode) | 99601 |
| Mechanical complication due to coronary bypass graft | 99603 |
| Other complications due to other cardiac device, implant, and graft | 99672 |
| Complications of transplanted heart | 99683 |
| Cardiac complications | 9971 |
| Unspecified circulatory disease | V1250 |
| Personal history of other diseases of circulatory system | V1259 |
| Personal history of surgery to heart and great vessels, presenting hazards to health | V151 |
| Kidney replaced by transplant | V420 |
| Heart replaced by transplant | V421 |
| Heart valve replaced by transplant | V422 |
| Heart valve replaced by other means | V433 |
| Cardiac pacemaker in situ | V4501 |
| Automatic implantable cardiac defibrillator in situ | V4502 |
| Postprocedural aortocoronary bypass status | V4581 |
| Postprocedural percutaneous transluminal coronary angioplasty status | V4582 |
| Other cardiorespiratory problems | V472 |
| Awaiting organ transplant status | V4983 |
| Fitting and adjustment of cardiac pacemaker | V5331 |
| Encounter for antineoplastic chemotherapy | V5811 |
| Aftercare following organ transplant | V5844 |
| Encounter for long-term (current) use of other medications | V5869 |
| Encounter for therapeutic drug monitoring | V5883 |
| Follow-up examination following completed treatment with high-risk medications, not elsewhere classified | V6751 |
| Observation for suspected cardiovascular disease | V717 |

*ICD-9 Codes for Excluding Cardiovascular Stress Tests*

See advanced imaging criteria.

*ICD-9 Codes for Excluding Echocardiograms*

Echocardiograms were excluded from the analysis if the associated primary, secondary, tertiary, or quaternary diagnosis involved: (i) proximal fractures; (ii) pulmonary and chest conditions, including anything potentially resulting in chest pain (e.g., chest wall contusion); (iii) esophageal conditions (e.g., esophagitis and esophageal spasm), except those that are painless, mild, and chronic (e.g., esophageal stricture, Barrett’s esophagus, and reflux); (iv) cardiac conditions, including shortness of breath, edema, congestive heart failure and anatomic anomalies; (v) end stage renal disease and dialysis, along with all electrolyte abnormalities; (vi) infections, including sepsis, but not urinary tract infections or pneumonia; (vii) anemia and bleeding conditions, except microscopic hematuria; (viii) abdominal conditions (including abdominal pain), but not benign tumor of the colon; (ix) psychiatric conditions; (x) acute central nervous system conditions (e.g., cerebrovascular accident, delirium) and seizure or epilepsy conditions, but not chronic conditions (e.g., dementia), head ache, or migraine; (xi) drug toxicity and poisoning; (xii) transplants; (xiii) malignant hypertension; (xiv) cancers; (xv) conditions involving arterial and pulmonary emboli, but not peripheral deep vein thrombosis; (xvi) falls; (xvii) autoimmune conditions; or (xviii) pain in the anterior and posterior thorax and shoulder areas (eg. back pain), but not specific shoulder conditions such as “capsular adhesion of shoulder” and “osteoarthrosis of shoulder.”

| **Label** | **Code** |
| --- | --- |
| Streptococcal septicemia | 0380 |
| Unspecified staphylococcal septicemia | 03810 |
| Methicillin susceptible Staphylococcus aureus septicemia | 03811 |
| Methicillin resistant Staphylococcus aureus septicemia | 03812 |
| Other staphylococcal septicemia | 03819 |
| Pneumococcal septicemia | 0382 |
| Septicemia due to anaerobes | 0383 |
| Septicemia due to unspecified gram-negative organism | 03840 |
| Septicemia due to Escherichia coli (E. coli) | 03842 |
| Septicemia due to pseudomonas | 03843 |
| Other septicemia due to gram-negative organism | 03849 |
| Other specified septicemia | 0388 |
| Unspecified septicemia | 0389 |
| Methicillin susceptible Staphylococcus aureus | 04111 |
| Methicillin resistant Staphylococcus aureus | 04112 |
| Human immunodeficiency virus [HIV] | 042 |
| Candidal endocarditis | 11281 |
| Other and unspecified mycoses | 1179 |
| Sarcoidosis | 135 |
| Unspecified infectious and parasitic diseases | 1369 |
| Malignant neoplasm of esophagus, unspecified site | 1509 |
| Malignant neoplasm of cardia | 1510 |
| Malignant neoplasm of stomach, unspecified site | 1519 |
| Malignant neoplasm of hepatic flexure | 1530 |
| Malignant neoplasm of transverse colon | 1531 |
| Malignant neoplasm of descending colon | 1532 |
| Malignant neoplasm of sigmoid colon | 1533 |
| Malignant neoplasm of cecum | 1534 |
| Malignant neoplasm of ascending colon | 1536 |
| Malignant neoplasm of colon, unspecified site | 1539 |
| Malignant neoplasm of rectosigmoid junction | 1540 |
| Malignant neoplasm of rectum | 1541 |
| Malignant neoplasm of liver, primary | 1550 |
| Malignant neoplasm of head of pancreas | 1570 |
| Malignant neoplasm of pancreas, part unspecified | 1579 |
| Malignant neoplasm of main bronchus | 1622 |
| Malignant neoplasm of upper lobe, bronchus, or lung | 1623 |
| Malignant neoplasm of middle lobe, bronchus, or lung | 1624 |
| Malignant neoplasm of lower lobe, bronchus, or lung | 1625 |
| Malignant neoplasm of other parts of bronchus or lung | 1628 |
| Malignant neoplasm of bronchus and lung, unspecified site | 1629 |
| Malignant neoplasm of heart | 1641 |
| Malignant neoplasm of central portion of female breast | 1741 |
| Malignant neoplasm of upper-outer quadrant of female breast | 1744 |
| Malignant neoplasm of other specified sites of female breast | 1748 |
| Malignant neoplasm of breast (female), unspecified site | 1749 |
| Malignant neoplasm of corpus uteri, except isthmus | 1820 |
| Malignant neoplasm of ovary | 1830 |
| Malignant neoplasm of prostate | 185 |
| Malignant neoplasm of other specified sites of bladder | 1888 |
| Malignant neoplasm of bladder, part unspecified | 1889 |
| Malignant neoplasm of kidney, except pelvis | 1890 |
| Secondary malignant neoplasm of lung | 1970 |
| Secondary malignant neoplasm of pleura | 1972 |
| Secondary malignant neoplasm of retroperitoneum and peritoneum | 1976 |
| Secondary malignant neoplasm of liver | 1977 |
| Secondary malignant neoplasm of brain and spinal cord | 1983 |
| Secondary malignant neoplasm of bone and bone marrow | 1985 |
| Secondary malignant neoplasm of other specified sites | 19889 |
| Other malignant neoplasm of unspecified site | 1991 |
| Hodgkin's disease, unspecified type, unspecified site, extranodal and solid organ sites | 20190 |
| Nodular lymphoma, unspecified site, extranodal and solid organ sites | 20200 |
| Other malignant lymphomas, unspecified site, extranodal and solid organ sites | 20280 |
| Other malignant lymphomas of lymph nodes of head, face, and neck | 20281 |
| Other malignant lymphomas of intra-abdominal lymph nodes | 20283 |
| Other malignant lymphomas of lymph nodes of multiple sites | 20288 |
| Multiple myeloma, without mention of having achieved remission | 20300 |
| Acute lymphoid leukemia, without mention of having achieved remission | 20400 |
| Chronic lymphoid leukemia, without mention of having achieved remission | 20410 |
| Acute myeloid leukemia, without mention of having achieved remission | 20500 |
| Chronic myeloid leukemia, without mention of having achieved remission | 20510 |
| Unspecified leukemia, without mention of having achieved remission | 20890 |
| Benign neoplasm of heart | 2127 |
| Carcinoma in situ of bronchus and lung | 2312 |
| Carcinoma in situ of breast | 2330 |
| Myelodysplastic syndrome, unspecified | 23875 |
| Neoplasm of uncertain behavior of other specified sites | 2388 |
| Neoplasm of uncertain behavior, site unspecified | 2389 |
| Neoplasm of unspecified nature of digestive system | 2390 |
| Neoplasm of unspecified nature of respiratory system | 2391 |
| Neoplasm of unspecified nature of breast | 2393 |
| Neoplasm of unspecified nature of brain | 2396 |
| Neoplasm of unspecified nature of other specified sites | 2398 |
| Neoplasms Of Unspecified Nature, Other Specified Sites | 23989 |
| Neoplasm of unspecified nature, site unspecified | 2399 |
| Carcinoid syndrome | 2592 |
| Volume depletion, unspecified | 27650 |
| Fluid overload | 2766 |
| Fluid Overload NEC (Other Fluid Overload) | 27669 |
| Amyloidosis | 2773 |
| Amyloidosis, unspecified | 27730 |
| Other amyloidosis | 27739 |
| Autoimmune disease, not elsewhere classified | 2794 |
| Sickle-cell disease, unspecified | 28260 |
| Hb-SS disease with crisis | 28262 |
| Drug-induced delirium | 29281 |
| Delirium due to conditions classified elsewhere | 2930 |
| Carotid sinus syndrome | 33701 |
| Encephalopathy, unspecified | 34830 |
| Metabolic encephalopathy | 34831 |
| Other encephalopathy | 34839 |
| Toxic encephalopathy | 34982 |
| Myasthenia gravis with (acute) exacerbation | 35801 |
| Hereditary progressive muscular dystrophy | 3591 |
| Unspecified retinal vascular occlusion | 36230 |
| Central artery occlusion of retina | 36231 |
| Arterial branch occlusion of retina | 36232 |
| Partial arterial occlusion of retina | 36233 |
| Transient arterial occlusion of retina | 36234 |
| Sudden visual loss | 36811 |
| Rheumatic fever without mention of heart involvement | 390 |
| Acute rheumatic pericarditis | 3910 |
| Acute rheumatic endocarditis | 3911 |
| Other acute rheumatic heart disease | 3918 |
| Unspecified acute rheumatic heart disease | 3919 |
| Chronic rheumatic pericarditis | 393 |
| Mitral stenosis | 3940 |
| Rheumatic mitral insufficiency | 3941 |
| Mitral stenosis with insufficiency | 3942 |
| Other and unspecified mitral valve diseases | 3949 |
| Rheumatic aortic stenosis | 3950 |
| Rheumatic aortic insufficiency | 3951 |
| Rheumatic aortic stenosis with insufficiency | 3952 |
| Other and unspecified rheumatic aortic diseases | 3959 |
| Mitral valve stenosis and aortic valve stenosis | 3960 |
| Mitral valve stenosis and aortic valve insufficiency | 3961 |
| Mitral valve insufficiency and aortic valve stenosis | 3962 |
| Mitral valve insufficiency and aortic valve insufficiency | 3963 |
| Multiple involvement of mitral and aortic valves | 3968 |
| Unspecified mitral and aortic valve diseases | 3969 |
| Diseases of tricuspid valve | 3970 |
| Rheumatic diseases of pulmonary valve | 3971 |
| Rheumatic diseases of endocardium, valve unspecified | 3979 |
| Rheumatic myocarditis | 3980 |
| Unspecified rheumatic heart disease | 39890 |
| Rheumatic heart failure (congestive) | 39891 |
| Other and unspecified rheumatic heart diseases | 39899 |
| Malignant hypertensive heart disease without heart failure | 40200 |
| Malignant hypertensive heart disease with heart failure | 40201 |
| Benign hypertensive heart disease without heart failure | 40210 |
| Benign hypertensive heart disease with heart failure | 40211 |
| Hypertensive heart disease, unspecified, with heart failure | 40291 |
| Hypertensive chronic kidney disease, benign, with chronic kidney disease stage I-IV | 40310 |
| Hypertensive heart and chronic kidney disease, malignant, without heart failure and with chronic kidney disease stage I-IV | 40400 |
| Hypertensive heart and chronic kidney disease, malignant, with heart failure and with chronic kidney disease stage I-IV | 40401 |
| Hypertensive heart and chronic kidney disease, malignant, without heart failure and with chronic kidney disease stage V | 40402 |
| Hypertensive heart and chronic kidney disease, malignant, with heart failure and with chronic kidney disease stage V | 40403 |
| Hypertensive heart and chronic kidney disease, benign, without heart failure and with chronic kidney disease stage I-IV | 40410 |
| Hypertensive heart and chronic kidney disease, benign, with heart failure and with chronic kidney disease stage I-IV | 40411 |
| Hypertensive heart and chronic kidney disease, benign, without heart failure and with chronic kidney disease stage V | 40412 |
| Hypertensive heart and chronic kidney disease, benign, with heart failure and with chronic kidney disease stage V | 40413 |
| Hypertensive heart and chronic kidney disease, unspecified, without heart failure and with chronic kidney disease stage I-IV | 40490 |
| Hypertensive heart and chronic kidney disease, unspecified, with heart failure and with chronic kidney disease stage I-IV | 40491 |
| Hypertensive heart and chronic kidney disease, unspecified, without heart failure and with chronic kidney disease stage V | 40492 |
| Hypertensive heart and chronic kidney disease, unspecified, with heart failure and with chronic kidney disease stage V | 40493 |
| Secondary renovascular hypertension, malignant | 40501 |
| Secondary renovascular hypertension, benign | 40511 |
| Acute myocardial infarction of anterolateral wall, episode of care unspecified | 41000 |
| Acute myocardial infarction of anterolateral wall, initial episode of care | 41001 |
| Acute myocardial infarction of anterolateral wall, subsequent episode of care | 41002 |
| Acute myocardial infarction of other anterior wall, episode of care unspecified | 41010 |
| Acute myocardial infarction of other anterior wall, initial episode of care | 41011 |
| Acute myocardial infarction of other anterior wall, subsequent episode of care | 41012 |
| Acute myocardial infarction of inferolateral wall, episode of care unspecified | 41020 |
| Acute myocardial infarction of inferolateral wall, initial episode of care | 41021 |
| Acute myocardial infarction of inferolateral wall, subsequent episode of care | 41022 |
| Acute myocardial infarction of inferoposterior wall, episode of care unspecified | 41030 |
| Acute myocardial infarction of inferoposterior wall, initial episode of care | 41031 |
| Acute myocardial infarction of inferoposterior wall, subsequent episode of care | 41032 |
| Acute myocardial infarction of other inferior wall, episode of care unspecified | 41040 |
| Acute myocardial infarction of other inferior wall, initial episode of care | 41041 |
| Acute myocardial infarction of other inferior wall, subsequent episode of care | 41042 |
| Acute myocardial infarction of other lateral wall, episode of care unspecified | 41050 |
| Acute myocardial infarction of other lateral wall, initial episode of care | 41051 |
| Acute myocardial infarction of other lateral wall, subsequent episode of care | 41052 |
| Acute myocardial infarction, true posterior wall infarction, episode of care unspecified | 41060 |
| Acute myocardial infarction, true posterior wall infarction, initial episode of care | 41061 |
| Acute myocardial infarction, true posterior wall infarction, subsequent episode of care | 41062 |
| Acute myocardial infarction, subendocardial infarction, episode of care unspecified | 41070 |
| Acute myocardial infarction, subendocardial infarction, initial episode of care | 41071 |
| Acute myocardial infarction, subendocardial infarction, subsequent episode of care | 41072 |
| Acute myocardial infarction of other specified sites, episode of care unspecified | 41080 |
| Acute myocardial infarction of other specified sites, initial episode of care | 41081 |
| Acute myocardial infarction of other specified sites, subsequent episode of care | 41082 |
| Acute myocardial infarction, unspecified site, episode of care unspecified | 41090 |
| Acute myocardial infarction, unspecified site, initial episode of care | 41091 |
| Acute myocardial infarction, unspecified site, subsequent episode of care | 41092 |
| Postmyocardial infarction syndrome | 4110 |
| Intermediate coronary syndrome | 4111 |
| Acute coronary occlusion without myocardial infarction | 41181 |
| Other acute and subacute form of ischemic heart disease | 41189 |
| Old myocardial infarction | 412 |
| Angina decubitus | 4130 |
| Prinzmetal angina | 4131 |
| Other and unspecified angina pectoris | 4139 |
| Coronary atherosclerosis of unspecified type of vessel, native or graft | 41400 |
| Coronary atherosclerosis of native coronary artery | 41401 |
| Coronary atherosclerosis of autologous vein bypass graft | 41402 |
| Coronary atherosclerosis of nonautologous biological bypass graft | 41403 |
| Coronary atherosclerosis of artery bypass graft | 41404 |
| Coronary atherosclerosis of unspecified type of bypass graft | 41405 |
| Coronary atherosclerosis, of native coronary artery of transplanted heart | 41406 |
| Coronary atherosclerosis, of bypass graft (artery) (vein) of transplanted heart | 41407 |
| Aneurysm of heart | 41410 |
| Aneurysm of coronary vessels | 41411 |
| Dissection of coronary artery | 41412 |
| Other aneurysm of heart | 41419 |
| Chronic total occlusion of coronary artery | 4142 |
| Coronary atherosclerosis due to lipid rich plaque | 4143 |
| Other specified forms of chronic ischemic heart disease | 4148 |
| Unspecified chronic ischemic heart disease | 4149 |
| Acute cor pulmonale | 4150 |
| Iatrogenic pulmonary embolism and infarction | 41511 |
| Septic pulmonary embolism | 41512 |
| Other pulmonary embolism and infarction | 41519 |
| Primary pulmonary hypertension | 4160 |
| Kyphoscoliotic heart disease | 4161 |
| Chronic pulmonary embolism | 4162 |
| Other chronic pulmonary heart diseases | 4168 |
| Unspecified chronic pulmonary heart disease | 4169 |
| Arteriovenous fistula of pulmonary vessels | 4170 |
| Aneurysm of pulmonary artery | 4171 |
| Other specified disease of pulmonary circulation | 4178 |
| Unspecified disease of pulmonary circulation | 4179 |
| Acute pericarditis in diseases classified elsewhere | 4200 |
| Unspecified acute pericarditis | 42090 |
| Acute idiopathic pericarditis | 42091 |
| Other acute pericarditis | 42099 |
| Acute and subacute bacterial endocarditis | 4210 |
| Acute and subacute infective endocarditis in diseases classified elsewhere | 4211 |
| Unspecified acute endocarditis | 4219 |
| Acute myocarditis in diseases classified elsewhere | 4220 |
| Unspecified acute myocarditis | 42290 |
| Idiopathic myocarditis | 42291 |
| Septic myocarditis | 42292 |
| Toxic myocarditis | 42293 |
| Hemopericardium | 4230 |
| Adhesive pericarditis | 4231 |
| Constrictive pericarditis | 4232 |
| Cardiac tamponade | 4233 |
| Other specified diseases of pericardium | 4238 |
| Unspecified disease of pericardium | 4239 |
| Mitral valve disorders | 4240 |
| Aortic valve disorders | 4241 |
| Tricuspid valve disorders, specified as nonrheumatic | 4242 |
| Pulmonary valve disorders | 4243 |
| Endocarditis, valve unspecified, unspecified cause | 42490 |
| Endocarditis in diseases classified elsewhere | 42491 |
| Other endocarditis, valve unspecified | 42499 |
| Endomyocardial fibrosis | 4250 |
| Hypertrophic obstructive cardiomyopathy | 4251 |
| Hypertrophic obstructive cardiomyopathy | 42511 |
| Other hypertrophic cardiomyopathy | 42518 |
| Obscure cardiomyopathy of Africa | 4252 |
| Endocardial fibroelastosis | 4253 |
| Other primary cardiomyopathies | 4254 |
| Alcoholic cardiomyopathy | 4255 |
| Nutritional and metabolic cardiomyopathy | 4257 |
| Cardiomyopathy in other diseases classified elsewhere | 4258 |
| Unspecified secondary cardiomyopathy | 4259 |
| Atrioventricular block, complete | 4260 |
| Unspecified atrioventricular block | 42610 |
| First degree atrioventricular block | 42611 |
| Mobitz (type) II atrioventricular block | 42612 |
| Other second degree atrioventricular block | 42613 |
| Left bundle branch hemiblock | 4262 |
| Other left bundle branch block | 4263 |
| Right bundle branch block | 4264 |
| Unspecified bundle branch block | 42650 |
| Right bundle branch block and left posterior fascicular block | 42651 |
| Right bundle branch block and left anterior fascicular block | 42652 |
| Other bilateral bundle branch block | 42653 |
| Trifascicular block | 42654 |
| Other heart block | 4266 |
| Anomalous atrioventricular excitation | 4267 |
| Long QT syndrome | 42682 |
| Other specified conduction disorder | 42689 |
| Unspecified conduction disorder | 4269 |
| Paroxysmal supraventricular tachycardia | 4270 |
| Paroxysmal ventricular tachycardia | 4271 |
| Unspecified paroxysmal tachycardia | 4272 |
| Atrial fibrillation | 42731 |
| Atrial flutter | 42732 |
| Ventricular fibrillation | 42741 |
| Ventricular flutter | 42742 |
| Cardiac arrest | 4275 |
| Unspecified premature beats | 42760 |
| Supraventricular premature beats | 42761 |
| Other premature beats | 42769 |
| Sinoatrial node dysfunction | 42781 |
| Other specified cardiac dysrhythmias | 42789 |
| Unspecified cardiac dysrhythmia | 4279 |
| Congestive heart failure, unspecified | 4280 |
| Left heart failure | 4281 |
| Unspecified systolic heart failure | 42820 |
| Acute systolic heart failure | 42821 |
| Chronic systolic heart failure | 42822 |
| Acute on chronic systolic heart failure | 42823 |
| Unspecified diastolic heart failure | 42830 |
| Acute diastolic heart failure | 42831 |
| Chronic diastolic heart failure | 42832 |
| Acute on chronic diastolic heart failure | 42833 |
| Unspecified combined systolic and diastolic heart failure | 42840 |
| Acute combined systolic and diastolic heart failure | 42841 |
| Chronic combined systolic and diastolic heart failure | 42842 |
| Acute on chronic combined systolic and diastolic heart failure | 42843 |
| Unspecified heart failure | 4289 |
| Unspecified myocarditis | 4290 |
| Myocardial degeneration | 4291 |
| Unspecified cardiovascular disease | 4292 |
| Cardiomegaly | 4293 |
| Functional disturbances following cardiac surgery | 4294 |
| Rupture of chordae tendineae | 4295 |
| Rupture of papillary muscle | 4296 |
| Acquired cardiac septal defect | 42971 |
| Other certain sequelae of myocardial infarction, not elsewhere classified | 42979 |
| Other disorders of papillary muscle | 42981 |
| Hyperkinetic heart disease | 42982 |
| Takotsubo syndrome | 42983 |
| Other ill-defined heart disease | 42989 |
| Unspecified heart disease | 4299 |
| Intracerebral hemorrhage | 431 |
| Unspecified intracranial hemorrhage | 4329 |
| Occlusion and stenosis of basilar artery without mention of cerebral infarction | 43300 |
| Occlusion and stenosis of basilar artery with cerebral infarction | 43301 |
| Occlusion and stenosis of carotid artery without mention of cerebral infarction | 43310 |
| Occlusion and stenosis of carotid artery with cerebral infarction | 43311 |
| Occlusion and stenosis of multiple and bilateral precerebral arteries without mention of cerebral infarction | 43330 |
| Occlusion and stenosis of multiple and bilateral precerebral arteries with cerebral infarction | 43331 |
| Occlusion and stenosis of unspecified precerebral artery without mention of cerebral infarction | 43390 |
| Occlusion and stenosis of unspecified precerebral artery with cerebral infarction | 43391 |
| Cerebral thrombosis without mention of cerebral infarction | 43400 |
| Cerebral thrombosis with cerebral infarction | 43401 |
| Cerebral embolism without mention of cerebral infarction | 43410 |
| Cerebral embolism with cerebral infarction | 43411 |
| Unspecified cerebral artery occlusion without mention of cerebral infarction | 43490 |
| Unspecified cerebral artery occlusion with cerebral infarction | 43491 |
| Basilar artery syndrome | 4350 |
| Vertebral artery syndrome | 4351 |
| Subclavian steal syndrome | 4352 |
| Vertebrobasilar artery syndrome | 4353 |
| Other specified transient cerebral ischemias | 4358 |
| Unspecified transient cerebral ischemia | 4359 |
| Acute, but ill-defined, cerebrovascular disease | 436 |
| Other generalized ischemic cerebrovascular disease | 4371 |
| Hypertensive encephalopathy | 4372 |
| Transient global amnesia | 4377 |
| Unspecified cerebrovascular disease | 4379 |
| Hemiplegia affecting unspecified side due to cerebrovascular disease | 43820 |
| Atherosclerosis of aorta | 4400 |
| Atherosclerosis of native arteries of the extremities, unspecified | 44020 |
| Atherosclerosis of native arteries of the extremities with intermittent claudication | 44021 |
| Atherosclerosis of native arteries of the extremities with rest pain | 44022 |
| Atherosclerosis of native arteries of the extremities with ulceration | 44023 |
| Atherosclerosis of native arteries of the extremities with gangrene | 44024 |
| Other atherosclerosis of native arteries of the extremities | 44029 |
| Generalized and unspecified atherosclerosis | 4409 |
| Dissecting aortic aneurysm (any part), unspecified site | 44100 |
| Dissecting aortic aneurysm (any part), thoracic | 44101 |
| Dissecting aortic aneurysm (any part), abdominal | 44102 |
| Dissecting aortic aneurysm (any part), thoracoabdominal | 44103 |
| Thoracic aneurysm, ruptured | 4411 |
| Thoracic aneurysm without mention of rupture | 4412 |
| Abdominal aneurysm, ruptured | 4413 |
| Abdominal aneurysm without mention of rupture | 4414 |
| Aortic aneurysm of unspecified site, ruptured | 4415 |
| Thoracoabdominal aneurysm, ruptured | 4416 |
| Thoracoabdominal aneurysm without mention of rupture | 4417 |
| Aortic aneurysm of unspecified site without mention of rupture | 4419 |
| Aneurysm of iliac artery | 4422 |
| Aneurysm of artery of lower extremity | 4423 |
| Aneurysm of artery of neck | 44281 |
| Other aneurysm of unspecified site | 4429 |
| Thromboangiitis obliterans (Buerger's disease) | 4431 |
| Peripheral angiopathy in diseases classified elsewhere | 44381 |
| Embolism and thrombosis of abdominal aorta | 4440 |
| Embolism and thrombosis of thoracic aorta | 4441 |
| Embolism and thrombosis of arteries of upper extremity | 44421 |
| Embolism and thrombosis of arteries of lower extremity | 44422 |
| Embolism and thrombosis of iliac artery | 44481 |
| Embolism and thrombosis of other specified artery | 44489 |
| Embolism and thrombosis of unspecified artery | 4449 |
| Atheroembolism of other site | 44589 |
| Giant cell arteritis | 4465 |
| Takayasu's disease | 4467 |
| Stricture of artery | 4471 |
| Unspecified arteritis | 4476 |
| Aortic ectasia unspecified site | 44770 |
| Thoracic aortic ectasia | 44771 |
| Other specified disorders of arteries and arterioles | 4478 |
| Unspecified disorders of arteries and arterioles | 4479 |
| Embolism and thrombosis of vena cava | 4532 |
| Venous embolism and thrombosis of unspecified deep vessels of lower extremity | 45340 |
| Venous embolism and thrombosis of deep vessels of proximal lower extremity | 45341 |
| Venous embolism and thrombosis of deep vessels of distal lower extremity | 45342 |
| Venous embolism and thrombosis of other specified veins | 4538 |
| Embolism and thrombosis of unspecified site | 4539 |
| Orthostatic hypotension | 4580 |
| Chronic hypotension | 4581 |
| Hypotension of hemodialysis | 45821 |
| Other iatrogenic hypotension | 45829 |
| Other specified hypotension | 4588 |
| Unspecified hypotension | 4589 |
| Other specified circulatory system disorders | 45989 |
| Unspecified circulatory system disorder | 4599 |
| Acute upper respiratory infections of unspecified site | 4659 |
| Methicillin susceptible pneumonia due to Staphylococcus aureus | 48241 |
| Obstructive chronic bronchitis, with (acute) exacerbation | 49121 |
| Obstructive chronic bronchitis with acute bronchitis | 49122 |
| Extrinsic asthma, unspecified | 49300 |
| Intrinsic asthma, unspecified | 49310 |
| Chronic obstructive asthma, unspecified | 49320 |
| Chronic obstructive asthma with status asthmaticus | 49321 |
| Chronic obstructive asthma, with (acute) exacerbation | 49322 |
| Asthma, unspecified, unspecified status | 49390 |
| Asthma, unspecified with status asthmaticus | 49391 |
| Asthma, unspecified, with (acute) exacerbation | 49392 |
| Bronchiectasis with acute exacerbation | 4941 |
| Chronic airway obstruction, not elsewhere classified | 496 |
| Empyema without mention of fistula | 5109 |
| Pleurisy without mention of effusion or current tuberculosis | 5110 |
| Pleurisy with effusion, with mention of bacterial cause other than tuberculosis | 5111 |
| Other specified forms of pleural effusion, except tuberculous | 5118 |
| Malignant pleural effusion | 51181 |
| Other specified forms of effusion, except tuberculous | 51189 |
| Unspecified pleural effusion | 5119 |
| Other spontaneous pneumothorax | 5128 |
| Abscess of lung | 5130 |
| Pulmonary congestion and hypostasis | 514 |
| Postinflammatory pulmonary fibrosis | 515 |
| Idiopathic fibrosing alveolitis | 5163 |
| Other specified alveolar and parietoalveolar pneumonopathies | 5168 |
| Pulmonary collapse | 5180 |
| Unspecified acute edema of lung | 5184 |
| Pulmonary insufficiency following trauma and surgery | 5185 |
| Acute respiratory failure | 51881 |
| Other pulmonary insufficiency, not elsewhere classified | 51882 |
| Chronic respiratory failure | 51883 |
| Acute and chronic respiratory failure | 51884 |
| Other diseases of lung, not elsewhere classified | 51889 |
| Acute bronchospasm | 51911 |
| Unspecified disease of respiratory system | 5199 |
| Acute vascular insufficiency of intestine | 5570 |
| Unspecified vascular insufficiency of intestine | 5579 |
| Diverticulosis of colon with hemorrhage | 56212 |
| Hemoperitoneum (nontraumatic) | 56881 |
| Hepatic coma | 5722 |
| Acute pancreatitis | 5770 |
| Acute renal failure with lesion of tubular necrosis | 5845 |
| Unspecified acute renal failure | 5849 |
| End stage renal disease | 5856 |
| Suspected damage to fetus from drugs, affecting management of mother, antepartum condition or complication | 65553 |
| Other known or suspected fetal abnormality, not elsewhere classified, affecting management of mother, antepartum condition or complication | 65583 |
| Unspecified fetal abnormality affecting management of mother, antepartum condition or complication | 65593 |
| Systemic lupus erythematosus | 7100 |
| Systemic sclerosis | 7101 |
| Rheumatoid arthritis | 7140 |
| Effusion of lower leg joint | 71906 |
| Pain in thoracic spine | 7241 |
| Swelling of limb | 72981 |
| Tietze's disease | 7336 |
| Bulbus cordis anomalies and anomalies of cardiac septal closure, common truncus | 7450 |
| Complete transposition of great vessels | 74510 |
| Transposition of great vessels, double outlet right ventricle | 74511 |
| Corrected transposition of great vessels | 74512 |
| Other transposition of great vessels | 74519 |
| Tetralogy of Fallot | 7452 |
| Bulbus cordis anomalies and anomalies of cardiac septal closure, common ventricle | 7453 |
| Ventricular septal defect | 7454 |
| Ostium secundum type atrial septal defect | 7455 |
| Unspecified type congenital endocardial cushion defect | 74560 |
| Ostium primum defect | 74561 |
| Other congenital endocardial cushion defect | 74569 |
| Other bulbus cordis anomalies and anomalies of cardiac septal closure | 7458 |
| Unspecified congenital defect of septal closure | 7459 |
| Unspecified congenital pulmonary valve anomaly | 74600 |
| Congenital atresia of pulmonary valve | 74601 |
| Congenital stenosis of pulmonary valve | 74602 |
| Other congenital anomalies of pulmonary valve | 74609 |
| Congenital tricuspid atresia and stenosis | 7461 |
| Ebstein's anomaly | 7462 |
| Congenital stenosis of aortic valve | 7463 |
| Congenital insufficiency of aortic valve | 7464 |
| Congenital mitral stenosis | 7465 |
| Congenital mitral insufficiency | 7466 |
| Hypoplastic left heart syndrome | 7467 |
| Congenital subaortic stenosis | 74681 |
| Congenital obstructive anomalies of heart, not elsewhere classified | 74684 |
| Congenital coronary artery anomaly | 74685 |
| Congenital heart block | 74686 |
| Congenital malposition of heart and cardiac apex | 74687 |
| Other specified congenital anomaly of heart | 74689 |
| Unspecified congenital anomaly of heart | 7469 |
| Patent ductus arteriosus | 7470 |
| Coarctation of aorta (preductal) (postductal) | 74710 |
| Unspecified congenital anomaly of aorta | 74720 |
| Congenital anomaly of aortic arch | 74721 |
| Congenital atresia and stenosis of aorta | 74722 |
| Other congenital anomaly of aorta | 74729 |
| Congenital anomalies of pulmonary artery | 7473 |
| Partial congenital anomalous pulmonary venous connection | 74742 |
| Down's syndrome | 7580 |
| Marfan's syndrome | 75982 |
| Other specified multiple congenital anomalies, so described | 75989 |
| Coma | 78001 |
| Transient alteration of awareness | 78002 |
| Other alteration of consciousness | 78009 |
| Syncope and collapse | 7802 |
| Dizziness and giddiness | 7804 |
| Fever and other physiologic disturbances of temperature regulation | 7806 |
| Fever, unspecified | 78060 |
| Fever presenting with conditions classified elsewhere | 78061 |
| Chronic fatigue syndrome | 78071 |
| Memory loss | 78093 |
| Altered mental status | 78097 |
| Edema | 7823 |
| Cyanosis | 7825 |
| Unspecified tachycardia | 7850 |
| Palpitations | 7851 |
| Undiagnosed cardiac murmurs | 7852 |
| Other abnormal heart sounds | 7853 |
| Gangrene | 7854 |
| Unspecified shock | 78550 |
| Cardiogenic shock | 78551 |
| Septic shock | 78552 |
| Other shock without mention of trauma | 78559 |
| Other symptoms involving cardiovascular system | 7859 |
| Unspecified respiratory abnormality | 78600 |
| Apnea | 78603 |
| Cheyne-Stokes respiration | 78604 |
| Shortness of breath | 78605 |
| Tachypnea | 78606 |
| Wheezing | 78607 |
| Other dyspnea and respiratory abnormalities | 78609 |
| Hemoptysis | 7863 |
| Chest pain, unspecified | 78650 |
| Precordial pain | 78651 |
| Painful respiration | 78652 |
| Chest pain, other | 78659 |
| Abnormal chest sounds | 7867 |
| Other symptoms involving respiratory system and chest | 7869 |
| Bacteremia | 7907 |
| Nonspecific abnormal findings on radiological and other examination of other intrathoracic organs | 7932 |
| Nonspecific abnormal findings on radiological and other examination of abdominal area, including retroperitoneum | 7936 |
| Nonspecific abnormal unspecified cardiovascular function study | 79430 |
| Nonspecific abnormal electrocardiogram (ECG) (EKG) | 79431 |
| Other nonspecific abnormal cardiovascular system function study | 79439 |
| Nonspecific abnormal findings on chromosomal analysis | 7952 |
| Nonspecific low blood pressure reading | 7963 |
| Asphyxia | 79901 |
| Hypoxemia | 79902 |
| Respiratory arrest | 7991 |
| Closed fracture of rib(s), unspecified | 80700 |
| Closed fracture of one rib | 80701 |
| Closed fracture of two ribs | 80702 |
| Closed fracture of three ribs | 80703 |
| Closed fracture of multiple ribs, unspecified | 80709 |
| Closed fracture of sternum | 8072 |
| Flail chest | 8074 |
| Subarachnoid hemorrhage following injury, without mention of open intracranial wound, unspecified state of consciousness | 85200 |
| Subarachnoid hemorrhage following injury, without mention of open intracranial wound, no loss of consciousness | 85201 |
| Subdural hemorrhage following injury, without mention of open intracranial wound, with brief [less than one hour] loss of consciousness | 85222 |
| Subdural hemorrhage following injury, without mention of open intracranial wound, loss of consciousness of unspecified duration | 85226 |
| Other and unspecified intracranial hemorrhage following injury, without mention of open intracranial wound, unspecified state of consciousness | 85300 |
| Traumatic pneumothorax without mention of open wound into thorax | 8600 |
| Traumatic hemothorax without mention of open wound into thorax | 8602 |
| Unspecified injury to heart without mention of open wound into thorax | 86100 |
| Heart contusion without mention of open wound into thorax | 86101 |
| Contusion of chest wall | 9221 |
| Traumatic shock | 9584 |
| Other injury of chest wall | 95911 |
| Poisoning by antineoplastic antibiotics | 9607 |
| Poisoning by antineoplastic and immunosuppressive drugs | 9631 |
| Poisoning by anticoagulants | 9642 |
| Poisoning by opium (alkaloids), unspecified | 96500 |
| Poisoning by opiates and related narcotics, other | 96509 |
| Poisoning by benzodiazepine-based tranquilizers | 9694 |
| Poisoning by cardiotonic glycosides and drugs of similar action | 9721 |
| Poisoning by unspecified drug or medicinal substance | 9779 |
| Effects of radiation, unspecified | 990 |
| Angioneurotic edema not elsewhere classified | 9951 |
| Other and unspecified adverse effect of drug, medicinal and biological substance | 9952 |
| Unspecified adverse effect of unspecified drug, medicinal and biological substance | 99520 |
| Unspecified adverse effect of other drug, medicinal and biological substance | 99529 |
| Sepsis | 99591 |
| Severe sepsis | 99592 |
| Mechanical complication of unspecified cardiac device, implant, and graft | 99600 |
| Mechanical complication due to cardiac pacemaker (electrode) | 99601 |
| Mechanical complication due to heart valve prosthesis | 99602 |
| Mechanical complication due to coronary bypass graft | 99603 |
| Mechanical complication due to automatic implantable cardiac defibrillator | 99604 |
| Mechanical complication of cardiac device, implant, and graft, other | 99609 |
| Mechanical complication of other vascular device, implant, and graft | 9961 |
| Infection and inflammatory reaction due to cardiac device, implant, and graft | 99661 |
| Infection and inflammatory reaction due to other vascular device, implant, and graft | 99662 |
| Infection and inflammatory reaction due to peritoneal dialysis catheter | 99668 |
| Other complications due to heart valve prosthesis | 99671 |
| Other complications due to other cardiac device, implant, and graft | 99672 |
| Other complications due to renal dialysis device, implant, and graft | 99673 |
| Other complications due to other vascular device, implant, and graft | 99674 |
| Complications of transplanted kidney | 99681 |
| Complications of transplanted heart | 99683 |
| Complications of transplanted lung | 99684 |
| Cardiac complications | 9971 |
| Respiratory complications | 9973 |
| Postoperative shock, not elsewhere classified | 9980 |
| Accidental puncture or laceration during procedure | 9982 |
| Antineoplastic and immunosuppressive drugs causing adverse effect in therapeutic use | E9331 |
| Personal history of malignant neoplasm of breast | V103 |
| Personal history of venous thrombosis and embolism | V1251 |
| Personal history of transient ischemic attack [TIA], and cerebral infarction without residual deficits | V1254 |
| Personal history of other diseases of circulatory system | V1259 |
| Personal history of surgery to heart and great vessels, presenting hazards to health | V151 |
| Family history of other cardiovascular diseases | V1749 |
| Kidney replaced by transplant | V420 |
| Heart replaced by transplant | V421 |
| Heart valve replaced by transplant | V422 |
| Lung replaced by transplant | V426 |
| Organ or tissue replaced by other means, Heart assist device | V4321 |
| Heart valve replaced by other means | V433 |
| Blood vessel replaced by other means | V434 |
| Unspecified cardiac device in situ | V4500 |
| Cardiac pacemaker in situ | V4501 |
| Automatic implantable cardiac defibrillator in situ | V4502 |
| Other specified cardiac device in situ | V4509 |
| Postprocedural aortocoronary bypass status | V4581 |
| Postprocedural percutaneous transluminal coronary angioplasty status | V4582 |
| Other cardiorespiratory problems | V472 |
| Fitting and adjustment of cardiac pacemaker | V5331 |
| Fitting and adjustment of automatic implantable cardiac defibrillator | V5332 |
| Encounter for antineoplastic chemotherapy | V5811 |
| Encounter for antineoplastic immunotherapy | V5812 |
| Aftercare following organ transplant | V5844 |
| Encounter for long-term (current) use of other medications | V5869 |
| Encounter for therapeutic drug monitoring | V5883 |
| Chemotherapy follow-up examination | V672 |
| Follow-up examination following completed treatment with high-risk medications, not elsewhere classified | V6751 |
| Observation for suspected cardiovascular disease | V717 |

*ICD-9 Codes for Excluding Electrocardiograms*

Electrocardiograms were excluded from the analysis if the associated primary, secondary, tertiary, or quaternary diagnosis involved: (i) proximal fractures; (ii) pulmonary and chest conditions, including anything potentially resulting in chest pain (e.g., chest wall contusion); (iii) esophageal conditions (e.g., esophagitis and esophageal spasm), except those that are painless, mild, and chronic (e.g., esophageal stricture, Barrett’s esophagus, and reflux); (iv) cardiac conditions, including shortness of breath, edema, congestive heart failure and anatomic anomalies; (v) end stage renal disease and dialysis, along with all electrolyte abnormalities; (vi) infections, including sepsis, but not urinary tract infections or pneumonia; (vii) anemia and bleeding conditions, except microscopic hematuria; (viii) abdominal conditions (including abdominal pain), but not benign tumor of the colon; (ix) psychiatric conditions; (x) acute central nervous system conditions (e.g., cerebrovascular accident, delirium) and seizure or epilepsy conditions, but not chronic conditions (e.g., dementia), head ache, or migraine; (xi) drug toxicity and poisoning; (xii) transplants; (xiii) malignant hypertension; (xiv) cancers; (xv) conditions involving arterial and pulmonary emboli, but not peripheral deep vein thrombosis; (xvi) falls; (xvii) autoimmune conditions; or (xviii) pain in the anterior and posterior thorax and shoulder areas (eg. back pain), but not specific shoulder conditions such as “capsular adhesion of shoulder” and “osteoarthrosis of shoulder.”

| **Label** | **Code** |
| --- | --- |
| Salmonella septicemia | 0031 |
| Human immunodeficiency virus [HIV] | 042 |
| Unspecified food poisoning | 0059 |
| Sarcoidosis | 135 |
| Malignant neoplasm of uterus, part unspecified | 179 |
| Malignant neoplasm of prostate | 185 |
| Malignant neoplasm of thyroid gland | 193 |
| Nutritional marasmus | 261 |
| Other severe protein-calorie malnutrition | 262 |
| Depressive disorder, not elsewhere classified | 311 |
| Disseminated diseases due to other mycobacteria | 0312 |
| Multiple sclerosis | 340 |
| Streptococcal septicemia | 0380 |
| Pneumococcal septicemia | 0382 |
| Septicemia due to anaerobes | 0383 |
| Other specified septicemia | 0388 |
| Unspecified septicemia | 0389 |
| Rheumatic fever without mention of heart involvement | 390 |
| Gas gangrene | 0400 |
| Old myocardial infarction | 412 |
| Subarachnoid hemorrhage | 430 |
| Intracerebral hemorrhage | 431 |
| Acute, but ill-defined, cerebrovascular disease | 436 |
| Portal vein thrombosis | 452 |
| Unspecified viral meningitis | 0479 |
| Bronchitis, not specified as acute or chronic | 490 |
| Unspecified non-arthropod-borne viral disease of central nervous system | 0499 |
| Coal workers' pneumoconiosis | 500 |
| Asbestosis | 501 |
| Pulmonary congestion and hypostasis | 514 |
| Postinflammatory pulmonary fibrosis | 515 |
| Appendicitis, unqualified | 541 |
| Herpetic meningoencephalitis | 0543 |
| Acute and subacute necrosis of liver | 570 |
| Unspecified renal failure | 586 |
| Respiratory distress syndrome in newborn | 769 |
| Toxic effect of carbon monoxide | 986 |
| Effects of radiation, unspecified | 990 |
| Candidiasis of lung | 1124 |
| Disseminated candidiasis | 1125 |
| Aspergillosis | 1173 |
| Malignant neoplasm of lower lip, vermilion border | 1401 |
| Malignant neoplasm of base of tongue | 1410 |
| Malignant neoplasm of anterior two-thirds of tongue, part unspecified | 1414 |
| Malignant neoplasm of tongue, unspecified site | 1419 |
| Malignant neoplasm of parotid gland | 1420 |
| Malignant neoplasm of floor of mouth, part unspecified | 1449 |
| Malignant neoplasm of mouth, unspecified site | 1459 |
| Malignant neoplasm of tonsil | 1460 |
| Malignant neoplasm of oropharynx, unspecified site | 1469 |
| Malignant neoplasm of nasopharynx, unspecified site | 1479 |
| Malignant neoplasm of thoracic esophagus | 1501 |
| Malignant neoplasm of upper third of esophagus | 1503 |
| Malignant neoplasm of middle third of esophagus | 1504 |
| Malignant neoplasm of lower third of esophagus | 1505 |
| Malignant neoplasm of other specified part of esophagus | 1508 |
| Malignant neoplasm of esophagus, unspecified site | 1509 |
| Malignant neoplasm of cardia | 1510 |
| Malignant neoplasm of pylorus | 1511 |
| Malignant neoplasm of pyloric antrum | 1512 |
| Malignant neoplasm of fundus of stomach | 1513 |
| Malignant neoplasm of body of stomach | 1514 |
| Malignant neoplasm of lesser curvature of stomach, unspecified | 1515 |
| Malignant neoplasm of other specified sites of stomach | 1518 |
| Malignant neoplasm of stomach, unspecified site | 1519 |
| Malignant neoplasm of duodenum | 1520 |
| Malignant neoplasm of ileum | 1522 |
| Malignant neoplasm of small intestine, unspecified site | 1529 |
| Malignant neoplasm of hepatic flexure | 1530 |
| Malignant neoplasm of transverse colon | 1531 |
| Malignant neoplasm of descending colon | 1532 |
| Malignant neoplasm of sigmoid colon | 1533 |
| Malignant neoplasm of cecum | 1534 |
| Malignant neoplasm of appendix | 1535 |
| Malignant neoplasm of ascending colon | 1536 |
| Malignant neoplasm of splenic flexure | 1537 |
| Malignant neoplasm of other specified sites of large intestine | 1538 |
| Malignant neoplasm of colon, unspecified site | 1539 |
| Malignant neoplasm of rectosigmoid junction | 1540 |
| Malignant neoplasm of rectum | 1541 |
| Malignant neoplasm of anal canal | 1542 |
| Malignant neoplasm of anus, unspecified site | 1543 |
| Malignant neoplasm of other sites of rectum, rectosigmoid junction, and anus | 1548 |
| Malignant neoplasm of liver, primary | 1550 |
| Malignant neoplasm of intrahepatic bile ducts | 1551 |
| Malignant neoplasm of liver, not specified as primary or secondary | 1552 |
| Malignant neoplasm of gallbladder | 1560 |
| Malignant neoplasm of extrahepatic bile ducts | 1561 |
| Malignant neoplasm of ampulla of Vater | 1562 |
| Malignant neoplasm of biliary tract, part unspecified site | 1569 |
| Malignant neoplasm of head of pancreas | 1570 |
| Malignant neoplasm of body of pancreas | 1571 |
| Malignant neoplasm of tail of pancreas | 1572 |
| Malignant neoplasm of other specified sites of pancreas | 1578 |
| Malignant neoplasm of pancreas, part unspecified | 1579 |
| Malignant neoplasm of retroperitoneum | 1580 |
| Malignant neoplasm of specified parts of peritoneum | 1588 |
| Malignant neoplasm of peritoneum, unspecified | 1589 |
| Malignant neoplasm of intestinal tract, part unspecified | 1590 |
| Malignant neoplasm of nasal cavities | 1600 |
| Malignant neoplasm of maxillary sinus | 1602 |
| Malignant neoplasm of glottis | 1610 |
| Malignant neoplasm of supraglottis | 1611 |
| Malignant neoplasm of other specified sites of larynx | 1618 |
| Malignant neoplasm of larynx, unspecified site | 1619 |
| Malignant neoplasm of trachea | 1620 |
| Malignant neoplasm of main bronchus | 1622 |
| Malignant neoplasm of upper lobe, bronchus, or lung | 1623 |
| Malignant neoplasm of middle lobe, bronchus, or lung | 1624 |
| Malignant neoplasm of lower lobe, bronchus, or lung | 1625 |
| Malignant neoplasm of other parts of bronchus or lung | 1628 |
| Malignant neoplasm of bronchus and lung, unspecified site | 1629 |
| Malignant neoplasm of other specified sites of pleura | 1638 |
| Malignant neoplasm of pleura, unspecified site | 1639 |
| Malignant neoplasm of thymus | 1640 |
| Malignant neoplasm of heart | 1641 |
| Malignant neoplasm of mediastinum, part unspecified | 1649 |
| Malignant neoplasm of bone and articular cartilage, site unspecified | 1709 |
| Malignant neoplasm of connective and other soft tissue of head, face, and neck | 1710 |
| Malignant neoplasm of connective and other soft tissue of upper limb, including shoulder | 1712 |
| Malignant neoplasm of connective and other soft tissue of lower limb, including hip | 1713 |
| Malignant neoplasm of connective and other soft tissue of thorax | 1714 |
| Malignant neoplasm of connective and other soft tissue of abdomen | 1715 |
| Malignant neoplasm of connective and other soft tissue, site unspecified | 1719 |
| Malignant melanoma of skin of ear and external auditory canal | 1722 |
| Malignant melanoma of skin of other and unspecified parts of face | 1723 |
| Malignant melanoma of skin of scalp and neck | 1724 |
| Malignant melanoma of skin of trunk, except scrotum | 1725 |
| Malignant melanoma of skin of upper limb, including shoulder | 1726 |
| Malignant melanoma of skin of lower limb, including hip | 1727 |
| Malignant melanoma of other specified sites of skin | 1728 |
| Melanoma of skin, site unspecified | 1729 |
| Other malignant neoplasm of skin of lip | 1730 |
| Other malignant neoplasm of skin of eyelid, including canthus | 1731 |
| Other malignant neoplasm of skin of ear and external auditory canal | 1732 |
| Other malignant neoplasm of skin of other and unspecified parts of face | 1733 |
| Other malignant neoplasm of scalp and skin of neck | 1734 |
| Other malignant neoplasm of skin of trunk, except scrotum | 1735 |
| Other malignant neoplasm of skin of upper limb, including shoulder | 1736 |
| Other malignant neoplasm of skin of lower limb, including hip | 1737 |
| Other malignant neoplasm of other specified sites of skin | 1738 |
| Other malignant neoplasm of skin, site unspecified | 1739 |
| Malignant neoplasm of nipple and areola of female breast | 1740 |
| Malignant neoplasm of central portion of female breast | 1741 |
| Malignant neoplasm of upper-inner quadrant of female breast | 1742 |
| Malignant neoplasm of lower-inner quadrant of female breast | 1743 |
| Malignant neoplasm of upper-outer quadrant of female breast | 1744 |
| Malignant neoplasm of lower-outer quadrant of female breast | 1745 |
| Malignant neoplasm of other specified sites of female breast | 1748 |
| Malignant neoplasm of breast (female), unspecified site | 1749 |
| Malignant neoplasm of other and unspecified sites of male breast | 1759 |
| Malignant neoplasm of endocervix | 1800 |
| Malignant neoplasm of cervix uteri, unspecified site | 1809 |
| Malignant neoplasm of corpus uteri, except isthmus | 1820 |
| Malignant neoplasm of ovary | 1830 |
| Malignant neoplasm of fallopian tube | 1832 |
| Malignant neoplasm of vagina | 1840 |
| Malignant neoplasm of vulva, unspecified site | 1844 |
| Malignant neoplasm of other and unspecified testis | 1869 |
| Malignant neoplasm of penis, part unspecified | 1874 |
| Malignant neoplasm of trigone of urinary bladder | 1880 |
| Malignant neoplasm of dome of urinary bladder | 1881 |
| Malignant neoplasm of lateral wall of urinary bladder | 1882 |
| Malignant neoplasm of anterior wall of urinary bladder | 1883 |
| Malignant neoplasm of posterior wall of urinary bladder | 1884 |
| Malignant neoplasm of bladder neck | 1885 |
| Malignant neoplasm of ureteric orifice | 1886 |
| Malignant neoplasm of other specified sites of bladder | 1888 |
| Malignant neoplasm of bladder, part unspecified | 1889 |
| Malignant neoplasm of kidney, except pelvis | 1890 |
| Malignant neoplasm of renal pelvis | 1891 |
| Malignant neoplasm of ureter | 1892 |
| Malignant neoplasm of urethra | 1893 |
| Malignant neoplasm of urinary organ, site unspecified | 1899 |
| Malignant neoplasm of choroid | 1906 |
| Malignant neoplasm of cerebrum, except lobes and ventricles | 1910 |
| Malignant neoplasm of frontal lobe of brain | 1911 |
| Malignant neoplasm of temporal lobe of brain | 1912 |
| Malignant neoplasm of parietal lobe of brain | 1913 |
| Malignant neoplasm of occipital lobe of brain | 1914 |
| Malignant neoplasm of other parts of brain | 1918 |
| Malignant neoplasm of brain, unspecified site | 1919 |
| Malignant neoplasm of cerebral meninges | 1921 |
| Malignant neoplasm of adrenal gland | 1940 |
| Malignant neoplasm of head, face, and neck | 1950 |
| Malignant neoplasm of thorax | 1951 |
| Malignant neoplasm of abdomen | 1952 |
| Secondary and unspecified malignant neoplasm of lymph nodes of head, face, and neck | 1960 |
| Secondary and unspecified malignant neoplasm of intrathoracic lymph nodes | 1961 |
| Secondary and unspecified malignant neoplasm of intra-abdominal lymph nodes | 1962 |
| Secondary and unspecified malignant neoplasm of lymph nodes of axilla and upper limb | 1963 |
| Secondary and unspecified malignant neoplasm of lymph nodes of inguinal region and lower limb | 1965 |
| Secondary malignant neoplasm of lung | 1970 |
| Secondary malignant neoplasm of mediastinum | 1971 |
| Secondary malignant neoplasm of pleura | 1972 |
| Secondary malignant neoplasm of small intestine including duodenum | 1974 |
| Secondary malignant neoplasm of large intestine and rectum | 1975 |
| Secondary malignant neoplasm of retroperitoneum and peritoneum | 1976 |
| Secondary malignant neoplasm of liver | 1977 |
| Secondary malignant neoplasm of other digestive organs and spleen | 1978 |
| Secondary malignant neoplasm of kidney | 1980 |
| Secondary malignant neoplasm of other urinary organs | 1981 |
| Secondary malignant neoplasm of skin | 1982 |
| Secondary malignant neoplasm of brain and spinal cord | 1983 |
| Secondary malignant neoplasm of other parts of nervous system | 1984 |
| Secondary malignant neoplasm of bone and bone marrow | 1985 |
| Secondary malignant neoplasm of adrenal gland | 1987 |
| Disseminated malignant neoplasm | 1990 |
| Other malignant neoplasm of unspecified site | 1991 |
| Benign neoplasm of bronchus and lung | 2123 |
| Benign neoplasm of heart | 2127 |
| Benign neoplasm of brain | 2250 |
| Benign neoplasm of cerebral meninges | 2252 |
| Benign neoplasm of spinal meninges | 2254 |
| Carcinoma in situ of esophagus | 2301 |
| Carcinoma in situ of stomach | 2302 |
| Carcinoma in situ of colon | 2303 |
| Carcinoma in situ of rectum | 2304 |
| Carcinoma in situ of larynx | 2310 |
| Carcinoma in situ of bronchus and lung | 2312 |
| Carcinoma in situ of breast | 2330 |
| Carcinoma in situ of cervix uteri | 2331 |
| Carcinoma in situ of other and unspecified parts of uterus | 2332 |
| Carcinoma in situ, other and unspecified female genital organs | 2333 |
| Carcinoma in situ of prostate | 2334 |
| Carcinoma in situ of bladder | 2337 |
| Carcinoma in situ of other specified sites | 2348 |
| Neoplasm of uncertain behavior of major salivary glands | 2350 |
| Neoplasm of uncertain behavior of lip, oral cavity, and pharynx | 2351 |
| Neoplasm of uncertain behavior of stomach, intestines, and rectum | 2352 |
| Neoplasm of uncertain behavior of liver and biliary passages | 2353 |
| Neoplasm of uncertain behavior of other and unspecified digestive organs | 2355 |
| Neoplasm of uncertain behavior of larynx | 2356 |
| Neoplasm of uncertain behavior of trachea, bronchus, and lung | 2357 |
| Neoplasm of uncertain behavior of ovary | 2362 |
| Neoplasm of uncertain behavior of prostate | 2365 |
| Neoplasm of uncertain behavior of bladder | 2367 |
| Neoplasm of uncertain behavior of pituitary gland and craniopharyngeal duct | 2370 |
| Neoplasm of uncertain behavior of other and unspecified endocrine glands | 2374 |
| Neoplasm of uncertain behavior of brain and spinal cord | 2375 |
| Neoplasm of uncertain behavior of bone and articular cartilage | 2380 |
| Neoplasm of uncertain behavior of connective and other soft tissue | 2381 |
| Neoplasm of uncertain behavior of skin | 2382 |
| Neoplasm of uncertain behavior of breast | 2383 |
| Neoplasm of uncertain behavior of polycythemia vera | 2384 |
| Neoplasm of uncertain behavior of other specified sites | 2388 |
| Neoplasm of uncertain behavior, site unspecified | 2389 |
| Neoplasm of unspecified nature of digestive system | 2390 |
| Neoplasm of unspecified nature of respiratory system | 2391 |
| Neoplasms of unspecified nature of bone, soft tissue, and skin | 2392 |
| Neoplasm of unspecified nature of breast | 2393 |
| Neoplasm of unspecified nature of bladder | 2394 |
| Neoplasm of unspecified nature of other genitourinary organs | 2395 |
| Neoplasm of unspecified nature of brain | 2396 |
| Neoplasm of unspecified nature of endocrine glands and other parts of nervous system | 2397 |
| Neoplasm of unspecified nature of other specified sites | 2398 |
| Neoplasm of unspecified nature, site unspecified | 2399 |
| Acute thyroiditis | 2450 |
| Unspecified thyroiditis | 2459 |
| Hypoglycemic coma | 2510 |
| Other specified hypoglycemia | 2511 |
| Hypoglycemia, unspecified | 2512 |
| Diabetes insipidus | 2535 |
| Carcinoid syndrome | 2592 |
| Unspecified protein-calorie malnutrition | 2639 |
| Other and unspecified manifestations of thiamine deficiency | 2651 |
| Monoclonal paraproteinemia | 2731 |
| Disorders of magnesium metabolism | 2752 |
| Disorders of phosphorus metabolism | 2753 |
| Hyperosmolality and/or hypernatremia | 2760 |
| Hyposmolality and/or hyponatremia | 2761 |
| Acidosis | 2762 |
| Alkalosis | 2763 |
| Mixed acid-base balance disorder | 2764 |
| Fluid overload | 2766 |
| Hyperpotassemia | 2767 |
| Hypopotassemia | 2768 |
| Electrolyte and fluid disorders not elsewhere classified | 2769 |
| Amyloidosis | 2773 |
| Unspecified disorder of metabolism | 2779 |
| Iron deficiency anemia secondary to blood loss (chronic) | 2800 |
| Iron deficiency anemia secondary to inadequate dietary iron intake | 2801 |
| Other specified iron deficiency anemias | 2808 |
| Unspecified iron deficiency anemia | 2809 |
| Pernicious anemia | 2810 |
| Other vitamin B12 deficiency anemia | 2811 |
| Folate-deficiency anemia | 2812 |
| Other specified megaloblastic anemias not elsewhere classified | 2813 |
| Anemia associated with other specified nutritional deficiency | 2818 |
| Unspecified deficiency anemia | 2819 |
| Autoimmune hemolytic anemias | 2830 |
| Acquired hemolytic anemia, unspecified | 2839 |
| Pancytopenia | 2841 |
| Other specified aplastic anemias | 2848 |
| Unspecified aplastic anemia | 2849 |
| Sideroblastic anemia | 2850 |
| Acute posthemorrhagic anemia | 2851 |
| Chemotherapy induced anemia | 2853 |
| Other specified anemias | 2858 |
| Unspecified anemia | 2859 |
| Hemorrhagic disorder due to intrinsic circulating anticoagulants | 2865 |
| Defibrination syndrome | 2866 |
| Unspecified hemorrhagic conditions | 2879 |
| Polycythemia, secondary | 2890 |
| Senile dementia with delirium | 2903 |
| Unspecified senile psychotic condition | 2909 |
| Alcohol withdrawal delirium | 2910 |
| Drug withdrawal | 2920 |
| Unspecified drug-induced mental disorder | 2929 |
| Delirium due to conditions classified elsewhere | 2930 |
| Subacute delirium | 2931 |
| Unspecified transient mental disorder in conditions classified elsewhere | 2939 |
| Other persistent mental disorders due to conditions classified elsewhere | 2948 |
| Unspecified persistent mental disorders due to conditions classified elsewhere | 2949 |
| Bipolar I disorder, most recent episode (or current) unspecified | 2967 |
| Delusional disorder | 2971 |
| Unspecified paranoid state | 2979 |
| Reactive confusion | 2982 |
| Other and unspecified reactive psychosis | 2988 |
| Unspecified psychosis | 2989 |
| Obsessive-compulsive disorders | 3003 |
| Dysthymic disorder | 3004 |
| Unspecified nonpsychotic mental disorder | 3009 |
| Respiratory malfunction arising from mental factors | 3061 |
| Cardiovascular malfunction arising from mental factors | 3062 |
| Anorexia nervosa | 3071 |
| Predominant disturbance of emotions | 3080 |
| Unspecified acute reaction to stress | 3089 |
| Adjustment disorder with depressed mood | 3090 |
| Prolonged depressive reaction as adjustment reaction | 3091 |
| Adjustment disorder with mixed disturbance of emotions and conduct | 3094 |
| Unspecified adjustment reaction | 3099 |
| Personality change due to conditions classified elsewhere | 3101 |
| Postconcussion syndrome | 3102 |
| Unspecified nonpsychotic mental disorder following organic brain damage | 3109 |
| Meningitis due to unspecified bacterium | 3209 |
| Unspecified meningitis | 3229 |
| Unspecified causes of encephalitis, myelitis, and encephalomyelitis | 3239 |
| Intracranial abscess | 3240 |
| Communicating hydrocephalus | 3313 |
| Obstructive hydrocephalus | 3314 |
| Idiopathic normal pressure hydrocephalus [INPH] | 3315 |
| Paralysis agitans | 3320 |
| Secondary Parkinsonism | 3321 |
| Neoplasm related pain (acute) (chronic) | 3383 |
| Unspecified infantile cerebral palsy | 3439 |
| Unspecified paralysis | 3449 |
| Anoxic brain damage | 3481 |
| Benign intracranial hypertension | 3482 |
| Cerebral edema | 3485 |
| Atypical face pain | 3502 |
| Unspecified inflammatory and toxic neuropathy | 3579 |
| Toxic myopathy | 3594 |
| Unspecified visual disturbance | 3689 |
| Unspecified visual loss | 3699 |
| Unspecified staphylococcal septicemia | 03810 |
| Methicillin susceptible Staphylococcus aureus septicemia | 03811 |
| Methicillin resistant Staphylococcus aureus septicemia | 03812 |
| Other staphylococcal septicemia | 03819 |
| Septicemia due to unspecified gram-negative organism | 03840 |
| Septicemia due to hemophilus influenzae (H. influenzae) | 03841 |
| Septicemia due to Escherichia coli (E. coli) | 03842 |
| Septicemia due to pseudomonas | 03843 |
| Septicemia due to serratia | 03844 |
| Other septicemia due to gram-negative organism | 03849 |
| Acute rheumatic pericarditis | 3910 |
| Acute rheumatic endocarditis | 3911 |
| Other acute rheumatic heart disease | 3918 |
| Unspecified acute rheumatic heart disease | 3919 |
| Mitral stenosis | 3940 |
| Rheumatic mitral insufficiency | 3941 |
| Mitral stenosis with insufficiency | 3942 |
| Other and unspecified mitral valve diseases | 3949 |
| Rheumatic aortic stenosis | 3950 |
| Rheumatic aortic insufficiency | 3951 |
| Rheumatic aortic stenosis with insufficiency | 3952 |
| Other and unspecified rheumatic aortic diseases | 3959 |
| Mitral valve stenosis and aortic valve stenosis | 3960 |
| Mitral valve stenosis and aortic valve insufficiency | 3961 |
| Mitral valve insufficiency and aortic valve stenosis | 3962 |
| Mitral valve insufficiency and aortic valve insufficiency | 3963 |
| Multiple involvement of mitral and aortic valves | 3968 |
| Unspecified mitral and aortic valve diseases | 3969 |
| Diseases of tricuspid valve | 3970 |
| Rheumatic diseases of pulmonary valve | 3971 |
| Essential hypertension, malignant | 4010 |
| Postmyocardial infarction syndrome | 4110 |
| Intermediate coronary syndrome | 4111 |
| Angina decubitus | 4130 |
| Prinzmetal angina | 4131 |
| Other and unspecified angina pectoris | 4139 |
| Chronic total occlusion of coronary artery | 4142 |
| Coronary atherosclerosis due to lipid rich plaque | 4143 |
| Other specified forms of chronic ischemic heart disease | 4148 |
| Unspecified chronic ischemic heart disease | 4149 |
| Acute cor pulmonale | 4150 |
| Primary pulmonary hypertension | 4160 |
| Chronic pulmonary embolism | 4162 |
| Other chronic pulmonary heart diseases | 4168 |
| Unspecified chronic pulmonary heart disease | 4169 |
| Arteriovenous fistula of pulmonary vessels | 4170 |
| Aneurysm of pulmonary artery | 4171 |
| Other specified disease of pulmonary circulation | 4178 |
| Unspecified disease of pulmonary circulation | 4179 |
| Acute pericarditis in diseases classified elsewhere | 4200 |
| Acute and subacute bacterial endocarditis | 4210 |
| Acute and subacute infective endocarditis in diseases classified elsewhere | 4211 |
| Unspecified acute endocarditis | 4219 |
| Hemopericardium | 4230 |
| Adhesive pericarditis | 4231 |
| Constrictive pericarditis | 4232 |
| Cardiac tamponade | 4233 |
| Other specified diseases of pericardium | 4238 |
| Unspecified disease of pericardium | 4239 |
| Mitral valve disorders | 4240 |
| Aortic valve disorders | 4241 |
| Tricuspid valve disorders, specified as nonrheumatic | 4242 |
| Pulmonary valve disorders | 4243 |
| Endomyocardial fibrosis | 4250 |
| Hypertrophic obstructive cardiomyopathy | 4251 |
| Obscure cardiomyopathy of Africa | 4252 |
| Endocardial fibroelastosis | 4253 |
| Other primary cardiomyopathies | 4254 |
| Alcoholic cardiomyopathy | 4255 |
| Nutritional and metabolic cardiomyopathy | 4257 |
| Cardiomyopathy in other diseases classified elsewhere | 4258 |
| Unspecified secondary cardiomyopathy | 4259 |
| Atrioventricular block, complete | 4260 |
| Left bundle branch hemiblock | 4262 |
| Other left bundle branch block | 4263 |
| Right bundle branch block | 4264 |
| Other heart block | 4266 |
| Anomalous atrioventricular excitation | 4267 |
| Unspecified conduction disorder | 4269 |
| Paroxysmal supraventricular tachycardia | 4270 |
| Paroxysmal ventricular tachycardia | 4271 |
| Unspecified paroxysmal tachycardia | 4272 |
| Cardiac arrest | 4275 |
| Unspecified cardiac dysrhythmia | 4279 |
| Congestive heart failure, unspecified | 4280 |
| Left heart failure | 4281 |
| Unspecified heart failure | 4289 |
| Unspecified myocarditis | 4290 |
| Myocardial degeneration | 4291 |
| Unspecified cardiovascular disease | 4292 |
| Cardiomegaly | 4293 |
| Functional disturbances following cardiac surgery | 4294 |
| Rupture of chordae tendineae | 4295 |
| Rupture of papillary muscle | 4296 |
| Unspecified heart disease | 4299 |
| Nontraumatic extradural hemorrhage | 4320 |
| Subdural hemorrhage | 4321 |
| Unspecified intracranial hemorrhage | 4329 |
| Basilar artery syndrome | 4350 |
| Vertebral artery syndrome | 4351 |
| Subclavian steal syndrome | 4352 |
| Vertebrobasilar artery syndrome | 4353 |
| Other specified transient cerebral ischemias | 4358 |
| Unspecified transient cerebral ischemia | 4359 |
| Cerebral atherosclerosis | 4370 |
| Other generalized ischemic cerebrovascular disease | 4371 |
| Hypertensive encephalopathy | 4372 |
| Cerebral aneurysm, nonruptured | 4373 |
| Transient global amnesia | 4377 |
| Unspecified cerebrovascular disease | 4379 |
| Atherosclerosis of aorta | 4400 |
| Atherosclerosis of renal artery | 4401 |
| Chronic total occlusion of artery of the extremities | 4404 |
| Atherosclerosis of other specified arteries | 4408 |
| Generalized and unspecified atherosclerosis | 4409 |
| Thoracic aneurysm, ruptured | 4411 |
| Thoracic aneurysm without mention of rupture | 4412 |
| Abdominal aneurysm, ruptured | 4413 |
| Abdominal aneurysm without mention of rupture | 4414 |
| Aortic aneurysm of unspecified site, ruptured | 4415 |
| Thoracoabdominal aneurysm, ruptured | 4416 |
| Thoracoabdominal aneurysm without mention of rupture | 4417 |
| Aortic aneurysm of unspecified site without mention of rupture | 4419 |
| Aneurysm of artery of upper extremity | 4420 |
| Aneurysm of renal artery | 4421 |
| Aneurysm of iliac artery | 4422 |
| Aneurysm of artery of lower extremity | 4423 |
| Other aneurysm of unspecified site | 4429 |
| Thromboangiitis obliterans (Buerger's disease) | 4431 |
| Embolism and thrombosis of abdominal aorta | 4440 |
| Embolism and thrombosis of thoracic aorta | 4441 |
| Embolism and thrombosis of unspecified artery | 4449 |
| Polyarteritis nodosa | 4460 |
| Wegener's granulomatosis | 4464 |
| Giant cell arteritis | 4465 |
| Takayasu's disease | 4467 |
| Stricture of artery | 4471 |
| Rupture of artery | 4472 |
| Celiac artery compression syndrome | 4474 |
| Unspecified arteritis | 4476 |
| Other specified disorders of arteries and arterioles | 4478 |
| Unspecified disorders of arteries and arterioles | 4479 |
| Embolism and thrombosis of vena cava | 4532 |
| Emb/throm superficial lower ext | 4536 |
| Venous embolism and thrombosis of other specified veins | 4538 |
| Embolism and thrombosis of unspecified site | 4539 |
| Esophageal varices with bleeding | 4560 |
| Other noninfectious lymphedema | 4571 |
| Orthostatic hypotension | 4580 |
| Chronic hypotension | 4581 |
| Other specified hypotension | 4588 |
| Unspecified hypotension | 4589 |
| Unspecified hemorrhage | 4590 |
| Unspecified circulatory system disorder | 4599 |
| Acute upper respiratory infections of other multiple sites | 4658 |
| Acute upper respiratory infections of unspecified site | 4659 |
| Acute bronchitis | 4660 |
| Other and unspecified diseases of upper respiratory tract | 4789 |
| Emphysematous bleb | 4920 |
| Other emphysema | 4928 |
| Bronchiectasis with acute exacerbation | 4941 |
| Acute pulmonary edema due to fumes and vapors | 5061 |
| Other acute and subacute respiratory conditions due to fumes and vapors | 5063 |
| Acute pulmonary manifestations due to radiation | 5080 |
| Empyema without mention of fistula | 5109 |
| Pleurisy without mention of effusion or current tuberculosis | 5110 |
| Pleurisy with effusion, with mention of bacterial cause other than tuberculosis | 5111 |
| Other specified forms of pleural effusion, except tuberculous | 5118 |
| Unspecified pleural effusion | 5119 |
| Spontaneous tension pneumothorax | 5120 |
| Iatrogenic pneumothorax | 5121 |
| Other spontaneous pneumothorax | 5128 |
| Abscess of lung | 5130 |
| Idiopathic fibrosing alveolitis | 5163 |
| Other specified alveolar and parietoalveolar pneumonopathies | 5168 |
| Acute chest syndrome | 5173 |
| Lung involvement in other diseases classified elsewhere | 5178 |
| Pulmonary collapse | 5180 |
| Compensatory emphysema | 5182 |
| Pulmonary eosinophilia | 5183 |
| Unspecified acute edema of lung | 5184 |
| Pulmonary insufficiency following trauma and surgery | 5185 |
| Other diseases of trachea and bronchus, not elsewhere classified | 5191 |
| Other diseases of respiratory system, not elsewhere classified | 5198 |
| Unspecified disease of respiratory system | 5199 |
| Inflammatory conditions of jaw | 5264 |
| Achalasia and cardiospasm | 5300 |
| Stricture and stenosis of esophagus | 5303 |
| Perforation of esophagus | 5304 |
| Gastroesophageal laceration-hemorrhage syndrome | 5307 |
| Unspecified disorder of esophagus | 5309 |
| Dyspepsia and other specified disorders of function of stomach | 5368 |
| Acute appendicitis with generalized peritonitis | 5400 |
| Acute appendicitis with peritoneal abscess | 5401 |
| Acute appendicitis without mention of peritonitis | 5409 |
| Hernia of other specified site, with obstruction | 5528 |
| Acute vascular insufficiency of intestine | 5570 |
| Volvulus | 5602 |
| Unspecified intestinal obstruction | 5609 |
| Unspecified peritonitis | 5679 |
| Hemorrhage of rectum and anus | 5693 |
| Abscess of liver | 5720 |
| Hepatic coma | 5722 |
| Portal hypertension | 5723 |
| Acute cholecystitis | 5750 |
| Perforation of gallbladder | 5754 |
| Cholangitis | 5761 |
| Acute pancreatitis | 5770 |
| Chronic pancreatitis | 5771 |
| Hematemesis | 5780 |
| Blood in stool | 5781 |
| Hemorrhage of gastrointestinal tract, unspecified | 5789 |
| Other and unspecified postsurgical nonabsorption | 5793 |
| Acute renal failure with lesion of tubular necrosis | 5845 |
| Acute renal failure with lesion of renal cortical necrosis | 5846 |
| Acute renal failure with other specified pathological lesion in kidney | 5848 |
| End stage renal disease | 5856 |
| Hemorrhage into bladder wall | 5967 |
| Excessive or frequent menstruation | 6262 |
| Other disorder of menstruation and other abnormal bleeding from female genital tract | 6268 |
| Postmenopausal bleeding | 6271 |
| West Nile fever with encephalitis | 06641 |
| Lupus erythematosus | 6954 |
| Circumscribed scleroderma | 7010 |
| Chronic hepatitis C with hepatic coma | 07044 |
| Systemic lupus erythematosus | 7100 |
| Unspecified diffuse connective tissue disease | 7109 |
| Pain in thoracic spine | 7241 |
| Lumbago | 7242 |
| Thoracic or lumbosacral neuritis or radiculitis, unspecified | 7244 |
| Unspecified backache | 7245 |
| Other symptoms referable to back | 7248 |
| Other affections of shoulder region, not elsewhere classified | 7262 |
| Tietze's disease | 7336 |
| Nonallopathic lesion of thoracic region, not elsewhere classified | 7392 |
| Bulbus cordis anomalies and anomalies of cardiac septal closure, common truncus | 7450 |
| Tetralogy of Fallot | 7452 |
| Bulbus cordis anomalies and anomalies of cardiac septal closure, common ventricle | 7453 |
| Ventricular septal defect | 7454 |
| Ostium secundum type atrial septal defect | 7455 |
| Unspecified congenital defect of septal closure | 7459 |
| Congenital tricuspid atresia and stenosis | 7461 |
| Ebstein's anomaly | 7462 |
| Congenital stenosis of aortic valve | 7463 |
| Congenital insufficiency of aortic valve | 7464 |
| Congenital mitral stenosis | 7465 |
| Congenital mitral insufficiency | 7466 |
| Hypoplastic left heart syndrome | 7467 |
| Unspecified congenital anomaly of heart | 7469 |
| Patent ductus arteriosus | 7470 |
| Congenital anomalies of pulmonary artery | 7473 |
| Congenital tracheoesophageal fistula, esophageal atresia and stenosis | 7503 |
| Down's syndrome | 7580 |
| Hallucinations | 7801 |
| Syncope and collapse | 7802 |
| Dizziness and giddiness | 7804 |
| Transient paralysis of limb | 7814 |
| Edema | 7823 |
| Cyanosis | 7825 |
| Anorexia | 7830 |
| Polydipsia | 7835 |
| Adult failure to thrive | 7837 |
| Other speech disturbance | 7845 |
| Unspecified tachycardia | 7850 |
| Palpitations | 7851 |
| Undiagnosed cardiac murmurs | 7852 |
| Other abnormal heart sounds | 7853 |
| Gangrene | 7854 |
| Other symptoms involving cardiovascular system | 7859 |
| Stridor | 7861 |
| Cough | 7862 |
| Hemoptysis | 7863 |
| Abnormal chest sounds | 7867 |
| Other symptoms involving respiratory system and chest | 7869 |
| Heartburn | 7871 |
| Dysphagia | 7872 |
| Nonspecific elevation of levels of transaminase or lactic acid dehydrogenase (LDH) | 7904 |
| Other nonspecific abnormal serum enzyme levels | 7905 |
| Other abnormal blood chemistry | 7906 |
| Bacteremia | 7907 |
| Nonspecific abnormal findings on radiological and other examination of lung field | 7931 |
| Nonspecific abnormal findings on radiological and other examination of other intrathoracic organs | 7932 |
| Nonspecific abnormal results of pulmonary system function study | 7942 |
| Nonspecific abnormal toxicological findings | 7960 |
| Nonspecific low blood pressure reading | 7963 |
| Respiratory arrest | 7991 |
| Cachexia | 7994 |
| Closed fracture of dorsal (thoracic) vertebra without mention of spinal cord injury | 8052 |
| Closed fracture of lumbar spine with spinal cord injury | 8064 |
| Closed fracture of sternum | 8072 |
| Flail chest | 8074 |
| Closed fracture of acetabulum | 8080 |
| Closed fracture of pubis | 8082 |
| Unspecified closed fracture of pelvis | 8088 |
| Ill-defined closed fractures of upper limb | 8180 |
| Closed fracture of unspecified part of neck of femur | 8208 |
| Open fracture of unspecified part of neck of femur | 8209 |
| Sprain and strain of other specified sites of shoulder and upper arm | 8408 |
| Sprain and strain of unspecified site of shoulder and upper arm | 8409 |
| Thoracic sprain and strain | 8471 |
| Sprain and strain of unspecified site of back | 8479 |
| Sprain and strain of ribs | 8483 |
| Concussion with loss of consciousness of unspecified duration | 8505 |
| Unspecified concussion | 8509 |
| Traumatic pneumothorax without mention of open wound into thorax | 8600 |
| Traumatic hemothorax without mention of open wound into thorax | 8602 |
| Traumatic pneumohemothorax without mention of open wound into thorax | 8604 |
| Injury to multiple and unspecified intrathoracic organs without mention of open wound into cavity | 8628 |
| Thoracic aorta injury | 9010 |
| Late effect of adverse effect of drug, medical or biological substance | 9095 |
| Contusion of breast | 9220 |
| Contusion of chest wall | 9221 |
| Contusion of abdominal wall | 9222 |
| Contusion of unspecified part of trunk | 9229 |
| Syphilitic endocarditis, aortic valve | 09322 |
| Foreign body in trachea | 9340 |
| Foreign body in main bronchus | 9341 |
| Foreign body in other specified parts of trachea, bronchus, and lung | 9348 |
| Unspecified site of spinal cord injury without spinal bone injury | 9529 |
| Traumatic shock | 9584 |
| Injury, other and unspecified, shoulder and upper arm | 9592 |
| Injury, other and unspecified, other specified sites, including multiple | 9598 |
| Poisoning by adrenal cortical steroids | 9620 |
| Poisoning by insulins and antidiabetic agents | 9623 |
| Poisoning by antiallergic and antiemetic drugs | 9630 |
| Poisoning by antineoplastic and immunosuppressive drugs | 9631 |
| Poisoning by anticoagulants | 9642 |
| Poisoning by salicylates | 9651 |
| Poisoning by aromatic analgesics, not elsewhere classified | 9654 |
| Poisoning by other specified analgesics and antipyretics | 9658 |
| Poisoning by unspecified analgesic and antipyretic | 9659 |
| Poisoning by hydantoin derivatives | 9661 |
| Poisoning by other and unspecified anticonvulsants | 9663 |
| Poisoning by barbiturates | 9670 |
| Poisoning by other sedatives and hypnotics | 9678 |
| Poisoning by unspecified sedative or hypnotic | 9679 |
| Poisoning by central nervous system muscle-tone depressants | 9680 |
| Poisoning by surface (topical) and infiltration anesthetics | 9685 |
| Poisoning by antidepressants | 9690 |
| Poisoning by phenothiazine-based tranquilizers | 9691 |
| Poisoning by butyrophenone-based tranquilizers | 9692 |
| Poisoning by other antipsychotics, neuroleptics, and major tranquilizers | 9693 |
| Poisoning by benzodiazepine-based tranquilizers | 9694 |
| Poisoning by other tranquilizers | 9695 |
| Poisoning by psychodysleptics (hallucinogens) | 9696 |
| Poisoning by psychostimulants | 9697 |
| Poisoning by other specified psychotropic agents | 9698 |
| Poisoning by opiate antagonists | 9701 |
| Poisoning by other specified central nervous system stimulants | 9708 |
| Poisoning by parasympathomimetics (cholinergics) | 9710 |
| Poisoning by parasympatholytics (anticholinergics and antimuscarinics) and spasmolytics | 9711 |
| Poisoning by sympathomimetics (adrenergics) | 9712 |
| Poisoning by sympatholytics (antiadrenergics) | 9713 |
| Poisoning by cardiac rhythm regulators | 9720 |
| Poisoning by cardiotonic glycosides and drugs of similar action | 9721 |
| Poisoning by antilipemic and antiarteriosclerotic drugs | 9722 |
| Poisoning by coronary vasodilators | 9724 |
| Poisoning by other antihypertensive agents | 9726 |
| Poisoning by other and unspecified agents primarily affecting the cardiovascular system | 9729 |
| Poisoning by other diuretics | 9744 |
| Poisoning by electrolytic, caloric, and water-balance agents | 9745 |
| Poisoning by skeletal muscle relaxants | 9752 |
| Poisoning by antitussives | 9754 |
| Poisoning by other specified drugs and medicinal substances | 9778 |
| Poisoning by unspecified drug or medicinal substance | 9779 |
| Toxic effect of ethyl alcohol | 9800 |
| Toxic effect of isopropyl alcohol | 9802 |
| Toxic effect of unspecified alcohol | 9809 |
| Toxic effect of other nonpetroleum-based solvents | 9828 |
| Toxic effect of caustic, unspecified | 9839 |
| Toxic effect of other specified metals | 9858 |
| Toxic effect of other specified gases, fumes, or vapors | 9878 |
| Toxic effect of unspecified gas, fume, or vapor | 9879 |
| Toxic effect of other pesticides, not elsewhere classified | 9894 |
| Toxic effect of venom | 9895 |
| Toxic effect of unspecified substance, chiefly nonmedicinal as to source | 9899 |
| Effects of hypothermia | 9916 |
| Heat stroke and sunstroke | 9920 |
| Heat syncope | 9921 |
| Heat exhaustion, anhydrotic | 9923 |
| Heat exhaustion, unspecified | 9925 |
| Other specified heat effects | 9928 |
| Unspecified effects of heat and light | 9929 |
| Other and unspecified effects of high altitude | 9932 |
| Effects of lightning | 9940 |
| Drowning and nonfatal submersion | 9941 |
| Exhaustion due to excessive exertion | 9945 |
| Electrocution and nonfatal effects of electric current | 9948 |
| Other anaphylactic shock not elsewhere classified | 9950 |
| Angioneurotic edema not elsewhere classified | 9951 |
| Other and unspecified adverse effect of drug, medicinal and biological substance | 9952 |
| Mechanical complication of other vascular device, implant, and graft | 9961 |
| Cardiac complications | 9971 |
| Respiratory complications | 9973 |
| Postoperative shock, not elsewhere classified | 9980 |
| Accidental puncture or laceration during procedure | 9982 |
| Other infusion and transfusion reaction | 9998 |
| Candidiasis of the esophagus | 11284 |
| Secondary malignant neoplasm of breast | 19881 |
| Secondary malignant neoplasm of genital organs | 19882 |
| Secondary malignant neoplasm of other specified sites | 19889 |
| Mantle cell lymphoma, unspecified site, extranodal and solid organ sites | 20040 |
| Large cell lymphoma, unspecified site, extranodal and solid organ sites | 20070 |
| Hodgkin's disease, unspecified type, unspecified site, extranodal and solid organ sites | 20190 |
| Nodular lymphoma, unspecified site, extranodal and solid organ sites | 20200 |
| Nodular lymphoma of lymph nodes of head, face, and neck | 20201 |
| Nodular lymphoma of intra-abdominal lymph nodes | 20203 |
| Nodular lymphoma of lymph nodes of multiple sites | 20208 |
| Mycosis fungoides, unspecified site, extranodal and solid organ sites | 20210 |
| Leukemic reticuloendotheliosis, unspecified site, extranodal and solid organ sites | 20240 |
| Other malignant lymphomas, unspecified site, extranodal and solid organ sites | 20280 |
| Other malignant lymphomas of lymph nodes of head, face, and neck | 20281 |
| Other malignant lymphomas of intrathoracic lymph nodes | 20282 |
| Other malignant lymphomas of intra-abdominal lymph nodes | 20283 |
| Other malignant lymphomas of lymph nodes of axilla and upper limb | 20284 |
| Other malignant lymphomas of lymph nodes of inguinal region and lower limb | 20285 |
| Other malignant lymphomas of lymph nodes of multiple sites | 20288 |
| Multiple myeloma, without mention of having achieved remission | 20300 |
| Multiple myeloma in remission | 20301 |
| Acute lymphoid leukemia, without mention of having achieved remission | 20400 |
| Chronic lymphoid leukemia, without mention of having achieved remission | 20410 |
| Chronic lymphoid leukemia in remission | 20411 |
| Unspecified lymphoid leukemia, without mention of having achieved remission | 20490 |
| Acute myeloid leukemia, without mention of having achieved remission | 20500 |
| Acute myeloid leukemia in remission | 20501 |
| Chronic myeloid leukemia, without mention of having achieved remission | 20510 |
| Acute leukemia of unspecified cell type, without mention of having achieved remission | 20800 |
| Chronic leukemia of unspecified cell type, without mention of having achieved remission | 20810 |
| Unspecified leukemia, without mention of having achieved remission | 20890 |
| Malignant carcinoid tumor of the bronchus and lung | 20921 |
| Carcinoma in situ, vulva | 23332 |
| Neoplasm of uncertain behavior of kidney and ureter | 23691 |
| Low grade myelodysplastic syndrome lesions | 23872 |
| High grade myelodysplastic syndrome lesions | 23873 |
| Myelodysplastic syndrome, unspecified | 23875 |
| Myelofibrosis with myeloid metaplasia | 23876 |
| Neoplasms of unspecified nature, other specified sites | 23989 |
| Thyrotoxicosis of other specified origin without mention of thyrotoxic crisis or storm | 24280 |
| Thyrotoxicosis without mention of goiter or other cause, without mention of thyrotoxic crisis or storm | 24290 |
| Thyrotoxicosis without mention of goiter or other cause, with mention of thyrotoxic crisis | 24291 |
| Diabetes with ketoacidosis, type II or unspecified type, not stated as uncontrolled | 25010 |
| Diabetes with ketoacidosis, type I [juvenile type], not stated as uncontrolled | 25011 |
| Diabetes with ketoacidosis, type II or unspecified type, uncontrolled | 25012 |
| Diabetes with ketoacidosis, type I [juvenile type], uncontrolled | 25013 |
| Diabetes with hyperosmolarity, type II or unspecified type, not stated as uncontrolled | 25020 |
| Diabetes with hyperosmolarity, type II or unspecified type, uncontrolled | 25022 |
| Diabetes with other coma, type II or unspecified type, not stated as uncontrolled | 25030 |
| Diabetes with other coma, type II or unspecified type, uncontrolled | 25032 |
| Diabetes with other coma, type I [juvenile type], uncontrolled | 25033 |
| Glucocorticoid deficiency | 25541 |
| Unspecified disorder of calcium metabolism | 27540 |
| Hypocalcemia | 27541 |
| Hypercalcemia | 27542 |
| Other disorders of calcium metabolism | 27549 |
| Volume depletion, unspecified | 27650 |
| Dehydration | 27651 |
| Hypovolemia | 27652 |
| Fluid Overload NEC (Other Fluid Overload) | 27669 |
| Cystic fibrosis without mention of meconium ileus | 27700 |
| Cystic fibrosis with pulmonary manifestations | 27702 |
| Amyloidosis, unspecified | 27730 |
| Other amyloidosis | 27739 |
| Other thalassemia | 28249 |
| Sickle-cell disease, unspecified | 28260 |
| Hb-SS disease with crisis | 28262 |
| Sickle-cell/Hb-C disease with crisis | 28264 |
| Other sickle-cell disease with crisis | 28269 |
| Other non-autoimmune hemolytic anemias | 28319 |
| Other pancytopenia | 28419 |
| Red cell aplasia (acquired) (adult) (with thymoma) | 28481 |
| Other specified aplastic anemias | 28489 |
| Anemia in chronic kidney disease | 28521 |
| Anemia in neoplastic disease | 28522 |
| Anemia of other chronic disease | 28529 |
| Neutropenia, unspecified | 28800 |
| Myelofibrosis | 28983 |
| Vascular dementia, with delirium | 29041 |
| Alcohol withdrawal | 29181 |
| Drug-induced psychotic disorder with hallucinations | 29212 |
| Drug-induced delirium | 29281 |
| Drug-induced mood disorder | 29284 |
| Other specified drug-induced mental disorder | 29289 |
| Mood disorder in conditions classified elsewhere | 29383 |
| Anxiety disorder in conditions classified elsewhere | 29384 |
| Simple schizophrenia, unspecified condition | 29500 |
| Catatonic schizophrenia, unspecified condition | 29520 |
| Paranoid schizophrenia, unspecified condition | 29530 |
| Paranoid schizophrenia, chronic condition | 29532 |
| Paranoid schizophrenia, chronic condition with acute exacerbation | 29534 |
| Schizophreniform disorder, unspecified | 29540 |
| Schizophrenic disorders, residual type, unspecified | 29560 |
| Schizoaffective disorder, unspecified | 29570 |
| Schizoaffective disorder, chronic | 29572 |
| Schizoaffective disorder, chronic with acute exacerbation | 29574 |
| Other specified types of schizophrenia, unspecified condition | 29580 |
| Other specified types of schizophrenia, chronic condition with acute exacerbation | 29584 |
| Unspecified schizophrenia, unspecified condition | 29590 |
| Unspecified schizophrenia, chronic condition | 29592 |
| Unspecified schizophrenia, chronic condition with acute exacerbation | 29594 |
| Bipolar I disorder, single manic episode, unspecified | 29600 |
| Major depressive disorder, single episode, unspecified | 29620 |
| Major depressive disorder, single episode, mild | 29621 |
| Major depressive disorder, single episode, moderate | 29622 |
| Major depressive disorder, single episode, severe, without mention of psychotic behavior | 29623 |
| Major depressive disorder, single episode, severe, specified as with psychotic behavior | 29624 |
| Major depressive disorder, recurrent episode, unspecified | 29630 |
| Major depressive disorder, recurrent episode, mild | 29631 |
| Major depressive disorder, recurrent episode, moderate | 29632 |
| Major depressive disorder, recurrent episode, severe, without mention of psychotic behavior | 29633 |
| Major depressive disorder, recurrent episode, severe, specified as with psychotic behavior | 29634 |
| Bipolar I disorder, most recent episode (or current) manic, unspecified | 29640 |
| Bipolar I disorder, most recent episode (or current) manic, severe, without mention of psychotic behavior | 29643 |
| Bipolar I disorder, most recent episode (or current) manic, severe, specified as with psychotic behavior | 29644 |
| Bipolar I disorder, most recent episode (or current) depressed, unspecified | 29650 |
| Bipolar I disorder, most recent episode (or current) depressed, moderate | 29652 |
| Bipolar I disorder, most recent episode (or current) depressed, severe, without mention of psychotic behavior | 29653 |
| Bipolar I disorder, most recent episode (or current) depressed, severe, specified as with psychotic behavior | 29654 |
| Bipolar I disorder, most recent episode (or current) mixed, unspecified | 29660 |
| Bipolar I disorder, most recent episode (or current) mixed, moderate | 29662 |
| Bipolar I disorder, most recent episode (or current) mixed, severe, without mention of psychotic behavior | 29663 |
| Bipolar I disorder, most recent episode (or current) mixed, severe, specified as with psychotic behavior | 29664 |
| Bipolar disorder, unspecified | 29680 |
| Atypical depressive disorder | 29682 |
| Unspecified episodic mood disorder | 29690 |
| Other specified episodic mood disorder | 29699 |
| Autistic disorder, current or active state | 29900 |
| Anxiety state, unspecified | 30000 |
| Generalized anxiety disorder | 30002 |
| Other anxiety states | 30009 |
| Conversion disorder | 30011 |
| Borderline personality disorder | 30183 |
| Acute alcoholic intoxication, unspecified drunkenness | 30300 |
| Acute alcoholic intoxication, continuous drunkenness | 30301 |
| Acute alcoholic intoxication, episodic drunkenness | 30302 |
| Other and unspecified alcohol dependence, unspecified drunkenness | 30390 |
| Other and unspecified alcohol dependence, continuous drunkenness | 30391 |
| Opioid type dependence, unspecified abuse | 30400 |
| Opioid type dependence, continuous abuse | 30401 |
| Cocaine dependence, unspecified abuse | 30420 |
| Cocaine dependence, continuous abuse | 30421 |
| Combinations of opioid type drug with any other drug dependence, continuous abuse | 30471 |
| Combinations of drug dependence excluding opioid type drug, unspecified abuse | 30480 |
| Unspecified drug dependence, unspecified abuse | 30490 |
| Nondependent alcohol abuse, unspecified drunkenness | 30500 |
| Nondependent alcohol abuse, continuous drunkenness | 30501 |
| Nondependent alcohol abuse, episodic drunkenness | 30502 |
| Nondependent cannabis abuse, unspecified | 30520 |
| Nondependent sedative, hypnotic or anxiolytic abuse, unspecified | 30540 |
| Nondependent opioid abuse, unspecified | 30550 |
| Nondependent cocaine abuse, unspecified | 30560 |
| Nondependent amphetamine or related acting sympathomimetic abuse, unspecified | 30570 |
| Other, mixed, or unspecified nondependent drug abuse, unspecified | 30590 |
| Eating disorder, unspecified | 30750 |
| Adjustment disorder with anxiety | 30924 |
| Adjustment disorder with mixed anxiety and depressed mood | 30928 |
| Posttraumatic stress disorder | 30981 |
| Impulse control disorder, unspecified | 31230 |
| Intermittent explosive disorder | 31234 |
| Attention deficit disorder of childhood without mention of hyperactivity | 31400 |
| Attention deficit disorder of childhood with hyperactivity | 31401 |
| Idiopathic sleep related nonobstructive alveolar hypoventilation | 32724 |
| Confusional arousals | 32741 |
| Subacute dyskinesia due to drugs | 33385 |
| Neuroleptic malignant syndrome | 33392 |
| Carotid sinus syndrome | 33701 |
| Acute pain due to trauma | 33811 |
| Acute post-thoracotomy pain | 33812 |
| Other acute pain | 33819 |
| Other specified paralytic syndrome | 34489 |
| Other forms of epilepsy and recurrent seizures, without mention of intractable epilepsy | 34580 |
| Migraine with aura, without mention of intractable migraine without mention of status migrainosus | 34600 |
| Migraine with aura, with intractable migraine, so stated, without mention of status migrainosus | 34601 |
| Migraine without aura, without mention of intractable migraine without mention of status migrainosus | 34610 |
| Migraine without aura, with intractable migraine, so stated, without mention of status migrainosus | 34611 |
| Variants of migraine, not elsewhere classified, without mention of intractable migraine without mention of status migrainosus | 34620 |
| Variants of migraine, not elsewhere classified, with intractable migraine, so stated, without mention of status migrainosus | 34621 |
| Chronic migraine without aura, with intractable migraine, so stated, without mention of status migrainosus | 34671 |
| Other forms of migraine, without mention of intractable migraine without mention of status migrainosus | 34680 |
| Migraine, unspecified with intractable migraine, so stated, without mention of status migrainosus | 34691 |
| Narcolepsy, without cataplexy | 34700 |
| Encephalopathy, unspecified | 34830 |
| Metabolic encephalopathy | 34831 |
| Other encephalopathy | 34839 |
| Toxic encephalopathy | 34982 |
| Myasthenia gravis without (acute) exacerbation | 35800 |
| Myasthenia gravis with (acute) exacerbation | 35801 |
| Myotonic muscular dystrophy | 35921 |
| Unspecified retinal vascular occlusion | 36230 |
| Central artery occlusion of retina | 36231 |
| Arterial branch occlusion of retina | 36232 |
| Partial arterial occlusion of retina | 36233 |
| Transient arterial occlusion of retina | 36234 |
| Central vein occlusion of retina | 36235 |
| Sudden visual loss | 36811 |
| Transient visual loss | 36812 |
| Psychophysical visual disturbances | 36816 |
| Impairment level not further specified | 36960 |
| Unspecified rheumatic heart disease | 39890 |
| Rheumatic heart failure (congestive) | 39891 |
| Other and unspecified rheumatic heart diseases | 39899 |
| Malignant hypertensive heart disease without heart failure | 40200 |
| Malignant hypertensive heart disease with heart failure | 40201 |
| Benign hypertensive heart disease without heart failure | 40210 |
| Benign hypertensive heart disease with heart failure | 40211 |
| Unspecified hypertensive heart disease without heart failure | 40290 |
| Hypertensive heart disease, unspecified, with heart failure | 40291 |
| Hypertensive heart and chronic kidney disease, malignant, without heart failure and with chronic kidney disease stage I-IV | 40400 |
| Hypertensive heart and chronic kidney disease, malignant, with heart failure and with chronic kidney disease stage I-IV | 40401 |
| Hypertensive heart and chronic kidney disease, malignant, without heart failure and with chronic kidney disease stage V | 40402 |
| Hypertensive heart and chronic kidney disease, malignant, with heart failure and with chronic kidney disease stage V | 40403 |
| Hypertensive heart and chronic kidney disease, benign, without heart failure and with chronic kidney disease stage I-IV | 40410 |
| Hypertensive heart and chronic kidney disease, benign, with heart failure and with chronic kidney disease stage I-IV | 40411 |
| Hypertensive heart and chronic kidney disease, benign, without heart failure and with chronic kidney disease stage V | 40412 |
| Hypertensive heart and chronic kidney disease, benign, with heart failure and with chronic kidney disease stage V | 40413 |
| Hypertensive heart and chronic kidney disease, unspecified, without heart failure and with chronic kidney disease stage I-IV | 40490 |
| Hypertensive heart and chronic kidney disease, unspecified, with heart failure and with chronic kidney disease stage I-IV | 40491 |
| Hypertensive heart and chronic kidney disease, unspecified, without heart failure and with chronic kidney disease stage V | 40492 |
| Hypertensive heart and chronic kidney disease, unspecified, with heart failure and with chronic kidney disease stage V | 40493 |
| Secondary renovascular hypertension, malignant | 40501 |
| Other secondary hypertension, malignant | 40509 |
| Acute myocardial infarction of anterolateral wall, episode of care unspecified | 41000 |
| Acute myocardial infarction of anterolateral wall, initial episode of care | 41001 |
| Acute myocardial infarction of anterolateral wall, subsequent episode of care | 41002 |
| Acute myocardial infarction of other anterior wall, episode of care unspecified | 41010 |
| Acute myocardial infarction of other anterior wall, initial episode of care | 41011 |
| Acute myocardial infarction of other anterior wall, subsequent episode of care | 41012 |
| Acute myocardial infarction of inferolateral wall, episode of care unspecified | 41020 |
| Acute myocardial infarction of inferolateral wall, initial episode of care | 41021 |
| Acute myocardial infarction of inferolateral wall, subsequent episode of care | 41022 |
| Acute myocardial infarction of inferoposterior wall, episode of care unspecified | 41030 |
| Acute myocardial infarction of inferoposterior wall, initial episode of care | 41031 |
| Acute myocardial infarction of inferoposterior wall, subsequent episode of care | 41032 |
| Acute myocardial infarction of other inferior wall, episode of care unspecified | 41040 |
| Acute myocardial infarction of other inferior wall, initial episode of care | 41041 |
| Acute myocardial infarction of other inferior wall, subsequent episode of care | 41042 |
| Acute myocardial infarction of other lateral wall, episode of care unspecified | 41050 |
| Acute myocardial infarction of other lateral wall, initial episode of care | 41051 |
| Acute myocardial infarction of other lateral wall, subsequent episode of care | 41052 |
| Acute myocardial infarction, true posterior wall infarction, episode of care unspecified | 41060 |
| Acute myocardial infarction, true posterior wall infarction, initial episode of care | 41061 |
| Acute myocardial infarction, true posterior wall infarction, subsequent episode of care | 41062 |
| Acute myocardial infarction, subendocardial infarction, episode of care unspecified | 41070 |
| Acute myocardial infarction, subendocardial infarction, initial episode of care | 41071 |
| Acute myocardial infarction, subendocardial infarction, subsequent episode of care | 41072 |
| Acute myocardial infarction of other specified sites, episode of care unspecified | 41080 |
| Acute myocardial infarction of other specified sites, initial episode of care | 41081 |
| Acute myocardial infarction of other specified sites, subsequent episode of care | 41082 |
| Acute myocardial infarction, unspecified site, episode of care unspecified | 41090 |
| Acute myocardial infarction, unspecified site, initial episode of care | 41091 |
| Acute myocardial infarction, unspecified site, subsequent episode of care | 41092 |
| Acute coronary occlusion without myocardial infarction | 41181 |
| Other acute and subacute form of ischemic heart disease | 41189 |
| Coronary atherosclerosis of unspecified type of vessel, native or graft | 41400 |
| Coronary atherosclerosis of native coronary artery | 41401 |
| Coronary atherosclerosis of autologous vein bypass graft | 41402 |
| Coronary atherosclerosis of nonautologous biological bypass graft | 41403 |
| Coronary atherosclerosis of artery bypass graft | 41404 |
| Coronary atherosclerosis of unspecified type of bypass graft | 41405 |
| Coronary atherosclerosis, of native coronary artery of transplanted heart | 41406 |
| Coronary atherosclerosis, of bypass graft (artery) (vein) of transplanted heart | 41407 |
| Aneurysm of heart | 41410 |
| Aneurysm of coronary vessels | 41411 |
| Dissection of coronary artery | 41412 |
| Other aneurysm of heart | 41419 |
| Iatrogenic pulmonary embolism and infarction | 41511 |
| Septic pulmonary embolism | 41512 |
| Other pulmonary embolism and infarction | 41519 |
| Unspecified acute pericarditis | 42090 |
| Acute idiopathic pericarditis | 42091 |
| Other acute pericarditis | 42099 |
| Unspecified acute myocarditis | 42290 |
| Idiopathic myocarditis | 42291 |
| Endocarditis, valve unspecified, unspecified cause | 42490 |
| Endocarditis in diseases classified elsewhere | 42491 |
| Other endocarditis, valve unspecified | 42499 |
| Hypertrophic obstructive cardiomyopathy | 42511 |
| Other hypertrophic cardiomyopathy | 42518 |
| Unspecified atrioventricular block | 42610 |
| First degree atrioventricular block | 42611 |
| Mobitz (type) II atrioventricular block | 42612 |
| Other second degree atrioventricular block | 42613 |
| Unspecified bundle branch block | 42650 |
| Right bundle branch block and left posterior fascicular block | 42651 |
| Right bundle branch block and left anterior fascicular block | 42652 |
| Other bilateral bundle branch block | 42653 |
| Trifascicular block | 42654 |
| Lown-Ganong-Levine syndrome | 42681 |
| Long QT syndrome | 42682 |
| Other specified conduction disorder | 42689 |
| Atrial fibrillation | 42731 |
| Atrial flutter | 42732 |
| Ventricular fibrillation | 42741 |
| Ventricular flutter | 42742 |
| Unspecified premature beats | 42760 |
| Supraventricular premature beats | 42761 |
| Other premature beats | 42769 |
| Sinoatrial node dysfunction | 42781 |
| Other specified cardiac dysrhythmias | 42789 |
| Unspecified systolic heart failure | 42820 |
| Acute systolic heart failure | 42821 |
| Chronic systolic heart failure | 42822 |
| Acute on chronic systolic heart failure | 42823 |
| Unspecified diastolic heart failure | 42830 |
| Acute diastolic heart failure | 42831 |
| Chronic diastolic heart failure | 42832 |
| Acute on chronic diastolic heart failure | 42833 |
| Unspecified combined systolic and diastolic heart failure | 42840 |
| Acute combined systolic and diastolic heart failure | 42841 |
| Chronic combined systolic and diastolic heart failure | 42842 |
| Acute on chronic combined systolic and diastolic heart failure | 42843 |
| Acquired cardiac septal defect | 42971 |
| Other certain sequelae of myocardial infarction, not elsewhere classified | 42979 |
| Other disorders of papillary muscle | 42981 |
| Hyperkinetic heart disease | 42982 |
| Takotsubo syndrome | 42983 |
| Other ill-defined heart disease | 42989 |
| Occlusion and stenosis of basilar artery without mention of cerebral infarction | 43300 |
| Occlusion and stenosis of basilar artery with cerebral infarction | 43301 |
| Occlusion and stenosis of carotid artery without mention of cerebral infarction | 43310 |
| Occlusion and stenosis of carotid artery with cerebral infarction | 43311 |
| Occlusion and stenosis of vertebral artery without mention of cerebral infarction | 43320 |
| Occlusion and stenosis of vertebral artery with cerebral infarction | 43321 |
| Occlusion and stenosis of multiple and bilateral precerebral arteries without mention of c | 43330 |
| Occlusion and stenosis of multiple and bilateral precerebral arteries with cerebral infarc | 43331 |
| Occlusion and stenosis of other specified precerebral artery without mention of cerebral i | 43380 |
| Occlusion and stenosis of other specified precerebral artery with cerebral infarction | 43381 |
| Occlusion and stenosis of unspecified precerebral artery without mention of cerebral infar | 43390 |
| Occlusion and stenosis of unspecified precerebral artery with cerebral infarction | 43391 |
| Cerebral thrombosis without mention of cerebral infarction | 43400 |
| Cerebral thrombosis with cerebral infarction | 43401 |
| Cerebral embolism without mention of cerebral infarction | 43410 |
| Cerebral embolism with cerebral infarction | 43411 |
| Unspecified cerebral artery occlusion without mention of cerebral infarction | 43490 |
| Unspecified cerebral artery occlusion with cerebral infarction | 43491 |
| Hemiplegia affecting unspecified side due to cerebrovascular disease | 43820 |
| Atherosclerosis of native arteries of the extremities, unspecified | 44020 |
| Atherosclerosis of native arteries of the extremities with intermittent claudication | 44021 |
| Atherosclerosis of native arteries of the extremities with rest pain | 44022 |
| Atherosclerosis of native arteries of the extremities with ulceration | 44023 |
| Atherosclerosis of native arteries of the extremities with gangrene | 44024 |
| Other atherosclerosis of native arteries of the extremities | 44029 |
| Atherosclerosis of unspecified bypass graft of extremities | 44030 |
| Atherosclerosis of autologous vein bypass graft of extremities | 44031 |
| Dissecting aortic aneurysm (any part), unspecified site | 44100 |
| Dissecting aortic aneurysm (any part), thoracic | 44101 |
| Dissecting aortic aneurysm (any part), abdominal | 44102 |
| Dissecting aortic aneurysm (any part), thoracoabdominal | 44103 |
| Aneurysm of artery of neck | 44281 |
| Aneurysm of splenic artery | 44283 |
| Aneurysm of other visceral artery | 44284 |
| Aneurysm of other specified artery | 44289 |
| Dissection of carotid artery | 44321 |
| Dissection of other artery | 44329 |
| Peripheral angiopathy in diseases classified elsewhere | 44381 |
| Embolism and thrombosis of arteries of upper extremity | 44421 |
| Embolism and thrombosis of arteries of lower extremity | 44422 |
| Embolism and thrombosis of iliac artery | 44481 |
| Embolism and thrombosis of other specified artery | 44489 |
| Atheroembolism of lower extremity | 44502 |
| Venous embolism and thrombosis of unspecified deep vessels of lower extremity | 45340 |
| Venous embolism and thrombosis of deep vessels of proximal lower extremity | 45341 |
| Venous embolism and thrombosis of deep vessels of distal lower extremity | 45342 |
| Chronic venous embolism and thrombosis of unspecified deep vessels of lower extremity | 45350 |
| Chronic venous embolism and thrombosis of deep vessels of proximal lower extremity | 45351 |
| Chronic venous embolism and thrombosis of deep vessels of distal lower extremity | 45352 |
| Acute venous embolism and thrombosis of superficial veins of upper extremity | 45381 |
| Acute venous embolism and thrombosis of deep veins of upper extremity | 45382 |
| Acute venous embolism and thrombosis of upper extremity, unspecified | 45383 |
| Acute venous embolism and thrombosis of subclavian veins | 45385 |
| Acute venous embolism and thrombosis of internal jugular veins | 45386 |
| Hypotension of hemodialysis | 45821 |
| Other iatrogenic hypotension | 45829 |
| Acute tracheitis without mention of obstruction | 46410 |
| Acute bronchiolitis due to respiratory syncytial virus (RSV) | 46611 |
| Acute bronchiolitis due to other infectious organisms | 46619 |
| Obstructive chronic bronchitis, with (acute) exacerbation | 49121 |
| Obstructive chronic bronchitis with acute bronchitis | 49122 |
| Extrinsic asthma, unspecified | 49300 |
| Extrinsic asthma with status asthmaticus | 49301 |
| Extrinsic asthma, with (acute) exacerbation | 49302 |
| Intrinsic asthma, unspecified | 49310 |
| Intrinsic asthma with status asthmaticus | 49311 |
| Intrinsic asthma, with (acute) exacerbation | 49312 |
| Chronic obstructive asthma with status asthmaticus | 49321 |
| Chronic obstructive asthma, with (acute) exacerbation | 49322 |
| Cough variant asthma | 49382 |
| Asthma, unspecified, unspecified status | 49390 |
| Asthma, unspecified with status asthmaticus | 49391 |
| Asthma, unspecified, with (acute) exacerbation | 49392 |
| Malignant pleural effusion | 51181 |
| Other specified forms of effusion, except tuberculous | 51189 |
| Other pneumothorax | 51289 |
| Acute respiratory failure following trauma and surgery | 51851 |
| Acute respiratory failure | 51881 |
| Other pulmonary insufficiency, not elsewhere classified | 51882 |
| Chronic respiratory failure | 51883 |
| Acute and chronic respiratory failure | 51884 |
| Other diseases of lung, not elsewhere classified | 51889 |
| Unspecified tracheostomy complication | 51900 |
| Mechanical complication of tracheostomy | 51902 |
| Other tracheostomy complications | 51909 |
| Acute bronchospasm | 51911 |
| Other diseases of trachea and bronchus | 51919 |
| Mucositis (ulcerative) due to antineoplastic therapy | 52801 |
| Unspecified esophagitis | 53010 |
| Reflux esophagitis | 53011 |
| Acute esophagitis | 53012 |
| Other esophagitis | 53019 |
| Ulcer of esophagus with bleeding | 53021 |
| Esophageal hemorrhage | 53082 |
| Acute gastric ulcer with hemorrhage, without mention of obstruction | 53100 |
| Acute gastric ulcer with perforation, without mention of obstruction | 53110 |
| Chronic or unspecified gastric ulcer with hemorrhage, without mention of obstruction | 53140 |
| Chronic or unspecified gastric ulcer with hemorrhage and obstruction | 53141 |
| Chronic or unspecified gastric ulcer with perforation, without mention of obstruction | 53150 |
| Chronic or unspecified gastric ulcer with hemorrhage and perforation, without mention of obstruction | 53160 |
| Gastric ulcer, unspecified as acute or chronic, without mention of hemorrhage, perforation | 53190 |
| Acute duodenal ulcer with hemorrhage, without mention of obstruction | 53200 |
| Acute duodenal ulcer with hemorrhage and perforation, without mention of obstruction | 53220 |
| Duodenal ulcer, chronic or unspecified, with hemorrhage, without mention of obstruction | 53240 |
| Chronic or unspecified duodenal ulcer with hemorrhage and obstruction | 53241 |
| Chronic or unspecified duodenal ulcer with perforation, without mention of obstruction | 53250 |
| Chronic or unspecified duodenal ulcer with hemorrhage and perforation, without mention of obstruction | 53260 |
| Acute peptic ulcer, unspecified site, with hemorrhage, without mention of obstruction | 53300 |
| Chronic or unspecified peptic ulcer, unspecified site, with hemorrhage, without mention of obstruction | 53340 |
| Chronic or unspecified gastrojejunal ulcer with hemorrhage, without mention of obstruction | 53440 |
| Acute gastritis with hemorrhage | 53501 |
| Atrophic gastritis with hemorrhage | 53511 |
| Alcoholic gastritis without mention of hemorrhage | 53530 |
| Alcoholic gastritis with hemorrhage | 53531 |
| Other specified gastritis with hemorrhage | 53541 |
| Unspecified gastritis and gastroduodenitis with hemorrhage | 53551 |
| Duodenitis with hemorrhage | 53561 |
| Angiodysplasia of stomach and duodenum with hemorrhage | 53783 |
| Dieulafoy lesion (hemorrhagic) of stomach and duodenum | 53784 |
| Inguinal hernia with gangrene, unilateral or unspecified, (not specified as recurrent) | 55000 |
| Femoral hernia with gangrene, unilateral or unspecified (not specified as recurrent) | 55100 |
| Gallstone ileus | 56031 |
| Fecal impaction | 56032 |
| Intestinal or peritoneal adhesions with obstruction (postoperative) (postinfection) | 56081 |
| Other specified intestinal obstruction | 56089 |
| Diverticulosis of small intestine with hemorrhage | 56202 |
| Diverticulosis of colon with hemorrhage | 56212 |
| Diverticulitis of colon with hemorrhage | 56213 |
| Spontaneous bacterial peritonitis | 56723 |
| Perforation of intestine | 56983 |
| Angiodysplasia of intestine with hemorrhage | 56985 |
| Dieulafoy lesion (hemorrhagic) of intestine | 56986 |
| Calculus of gallbladder with acute cholecystitis, without mention of obstruction | 57400 |
| Calculus of gallbladder with acute cholecystitis and obstruction | 57401 |
| Calculus of gallbladder with other cholecystitis, without mention of obstruction | 57410 |
| Calculus of gallbladder with other cholecystitis and obstruction | 57411 |
| Calculus of bile duct with acute cholecystitis without mention of obstruction | 57430 |
| Calculus of bile duct with acute cholecystitis and obstruction | 57431 |
| Calculus of gallbladder and bile duct with acute cholecystitis, with obstruction | 57461 |
| Calculus of gallbladder and bile duct with other cholecystitis, with obstruction | 57471 |
| Calculus of gallbladder and bile duct with acute and chronic cholecystitis, without mention of obstruction | 57480 |
| Calculus of gallbladder and bile duct with acute and chronic cholecystitis, with obstruction | 57481 |
| Cholecystitis, unspecified | 57510 |
| Chronic cholecystitis | 57511 |
| Acute and chronic cholecystitis | 57512 |
| Gross hematuria | 59971 |
| Peyronie's disease | 60785 |
| Mastodynia | 61171 |
| Pyogenic arthritis, lower leg | 71106 |
| Rheumatoid lung | 71481 |
| Pain in joint, shoulder region | 71941 |
| Necrotizing fasciitis | 72886 |
| Rhabdomyolysis | 72888 |
| Panniculitis of other sites | 72939 |
| Swelling of limb | 72981 |
| Acute osteomyelitis, site unspecified | 73000 |
| Acute osteomyelitis, lower leg | 73006 |
| Acute osteomyelitis, ankle and foot | 73007 |
| Acute osteomyelitis, other specified site | 73008 |
| Chronic osteomyelitis, pelvic region and thigh | 73015 |
| Chronic osteomyelitis, lower leg | 73016 |
| Chronic osteomyelitis, ankle and foot | 73017 |
| Chronic osteomyelitis, other specified sites | 73018 |
| Unspecified osteomyelitis, site unspecified | 73020 |
| Unspecified osteomyelitis, hand | 73024 |
| Unspecified osteomyelitis, pelvic region and thigh | 73025 |
| Unspecified osteomyelitis, other specified sites | 73028 |
| Pathologic fracture of humerus | 73311 |
| Pathologic fracture of neck of femur | 73314 |
| Pathologic fracture of other specified part of femur | 73315 |
| Pathologic fracture of other specified site | 73319 |
| Aseptic necrosis of bone, site unspecified | 73340 |
| Aseptic necrosis of head of humerus | 73341 |
| Aseptic necrosis of head and neck of femur | 73342 |
| Aseptic necrosis of other bone site | 73349 |
| Stress fracture of femoral neck | 73396 |
| Complete transposition of great vessels | 74510 |
| Transposition of great vessels, double outlet right ventricle | 74511 |
| Corrected transposition of great vessels | 74512 |
| Unspecified type congenital endocardial cushion defect | 74560 |
| Ostium primum defect | 74561 |
| Other congenital endocardial cushion defect | 74569 |
| Unspecified congenital pulmonary valve anomaly | 74600 |
| Congenital atresia of pulmonary valve | 74601 |
| Congenital stenosis of pulmonary valve | 74602 |
| Other congenital anomalies of pulmonary valve | 74609 |
| Congenital subaortic stenosis | 74681 |
| Congenital coronary artery anomaly | 74685 |
| Congenital heart block | 74686 |
| Congenital malposition of heart and cardiac apex | 74687 |
| Other specified congenital anomaly of heart | 74689 |
| Coarctation of aorta (preductal) (postductal) | 74710 |
| Unspecified congenital anomaly of aorta | 74720 |
| Congenital atresia and stenosis of aorta | 74722 |
| Other congenital anomaly of aorta | 74729 |
| Congenital anomaly of the peripheral vascular system, unspecified site | 74760 |
| Congenital anomaly of cerebrovascular system | 74781 |
| Marfan's syndrome | 75982 |
| Other specified multiple congenital anomalies, so described | 75989 |
| Coma | 78001 |
| Transient alteration of awareness | 78002 |
| Other alteration of consciousness | 78009 |
| Hypothermia not associated with low environmental temperature | 78065 |
| Memory loss | 78093 |
| Generalized pain | 78096 |
| Altered mental status | 78097 |
| Failure to thrive | 78341 |
| Jaw pain | 78492 |
| Unspecified shock | 78550 |
| Cardiogenic shock | 78551 |
| Septic shock | 78552 |
| Other shock without mention of trauma | 78559 |
| Unspecified respiratory abnormality | 78600 |
| Orthopnea | 78602 |
| Apnea | 78603 |
| Cheyne-Stokes respiration | 78604 |
| Shortness of breath | 78605 |
| Tachypnea | 78606 |
| Wheezing | 78607 |
| Other dyspnea and respiratory abnormalities | 78609 |
| Hemoptysis unspecified | 78630 |
| Other hemoptysis | 78639 |
| Precordial pain | 78651 |
| Painful respiration | 78652 |
| Chest pain, other | 78659 |
| Abdominal pain, unspecified site | 78900 |
| Abdominal pain, right upper quadrant | 78901 |
| Abdominal pain, left upper quadrant | 78902 |
| Abdominal pain, right lower quadrant | 78903 |
| Abdominal pain, left lower quadrant | 78904 |
| Abdominal pain, periumbilic | 78905 |
| Abdominal pain, epigastric | 78906 |
| Abdominal pain, generalized | 78907 |
| Abdominal pain, other specified site | 78909 |
| Malignant ascites | 78951 |
| Abdominal tenderness, unspecified site | 78960 |
| Abdominal tenderness, right upper quadrant | 78961 |
| Abdominal tenderness, right lower quadrant | 78963 |
| Abdominal tenderness, left lower quadrant | 78964 |
| Abdominal tenderness, epigastric | 78966 |
| Abdominal tenderness, generalized | 78967 |
| Abdominal tenderness, other specified site | 78969 |
| Other abnormal glucose | 79029 |
| Abnormal arterial blood gases | 79091 |
| Other nonspecific findings on examination of blood | 79099 |
| Abnormal findings lung field other | 79319 |
| Nonspecific abnormal electroencephalogram (EEG) | 79402 |
| Nonspecific abnormal unspecified cardiovascular function study | 79430 |
| Nonspecific abnormal electrocardiogram (ECG) (EKG) | 79431 |
| Other nonspecific abnormal cardiovascular system function study | 79439 |
| Hypoxemia | 79902 |
| Closed fracture of base of skull without mention of intracranial injury, unspecified state | 80100 |
| Closed fracture of base of skull without mention of intracranial injury, no loss of consciousness | 80101 |
| Closed fracture of base of skull without mention of intracranial injury, loss of consciousness | 80106 |
| Closed fracture of base of skull with subarachnoid, subdural, and extradural hemorrhage, unspecified state of consciousness | 80120 |
| Closed fracture of base of skull with subarachnoid, subdural, and extradural hemorrhage, with no loss of consciousness | 80121 |
| Closed fracture of base of skull with subarachnoid, subdural, and extradural hemorrhage, with brief [less than one hour] loss of consciousness) | 80122 |
| Closed fracture of base of skull with subarachnoid, subdural, and extradural hemorrhage, with loss of consciousness of unspecified duration | 80126 |
| Closed fracture of third cervical vertebra without mention of spinal cord injury | 80503 |
| Closed fracture of fourth cervical vertebra without mention of spinal cord injury | 80504 |
| Closed fracture of fifth cervical vertebra without mention of spinal cord injury | 80505 |
| Closed fracture of seventh cervical vertebra without mention of spinal cord injury | 80507 |
| Closed fracture of multiple cervical vertebrae without mention of spinal cord injury | 80508 |
| Closed fracture of C1-C4 level with unspecified spinal cord injury | 80600 |
| Closed fracture of C5-C7 level with unspecified spinal cord injury | 80605 |
| Closed fracture of T7-T12 level with unspecified spinal cord injury | 80625 |
| Closed fracture of rib(s), unspecified | 80700 |
| Closed fracture of one rib | 80701 |
| Closed fracture of two ribs | 80702 |
| Closed fracture of three ribs | 80703 |
| Closed fracture of four ribs | 80704 |
| Closed fracture of five ribs | 80705 |
| Closed fracture of six ribs | 80706 |
| Closed fracture of seven ribs | 80707 |
| Closed fracture of eight or more ribs | 80708 |
| Closed fracture of multiple ribs, unspecified | 80709 |
| Closed fracture of ilium | 80841 |
| Closed fracture of ischium | 80842 |
| Multiple closed pelvic fractures with disruption of pelvic circle | 80843 |
| Unspecified part of closed fracture of clavicle | 81000 |
| Closed fracture of shaft of clavicle | 81002 |
| Closed fracture of acromial end of clavicle | 81003 |
| Closed fracture of unspecified part of scapula | 81100 |
| Closed fracture of glenoid cavity and neck of scapula | 81103 |
| Closed fracture of unspecified part of upper end of humerus | 81200 |
| Closed fracture of surgical neck of humerus | 81201 |
| Closed fracture of anatomical neck of humerus | 81202 |
| Closed fracture of greater tuberosity of humerus | 81203 |
| Other closed fractures of upper end of humerus | 81209 |
| Closed fracture of unspecified part of humerus | 81220 |
| Closed fracture of shaft of humerus | 81221 |
| Closed fracture of unspecified part of lower end of humerus | 81240 |
| Closed fracture of supracondylar humerus | 81241 |
| Closed fracture of unspecified condyle(s) of humerus | 81244 |
| Other closed fracture of lower end of humerus | 81249 |
| Closed fracture of unspecified intracapsular section of neck of femur | 82000 |
| Closed fracture of epiphysis (separation) (upper) of neck of femur | 82001 |
| Closed fracture of midcervical section of femur | 82002 |
| Closed fracture of base of neck of femur | 82003 |
| Other closed transcervical fracture of femur | 82009 |
| Closed fracture of unspecified trochanteric section of femur | 82020 |
| Closed fracture of intertrochanteric section of femur | 82021 |
| Closed fracture of subtrochanteric section of femur | 82022 |
| Open fracture of intertrochanteric section of femur | 82031 |
| Closed fracture of unspecified part of femur | 82100 |
| Closed fracture of shaft of femur | 82101 |
| Closed fracture of unspecified part of lower end of femur | 82120 |
| Closed fracture of femoral condyle | 82121 |
| Closed supracondylar fracture of femur | 82123 |
| Other closed fracture of lower end of femur | 82129 |
| Open fracture of unspecified part of lower end of femur | 82130 |
| Open supracondylar fracture of femur | 82133 |
| Closed anterior dislocation of humerus | 83101 |
| Concussion, with loss of consciousness of 30 minutes or less | 85011 |
| Cerebellar or brain stem contusion without mention of open intracranial wound, no loss of consciousness | 85141 |
| Other and unspecified cerebral laceration and contusion, without mention of open intracranial wound, unspecified state of consciousness | 85180 |
| Other and unspecified cerebral laceration and contusion, without mention of open intracranial wound, with no loss of consciousness | 85181 |
| Subarachnoid hemorrhage following injury, without mention of open intracranial wound, unspecified state of consciousness | 85200 |
| Subarachnoid hemorrhage following injury, without mention of open intracranial wound, no loss of consciousness | 85201 |
| Subarachnoid hemorrhage following injury, without mention of open intracranial wound, brief loss of consciousness | 85202 |
| Subarachnoid hemorrhage following injury, without mention of open intracranial wound, loss of consciousness | 85206 |
| Subdural hemorrhage following injury, without mention of open intracranial wound, unspecified state of consciousness | 85220 |
| Subdural hemorrhage following injury, without mention of open intracranial wound, no loss of consciousness | 85221 |
| Subdural hemorrhage following injury, without mention of open intracranial wound, brief loss of consciousness | 85222 |
| Subdural hemorrhage following injury, without mention of open intracranial wound, without mention of open intracranial wound, with prolonged [more than 24 hours] loss of consciousness without return to pre-existing conscious level | 85225 |
| Subdural hemorrhage following injury, without mention of open intracranial wound, loss of consciousness | 85226 |
| Subdural hemorrhage following injury, without mention of open intracranial wound, unspecified state of consciousness | 85229 |
| Extradural hemorrhage following injury, without mention of open intracranial wound, unspecified state of consciousness | 85240 |
| Extradural hemorrhage following injury, without mention of open intracranial wound, no loss of consciousness | 85241 |
| Other and unspecified intracranial hemorrhage following injury, without mention of open intracranial wound, unspecified state of consciousness | 85300 |
| Other and unspecified intracranial hemorrhage following injury, without mention of open intracranial wound, with no loss of consciousness | 85301 |
| Other and unspecified intracranial hemorrhage following injury, without mention of open intracranial wound, with brief [less than one hour] loss of consciousness | 85302 |
| Other and unspecified intracranial hemorrhage following injury without mention of open intracranial wound, with prolonged [more than 24 hours] loss of consciousness without return to pre-existing conscious level | 85305 |
| Intracranial injury of other and unspecified nature, without mention of open intracranial wound, unspecified state of consciousness | 85400 |
| Intracranial injury of other and unspecified nature, without mention of open intracranial wound, with no loss of consciousness | 85401 |
| Intracranial injury of other and unspecified nature, without mention of open intracranial wound, with brief [less than one hour] loss of consciousness | 85402 |
| Intracranial injury of other and unspecified nature, without mention of open intracranial wound, with loss of consciousness of unspecified duration | 85406 |
| Unspecified injury to heart without mention of open wound into thorax | 86100 |
| Heart contusion without mention of open wound into thorax | 86101 |
| Lung contusion without mention of open wound into thorax | 86121 |
| Injury to other specified intrathoracic organs without mention of open wound into cavity | 86229 |
| Massive parenchymal disruption of spleen without mention of open wound into cavity | 86504 |
| Contusion of shoulder region | 92300 |
| C1-C4 level with central cord syndrome | 95203 |
| Other injury of chest wall | 95911 |
| Poisoning by opium (alkaloids), unspecified | 96500 |
| Poisoning by heroin | 96501 |
| Poisoning by methadone | 96502 |
| Poisoning by opiates and related narcotics, other | 96509 |
| Poisoning by propionic acid derivatives | 96561 |
| Poisoning antidepressants unspec | 96900 |
| Poisoning SSRI | 96903 |
| Poisoning tricyclic antidepress | 96905 |
| Poisoning antidepressants other | 96909 |
| Poisoning by amphetamines | 96972 |
| Poisoning by cocaine | 97081 |
| Toxic effect of tobacco | 98984 |
| Toxic effect of other substances | 98989 |
| Unspecified adverse effect of unspecified drug, medicinal and biological substance | 99520 |
| Unspecified adverse effect of insulin | 99523 |
| Unspecified adverse effect of other drug, medicinal and biological substance | 99529 |
| Sepsis | 99591 |
| Severe sepsis | 99592 |
| Mechanical complication of unspecified cardiac device, implant, and graft | 99600 |
| Mechanical complication due to cardiac pacemaker (electrode) | 99601 |
| Mechanical complication due to heart valve prosthesis | 99602 |
| Mechanical complication due to coronary bypass graft | 99603 |
| Mechanical complication due to automatic implantable cardiac defibrillator | 99604 |
| Mechanical complication of cardiac device, implant, and graft, other | 99609 |
| Mechanical complication due to other tissue graft, not elsewhere classified | 99652 |
| Mechanical complication due to other implant and internal device, not elsewhere classified | 99659 |
| Infection and inflammatory reaction due to unspecified device, implant, and graft | 99660 |
| Infection and inflammatory reaction due to cardiac device, implant, and graft | 99661 |
| Infection and inflammatory reaction due to other vascular device, implant, and graft | 99662 |
| Infection and inflammatory reaction due to peritoneal dialysis catheter | 99668 |
| Other complications due to heart valve prosthesis | 99671 |
| Other complications due to other cardiac device, implant, and graft | 99672 |
| Other complications due to renal dialysis device, implant, and graft | 99673 |
| Other complications due to other vascular device, implant, and graft | 99674 |
| Complications of transplanted kidney | 99681 |
| Complications of transplanted liver | 99682 |
| Complications of transplanted heart | 99683 |
| Complications of transplanted lung | 99684 |
| Central nervous system complication | 99701 |
| Iatrogenic cerebrovascular infarction or hemorrhage | 99702 |
| Other respiratory complications | 99739 |
| Infection (chronic) of amputation stump | 99762 |
| Other late amputation stump complication | 99769 |
| Vascular complications of other vessels | 99779 |
| Hemorrhage complicating a procedure | 99811 |
| Cataract fragments in eye following surgery | 99882 |
| Complications of medical care, NEC, infection due to central venous catheter | 99931 |
| Bloodstream infection central line | 99932 |
| Fall from other slipping, tripping, or stumbling | E8859 |
| Unspecified fall | E8889 |
| Antineoplastic and immunosuppressive drugs causing adverse effect in therapeutic use | E9331 |
| Cardiac rhythm regulators causing adverse effect in therapeutic use | E9420 |
| Asymptomatic human immunodeficiency virus (HIV) infection status | V08 |
| Personal history of malignant neoplasm of large intestine | V1005 |
| Personal history of malignant neoplasm of rectum, rectosigmoid junction, and anus | V1006 |
| Personal history of malignant neoplasm of bronchus and lung | V1011 |
| Personal history of malignant neoplasm of breast | V103 |
| Personal history of malignant neoplasm of ovary | V1043 |
| Personal history of malignant neoplasm of prostate | V1046 |
| Personal history of malignant neoplasm of bladder | V1051 |
| Personal history of sudden cardiac arrest | V1253 |
| Personal history of transient ischemic attack [TIA], and cerebral infarction without resid | V1254 |
| Personal history of other diseases of circulatory system | V1259 |
| Personal history of surgery to heart and great vessels, presenting hazards to health | V151 |
| Personal history of fall | V1588 |
| Other mental problems | V402 |
| Kidney replaced by transplant | V420 |
| Heart replaced by transplant | V421 |
| Heart valve replaced by transplant | V422 |
| Lung replaced by transplant | V426 |
| Liver replaced by transplant | V427 |
| Bone marrow replaced by transplant | V4281 |
| Organ or tissue replaced by other means, Heart assist device | V4321 |
| Heart valve replaced by other means | V433 |
| Blood vessel replaced by other means | V434 |
| Unspecified cardiac device in situ | V4500 |
| Cardiac pacemaker in situ | V4501 |
| Automatic implantable cardiac defibrillator in situ | V4502 |
| Other specified cardiac device in situ | V4509 |
| Renal dialysis status | V451 |
| Renal dialysis status | V4511 |
| Postprocedural aortocoronary bypass status | V4581 |
| Postprocedural percutaneous transluminal coronary angioplasty status | V4582 |
| Other cardiorespiratory problems | V472 |
| Fitting and adjustment of cardiac pacemaker | V5331 |
| Fitting and adjustment of automatic implantable cardiac defibrillator | V5332 |
| Fitting and adjustment of other cardiac device | V5339 |
| Attention to tracheostomy | V550 |
| Encounter for extracorporeal dialysis | V560 |
| Fitting and adjustment of extracorporeal dialysis catheter | V561 |
| Fitting and adjustment of peritoneal dialysis catheter | V562 |
| Radiotherapy | V580 |
| Encounter for antineoplastic chemotherapy | V5811 |
| Encounter for antineoplastic immunotherapy | V5812 |
| Aftercare following surgery for neoplasm | V5842 |
| Aftercare following organ transplant | V5844 |
| Encounter for long-term (current) use of other medications | V5869 |
| Fitting and adjustment of vascular catheter | V5881 |
| Encounter for therapeutic drug monitoring | V5883 |
| Kidney donor | V594 |
| Suicidal ideation | V6284 |
| Chemotherapy follow-up examination | V672 |
| Follow-up examination following completed treatment with high-risk medications, not elsewhere classifed | V6751 |
| Issue of repeat prescriptions | V681 |
| Other and unspecified general psychiatric examination | V702 |
| Examination of participant in clinical trial | V707 |
| Observation of other suspected mental condition | V7109 |
| Observation for suspected malignant neoplasm | V711 |
| Observation for suspected cardiovascular disease | V717 |

# Don’t screen women older than 65 years of age for cervical cancer who have had adequate prior screening and are not otherwise at high risk for cervical cancer

*Choosing Wisely Guidelines*

| **American Academy of Family Physicians** | Don’t screen women older than 65 years of age for cervical cancer who have had adequate prior screening and are not otherwise at high risk for cervical cancer. There is adequate evidence that screening women older than 65 years of age for cervical cancer who have had adequate prior screening and are not otherwise at high risk provides little to no benefit. |
| --- | --- |

*Methods*

We calculated the percent of female Medicare beneficiaries over age 65 at low risk for cervical cancer who received at least one cervical cancer screening test for each calendar year 2006-11. We then created a weighted average of imaging prevalence for the interval 2006-11. We required enrollment in fee-for-service Medicare Parts A and B for at least 11 months in each calendar year. Beneficiaries were deemed to be at high risk for cervical cancer if they had two physician or one acute hospital claim for relevant diagnoses at any point during the study period, with the exception of claims indicating an abnormal pap test or HPV, where we only required one claim.

*References*

NQF-Endorsed National Voluntary Consensus Standards for Physician-Focused Ambulatory Care. National Committee for Quality Assurance. 2008.

*CCS and ICD-9 Codes for Excluding Patients at High Risk for Cervical Cancer*

| **Label** | **Code** |
| --- | --- |
| Gynecological cancers | CCS 25-28 |
| HIV / AIDS | CCS 5 |
| Diethylstilbestrol exposure | ICD-9 760.76 |
| Abnormal Pap Test / HPV | ICD-9 795.0x, 795.1x, V72.32 |

*CPT Codes for Identifying Cervical Cancer Tests*

| **Label** | **Code** |
| --- | --- |
| Cytopathology cervical/vaginal req interp physician | 88141 |
| Cytopathology cerv/vag auto thin layer prep mnl screen | 88142 |
| Cytopathology c/v flu auto thin mnl scr&rescr phys | 88143 |
| Cytopathology smrs c/v scr automated system phys supv | 88147 |
| Cytopathology smrs c/v scr auto sys mnl rescr phys | 88148 |
| Cytopathology slides c/v mnl scr under phys | 88150 |
| Cytopathology slides c/v mnl scr&cptr rescr phys | 88152 |
| Cytopathology slides c/v mnl scr&rescr phys | 88153 |
| Cytopathology slides c/v mnl scr&cptr-rescr cell s&i | 88154 |
| Cytopathology slides c/v definitive hormonal eval | 88155 |
| Cytopathology slides c/v mnl scr&rescr phys supv | 88164 |
| Cytopathology slides c/v mnl scr&cptr rescr phys supv | 88165 |
| Cytopathology fine ndl aspirate immt cytohist std dx 1st | 88166 |
| Cytopathology eval fine needle aspirate interp & report | 88167 |
| Cytopathology c/v auto thin lyr prepj scr sys phys | 88174 |
| Cytopathology c/v auto thin lyr prepj scr mnl rescr phys | 88175 |

# Don’t routinely repeat dual-energy x-ray absorptiometry (DXA) scans more often than once every two years

*Choosing Wisely Guidelines*

| **American College of Rheumatology** | Don’t routinely repeat DXA scans more often than once every two years. Initial screening for osteoporosis should be performed according to National Osteoporosis Foundation recommendations. The optimal interval for repeating Dual-energy X-ray Absorptiometry (DXA) scans is uncertain, but because changes in bone density over short intervals are often smaller than the measurement error of most DXA scanners, frequent testing (e.g., <2 years) is unnecessary in most patients. Even in high-risk patients receiving drug therapy for osteoporosis, DXA changes do not always correlate with probability of fracture. Therefore, DXAs should only be repeated if the result will influence clinical management or if rapid changes in bone density are expected. Recent evidence also suggests that healthy women age 67 and older with normal bone mass may not need additional DXA testing for up to ten years provided osteoporosis risk factors do not significantly change. |
| --- | --- |

*Methods*

We calculated the proportion of DXA tests performed on female Medicare beneficiaries over age 66 that were within 23 months of a previous DXA test (i.e., delivered at short interval) in each calendar year 2008-11. We then created a weighted average of testing prevalence for the interval 2008-11. We required beneficiaries to be enrolled in fee-for-service Medicare Parts A and B in the 23 months prior to each DXA test identified. We excluded beneficiaries who were (i) diagnosed with any cancer, except non-melanoma skin cancer (using the Clinical Classifications Software codes 11-22 and 24-44) and (ii) diagnosed with fragility fracture in the 23 months prior to the DXA. Fragility fractures were defined as follows: (i) at least one CPT code for hip fracture repair; (ii) at least one diagnosis code for distal radius or proximal humerus fracture, plus at least one upper extremity radiography claim within seven days (plus or minus) of the diagnosis claim date; or (iii) at least one ICD-9 diagnosis code for vertebral fracture.

*CPT Codes for Identifying DXA Tests*

| **Label** | **Code** |
| --- | --- |
| Dual energy x-ray absorptiometry body composition study, one or more sites | 0028T |
| Bone density study | 76075 |
| Bone density appendicular | 76076 |
| Bone density study | 77080 |
| Bone density appendicular | 77081 |

*ICD-9 and CPT Codes for Identifying Fragility Fractures.*

| **Label** | **Code** |
| --- | --- |
| Hip fracture | CPT 27230-27248 |
| Wrist fracture | ICD-9 813.4-813.54, 814.00, 814.10 and CPT 25600, 25605, 25609, 25611 |
| Humerus fracture | ICD-9 812.0-812.19 and CPT 23600-23630, 23665-23680 |
| Vertebral fracture | ICD-9 805.2. 805.4, 805.8, 733.13 |
| Shoulder/clavicle imaging | CPT 73000, 73010, 73020, 73030, 73040, 73050 |
| Humerus/elbow imaging | CPT 73060, 73070, 73080, 73085 |
| Forearm/wrist imaging | CPT 73090, 73092, 73100, 73110, 73115 |
| Hand imaging | CPT 73120, 73130, 73140 |
| CT | CPT 73200, 73201, 73202, 73206 |
| MRI | CPT 73218, 73219, 73220, 73221, 73222, 73223, 73225 |

# Don't perform preoperative cardiac tests for cataract surgeries

*Choosing Wisely Guidelines*

| **American Academy of Ophthalmology** | Don’t perform preoperative medical tests for eye surgery unless there are specific medical indications. For many, preoperative tests are not necessary because eye surgeries are not lengthy and don’t pose serious risks. An EKG should be ordered if patients have heart disease. A blood glucose test should be ordered if patients have diabetes. A potassium test should be ordered if patients are on diuretics. In general, patients scheduled for surgery do not need medical tests unless the history or physical examination indicate the need for a test, e.g., the existence of conditions noted above. Institutional policies should consider these issues. |
| --- | --- |
| **American College of Cardiology** | Don’t perform stress cardiac imaging or advanced non-invasive imaging as a pre-operative assessment in patients scheduled to undergo low-risk non-cardiac surgery. Non-invasive testing is not useful for patients undergoing low-risk non-cardiac surgery (e.g., cataract removal). These types of tests do not change the patient’s clinical management or outcomes and will result in increased costs. |
| **Society of General Internal Medicine** | Don’t perform routine pre-operative testing before low-risk surgical procedures. Pre-operative assessment is expected before all surgical procedures. This assessment includes an appropriately directed and sufficiently comprehensive history and physical examination, and, in some cases, properly includes laboratory and other testing to help direct management and assess surgical risk. However, pre-operative testing for low-risk surgical procedures (such as cataract extraction) results in unnecessary delays and adds to significant avoidable costs and should be eliminated. |

*Methods*

We calculated the percent of Medicare beneficiaries over age 65 who received a non-indicated electrocardiogram, cardiovascular stress test (including stress imaging), echocardiogram, chest x-ray, or advanced cardiac imaging (CT, MRI, PET) in the 30 days before cataract surgery in each calendar year 2006-11. We then created a weighted average of testing prevalence for the interval 2006-11. We identified cataract surgery using the BETOS code P4B. We required enrollment in fee-for-service Medicare Parts A and B for at least 11 months during the calendar year. We did not count testing events if diagnosis codes in any of the first four fields on a claim involved cardiac disease, cardiac-related symptoms, or any conditions that might justify the test (e.g., respiratory conditions, cancer), and we excluded beneficiaries who were admitted in the 30 days before the surgery.

*References*

Physician Quality Reporting System (PQRS) Measure Specifications Manual for Claims and Registry Reporting of Individual Measures. Centers for Medicare and Medicaid Services. 2014.

*CPT Codes for Identifying Cardiac Tests (Advanced Imaging, Cardiac Stress Tests, Echocardiograms, and Electrocardiograms)*

See codes applied to [cardiac testing measure](#_Don't_order_cardiac_1) (pp. 7).

*CPT Codes for Identifying Chest X-Rays*

| **Label** | **Code** |
| --- | --- |
| Chest x-ray 1 view frontal | 71010 |
| Chest x-ray stereo frontal | 71015 |
| Chest x-ray 2vw frontal&latl | 71020 |
| Chest x-ray frnt lat lordotc | 71021 |
| Chest x-ray frnt lat oblique | 71022 |
| Chest x-ray 4/> views | 71030 |
| Chest x-ray special views | 71035 |

*ICD-9 Codes for Excluding Advanced Imaging (CT, MRI, PET)*

Advanced imaging tests were excluded from the analysis if the associated primary, secondary, tertiary, or quaternary diagnosis involved: (i) cardiac conditions; (ii) respiratory conditions, except acute respiratory infections (e.g. pneumonia); (iii) acute central nervous system conditions, except headaches; (iv) all thoracic and non-thoracic arterial conditions, but not peripheral venous conditions such as deep venous thrombosis; (v) malignant hypertension; (vi) end stage renal disease and acute renal disease; (vii) abdominal pain; (viii) cancer; (ix) drug toxicity or poisoning; or (x) exertional stress and fatigue.

| **Label** | **Code** |
| --- | --- |
| Pulmonary diseases other mycobact | 0310 |
| Streptococcal septicemia | 0380 |
| Meth susc staph aureus septicemia | 03811 |
| Escherichia coli septicemia | 03842 |
| Mssa infection | 04111 |
| Mrsa infection | 04112 |
| Human immunodeficiency virus dis | 042 |
| Unspecified viral infection | 07999 |
| Lyme disease | 08881 |
| Sarcoidosis | 135 |
| Malignant neoplasm of upper lobe, bronchus, or lung | 1623 |
| Malignant neoplasm of bronchus and lung, unspecified site | 1629 |
| Oth malig neo ear skin external | 1732 |
| Malig neo skin oth uns parts face | 1733 |
| Oth malignant neo scalp/skin neck | 1734 |
| Oth malig neo skin l limb inc hip | 1737 |
| Oth malignant neo skin site uns | 1739 |
| Malignant neoplasm of breast (female), unspecified site | 1749 |
| Malignant neoplasm of prostate | 185 |
| Malignant neo thyroid gland | 193 |
| Benign neoplasm bronchus/lung | 2123 |
| Benign neoplasm cerebral meninges | 2252 |
| Ca in situ breast | 2330 |
| Ca in situ prostate | 2334 |
| Uncert behavior neo intestine | 2352 |
| Uncert behavior neo lung | 2357 |
| Uncert behavior neo prostate | 2365 |
| Uncert behavior neo bladder | 2367 |
| Uncert behavior neo kidney | 23691 |
| Uncert behavior neo skin | 2382 |
| Uncert behavior neo breast | 2383 |
| Polycythemia vera | 2384 |
| Essential thrombocythemia | 23871 |
| Lo gr myelodysplastic synd lesions | 23872 |
| Respiratory unsp behavior neo | 2391 |
| Bone/skin unsp behavior neo | 2392 |
| Bladder unsp behavior neo | 2394 |
| Ot gu unsp behavior neo | 2395 |
| Brain unsp behavior neo | 2396 |
| Endonerv unsp behavior neo | 2397 |
| Unsp behavior neo | 2399 |
| Acute thyroiditis | 2450 |
| Diabetes hypersmolarity type ii | 25020 |
| Glucocorticoid deficiency | 25541 |
| Uns protein calorie malnutrition | 2639 |
| Disturb sulphur amino acid metabol | 2704 |
| Monoclonal paraproteinemia | 2731 |
| Disorders of iron metabolism | 2750 |
| Disorders magnesium metabolism | 2752 |
| Disorders phosphorus metabolism | 2753 |
| Uns disorder calcium metabolism | 27540 |
| Hypocalcemia | 27541 |
| Hypercalcemia | 27542 |
| Oth disorders calcium metabolism | 27549 |
| Hyperosmolality/or hypernatremia | 2760 |
| Hyposmolality/or hyponatremia | 2761 |
| Acidosis | 2762 |
| Volume depletion unspecified | 27650 |
| Dehydration | 27651 |
| Fluid overload | 2766 |
| Hyperpotassemia | 2767 |
| Hypopotassemia | 2768 |
| Electrolyte/fluid disorders oth | 2769 |
| Autoimmune disease other | 2794 |
| Iron deficiency anemia blood loss | 2800 |
| Iron def anemia inadeq iron intake | 2801 |
| Other iron deficiency anemias | 2808 |
| Uns iron deficiency anemia | 2809 |
| Pernicious anemia | 2810 |
| Oth vitamin b12 deficiency anemia | 2811 |
| Folate deficiency anemia | 2812 |
| Other megaloblastic anemias oth | 2813 |
| Anemia w ot nutritional deficiency | 2818 |
| Uns deficiency anemia | 2819 |
| Uns acquired hemolytic anemia | 2839 |
| Pancytopenia | 2841 |
| Other aplastic anemias | 2848 |
| Sideroblastic anemia | 2850 |
| Anemia chronic kidney disease | 28521 |
| Anemia of other chronic disease | 28529 |
| Other specified anemias | 2858 |
| Anemia unspecified | 2859 |
| Defibrination syndrome | 2866 |
| Oth nonthrombocytopenic purpuras | 2872 |
| Primary thrombocytopenia unspec | 28730 |
| Immune thrombocytopenic purpura | 28731 |
| Uns thrombocytopenia | 2875 |
| Neutropenia unspecified | 28800 |
| Functional disord neutrophils | 2881 |
| Leukocytopenia unspecified | 28850 |
| Leukocytosis unspecified | 28860 |
| Other disease white blood cells | 2888 |
| Polycythemia secondary | 2890 |
| Ot dis blood/blood forming organs | 28989 |
| Uns dis blood/blood forming organs | 2899 |
| Delirium in other conditions | 2930 |
| Uns schizophrenia | 29590 |
| Depressive type psychosis | 29620 |
| Maj depress dis recurr epi uns | 29630 |
| Maj depress dis recur epi sev | 29633 |
| Bipolar i disorder unspecified | 2967 |
| Bipolar disorder unspecified | 29680 |
| Unspecified psychosis | 2989 |
| Anxiety state unspecified | 30000 |
| Panic disorder wo agoraphobia | 30001 |
| Generalized anxiety disorder | 30002 |
| Dysthymic disorder | 3004 |
| Psychosex dysfunc inhibited excite | 30272 |
| Oth/uns alcohol dependence uns | 30390 |
| Opioid type dependence uns | 30400 |
| Opioid type dependence continuous | 30401 |
| Unspec drug dependence uns | 30490 |
| Alcohol abuse unspec | 30500 |
| Oth mixed/uns drug abuse uns | 30590 |
| Adjustment disorder mixed | 30928 |
| Personality chg due to oth cond | 3101 |
| Depressive disorder other | 311 |
| Obstructive hydrocephalus | 3314 |
| Other acute postoperative pain | 33818 |
| Multiple sclerosis | 340 |
| Encephalopathy unspecified | 34830 |
| Metabolic encephalopathy | 34831 |
| Other visual disturbances | 3688 |
| Uns peripheral vertigo | 38610 |
| Benign paroxysmal position vertigo | 38611 |
| Unspecified septicemia | 389 |
| Mitral stenosis | 3940 |
| Rheumatic mitral insufficiency | 3941 |
| Mitral stenosis with insufficiency | 3942 |
| Other and unspecified mitral valve diseases | 3949 |
| Rheumatic aortic stenosis | 3950 |
| Rheumatic aortic insufficiency | 3951 |
| Rheumatic aortic stenosis with insufficiency | 3952 |
| Other and unspecified rheumatic aortic diseases | 3959 |
| Mitral valve stenosis and aortic valve stenosis | 3960 |
| Mitral valve stenosis and aortic valve insufficiency | 3961 |
| Mitral valve insufficiency and aortic valve stenosis | 3962 |
| Mitral valve insufficiency and aortic valve insufficiency | 3963 |
| Multiple involvement of mitral and aortic valves | 3968 |
| Unspecified mitral and aortic valve diseases | 3969 |
| Diseases of tricuspid valve | 3970 |
| Rheumatic heart failure (congestive) | 39891 |
| Essential hypertension, malignant | 4010 |
| Malignant hypertensive heart disease without heart failure | 40200 |
| Malignant hypertensive heart disease with heart failure | 40201 |
| Benign hypertensive heart disease without heart failure | 40210 |
| Benign hypertensive heart disease with heart failure | 40211 |
| Unspecified hypertensive heart disease without heart failure | 40290 |
| Hypertensive heart disease, unspecified, with heart failure | 40291 |
| Mal kid hyper w ckd stage i-iv | 40300 |
| Hypertensive heart and chronic kidney disease, malignant, without heart failure and with chronic kidney disease stage I-IV | 40400 |
| Hypertensive heart and chronic kidney disease, malignant, with heart failure and with chronic kidney disease stage I-IV | 40401 |
| Hypertensive heart and chronic kidney disease, benign, without heart failure and with chronic kidney disease stage I-IV | 40410 |
| Hypertensive heart and chronic kidney disease, benign, without heart failure and with chronic kidney disease stage V | 40412 |
| Hypertensive heart and chronic kidney disease, benign, with heart failure and with chronic kidney disease stage V | 40413 |
| Hypertensive heart and chronic kidney disease, unspecified, without heart failure and with chronic kidney disease stage I-IV | 40490 |
| Hypertensive heart and chronic kidney disease, unspecified, with heart failure and with chronic kidney disease stage I-IV | 40491 |
| Hypertensive heart and chronic kidney disease, unspecified, without heart failure and with chronic kidney disease stage V | 40492 |
| Hypertensive heart and chronic kidney disease, unspecified, with heart failure and with chronic kidney disease stage V | 40493 |
| Acute myocardial infarction of anterolateral wall, episode of care unspecified | 41000 |
| Acute myocardial infarction of anterolateral wall, initial episode of care | 41001 |
| Acute myocardial infarction of anterolateral wall, subsequent episode of care | 41002 |
| Acute myocardial infarction of other anterior wall, episode of care unspecified | 41010 |
| Acute myocardial infarction of other anterior wall, initial episode of care | 41011 |
| Acute myocardial infarction of other anterior wall, subsequent episode of care | 41012 |
| Acute myocardial infarction of inferolateral wall, episode of care unspecified | 41020 |
| Acute myocardial infarction of inferolateral wall, initial episode of care | 41021 |
| Acute myocardial infarction of inferolateral wall, subsequent episode of care | 41022 |
| Acute myocardial infarction of inferoposterior wall, episode of care unspecified | 41030 |
| Acute myocardial infarction of inferoposterior wall, initial episode of care | 41031 |
| Acute myocardial infarction of inferoposterior wall, subsequent episode of care | 41032 |
| Acute myocardial infarction of other inferior wall, episode of care unspecified | 41040 |
| Acute myocardial infarction of other inferior wall, initial episode of care | 41041 |
| Acute myocardial infarction of other inferior wall, subsequent episode of care | 41042 |
| Acute myocardial infarction of other lateral wall, episode of care unspecified | 41050 |
| Acute myocardial infarction of other lateral wall, initial episode of care | 41051 |
| Acute myocardial infarction of other lateral wall, subsequent episode of care | 41052 |
| Acute myocardial infarction, subendocardial infarction, episode of care unspecified | 41070 |
| Acute myocardial infarction, subendocardial infarction, initial episode of care | 41071 |
| Acute myocardial infarction, subendocardial infarction, subsequent episode of care | 41072 |
| Acute myocardial infarction of other specified sites, episode of care unspecified | 41080 |
| Acute myocardial infarction of other specified sites, initial episode of care | 41081 |
| Acute myocardial infarction of other specified sites, subsequent episode of care | 41082 |
| Acute myocardial infarction, unspecified site, episode of care unspecified | 41090 |
| Acute myocardial infarction, unspecified site, initial episode of care | 41091 |
| Acute myocardial infarction, unspecified site, subsequent episode of care | 41092 |
| Postmyocardial infarction syndrome | 4110 |
| Intermediate coronary syndrome | 4111 |
| Acute coronary occlusion without myocardial infarction | 41181 |
| Other acute and subacute form of ischemic heart disease | 41189 |
| Old myocardial infarction | 412 |
| Angina decubitus | 4130 |
| Prinzmetal angina | 4131 |
| Other and unspecified angina pectoris | 4139 |
| Coronary atherosclerosis of unspecified type of vessel, native or graft | 41400 |
| Coronary atherosclerosis of native coronary artery | 41401 |
| Coronary atherosclerosis of autologous vein bypass graft | 41402 |
| Coronary atherosclerosis of nonautologous biological bypass graft | 41403 |
| Coronary atherosclerosis of artery bypass graft | 41404 |
| Coronary atherosclerosis of unspecified type of bypass graft | 41405 |
| Coronary atherosclerosis, of native coronary artery of transplanted heart | 41406 |
| Coronary atherosclerosis, of bypass graft (artery) (vein) of transplanted heart | 41407 |
| Aneurysm of heart | 41410 |
| Aneurysm of coronary vessels | 41411 |
| Other aneurysm of heart | 41419 |
| Chronic total occlusion of coronary artery | 4142 |
| Coronary atherosclerosis due to lipid rich plaque | 4143 |
| Other specified forms of chronic ischemic heart disease | 4148 |
| Unspecified chronic ischemic heart disease | 4149 |
| Iatrogenic pulmonary embolism and infarction | 41511 |
| Other pulmonary embolism and infarction | 41519 |
| Primary pulmonary hypertension | 4160 |
| Other chronic pulmonary heart diseases | 4168 |
| Unspecified chronic pulmonary heart disease | 4169 |
| Unspecified acute pericarditis | 42090 |
| Acute idiopathic pericarditis | 42091 |
| Acute and subacute bacterial endocarditis | 4210 |
| Other specified diseases of pericardium | 4238 |
| Unspecified disease of pericardium | 4239 |
| Mitral valve disorders | 4240 |
| Aortic valve disorders | 4241 |
| Tricuspid valve disorders, specified as nonrheumatic | 4242 |
| Pulmonary valve disorders | 4243 |
| Endocarditis, valve unspecified, unspecified cause | 42490 |
| Endomyocardial fibrosis | 4250 |
| Hypertrophic obstructive cardiomyopathy | 4251 |
| Other primary cardiomyopathies | 4254 |
| Alcoholic cardiomyopathy | 4255 |
| Cardiomyopathy in other diseases classified elsewhere | 4258 |
| Unspecified secondary cardiomyopathy | 4259 |
| Atrioventricular block, complete | 4260 |
| Unspecified atrioventricular block | 42610 |
| First degree atrioventricular block | 42611 |
| Mobitz (type) II atrioventricular block | 42612 |
| Other second degree atrioventricular block | 42613 |
| Left bundle branch hemiblock | 4262 |
| Other left bundle branch block | 4263 |
| Right bundle branch block | 4264 |
| Unspecified bundle branch block | 42650 |
| Right bundle branch block and left posterior fascicular block | 42651 |
| Right bundle branch block and left anterior fascicular block | 42652 |
| Other bilateral bundle branch block | 42653 |
| Other heart block | 4266 |
| Anomalous atrioventricular excitation | 4267 |
| Long QT syndrome | 42682 |
| Other specified conduction disorder | 42689 |
| Unspecified conduction disorder | 4269 |
| Paroxysmal supraventricular tachycardia | 4270 |
| Paroxysmal ventricular tachycardia | 4271 |
| Unspecified paroxysmal tachycardia | 4272 |
| Atrial fibrillation | 42731 |
| Atrial flutter | 42732 |
| Ventricular fibrillation | 42741 |
| Ventricular flutter | 42742 |
| Cardiac arrest | 4275 |
| Unspecified premature beats | 42760 |
| Supraventricular premature beats | 42761 |
| Other premature beats | 42769 |
| Sinoatrial node dysfunction | 42781 |
| Other specified cardiac dysrhythmias | 42789 |
| Unspecified cardiac dysrhythmia | 4279 |
| Congestive heart failure, unspecified | 4280 |
| Left heart failure | 4281 |
| Unspecified systolic heart failure | 42820 |
| Acute systolic heart failure | 42821 |
| Chronic systolic heart failure | 42822 |
| Acute on chronic systolic heart failure | 42823 |
| Unspecified diastolic heart failure | 42830 |
| Acute diastolic heart failure | 42831 |
| Chronic diastolic heart failure | 42832 |
| Acute on chronic diastolic heart failure | 42833 |
| Unspecified combined systolic and diastolic heart failure | 42840 |
| Acute combined systolic and diastolic heart failure | 42841 |
| Chronic combined systolic and diastolic heart failure | 42842 |
| Acute on chronic combined systolic and diastolic heart failure | 42843 |
| Unspecified heart failure | 4289 |
| Unspecified myocarditis | 4290 |
| Myocardial degeneration | 4291 |
| Unspecified cardiovascular disease | 4292 |
| Cardiomegaly | 4293 |
| Functional disturbances following cardiac surgery | 4294 |
| Acquired cardiac septal defect | 42971 |
| Other disorders of papillary muscle | 42981 |
| Hyperkinetic heart disease | 42982 |
| Other ill-defined heart disease | 42989 |
| Unspecified heart disease | 4299 |
| Subarachnoid hemorrhage | 430 |
| Intracerebral hemorrhage | 431 |
| Subdural hemorrhage | 4321 |
| Occlusion and stenosis of carotid artery without mention of cerebral infarction | 43310 |
| Occlusion and stenosis of carotid artery with cerebral infarction | 43311 |
| Occlusion vertebral artery wo infar | 43320 |
| Occlusion and stenosis of multiple and bilateral precerebral arteries without mention of c | 43330 |
| Cerebral embolism with cerebral infarction | 43411 |
| Unspecified cerebral artery occlusion without mention of cerebral infarction | 43490 |
| Unspecified cerebral artery occlusion with cerebral infarction | 43491 |
| Vertebral artery syndrome | 4351 |
| Other specified transient cerebral ischemias | 4358 |
| Unspecified transient cerebral ischemia | 4359 |
| Acute, but ill-defined, cerebrovascular disease | 436 |
| Cerebral atherosclerosis | 4370 |
| Cerebral aneurysm nonruptured | 4373 |
| Uns cerebrovascular disease | 4379 |
| Vertigo | 43885 |
| Uns late effects cv disease | 4389 |
| Atherosclerosis of aorta | 4400 |
| Atherosclerosis of renal artery | 4401 |
| Atherosclerosis of native arteries of the extremities, unspecified | 44020 |
| Atherosclerosis of native arteries of the extremities with intermittent claudication | 44021 |
| Atherosclerosis of native arteries of the extremities with rest pain | 44022 |
| Atherosclerosis of native arteries of the extremities with ulceration | 44023 |
| Atherosclerosis of native arteries of the extremities with gangrene | 44024 |
| Atherosclerosis of other specified arteries | 4408 |
| Generalized and unspecified atherosclerosis | 4409 |
| Dissecting aortic aneurysm (any part), unspecified site | 44100 |
| Dissecting aortic aneurysm (any part), thoracic | 44101 |
| Dissecting aortic aneurysm (any part), abdominal | 44102 |
| Thoracic aneurysm without mention of rupture | 4412 |
| Abdominal aneurysm without mention of rupture | 4414 |
| Thoracoabdominal aneurysm without mention of rupture | 4417 |
| Aortic aneurysm of unspecified site without mention of rupture | 4419 |
| Raynaud's syndrome | 4430 |
| Other peripheral vascular disease | 44389 |
| Embolism and thrombosis of arteries of lower extremity | 44422 |
| Wegener's granulomatosis | 4464 |
| Giant cell arteritis | 4465 |
| Stricture of artery | 4471 |
| Other specified disorders of arteries and arterioles | 4478 |
| Unspecified disorders of arteries and arterioles | 4479 |
| Embolism/thrombosis inf vena cava | 4532 |
| Embolism/thrombosis uns site | 4539 |
| Orthostatic hypotension | 4580 |
| Other iatrogenic hypotension | 45829 |
| Unspecified hypotension | 4589 |
| Hemorrhage unspecified | 4590 |
| Acute upper resp infect oth sites | 4658 |
| Acute bronchitis | 4660 |
| Pneumonia adenovirus | 4800 |
| Pneumonia respiratory syncy virus | 4801 |
| Uns viral pneumonia | 4809 |
| Pneumococcal pneumonia | 481 |
| Pneumonia other bacteria | 48289 |
| Uns bacterial pneumonia | 4829 |
| Bronchopneumonia organism unspec | 485 |
| Pneumonia organism unspecified | 486 |
| Influenza with pneumonia | 4870 |
| Influenza w oth respiratory manif | 4871 |
| Obstructive chronic bronchitis, without exacerbation | 49120 |
| Obstructive chronic bronchitis, with (acute) exacerbation | 49121 |
| Obst chr bronchitis w ac bronchitis | 49122 |
| Other emphysema | 4928 |
| Extrinsic asthma unspecified | 49300 |
| Ex asthma w exacerbation | 49302 |
| Chronic obstructive asthma, unspecified | 49320 |
| Chronic obst asthma w status asthm | 49321 |
| Chronic obstructive asthma, with (acute) exacerbation | 49322 |
| Asthma, unspecified, unspecified status | 49390 |
| Uns asthma w status asthmaticus | 49391 |
| Asthma, unspecified, with (acute) exacerbation | 49392 |
| Bronchiectasis w acute exacerb | 4941 |
| Chronic airway obstruction, not elsewhere classified | 496 |
| Pneumonitis inhalation food | 5070 |
| Pleurisy without mention of effusion or current tuberculosis | 5110 |
| Other effusion not tuberculous | 5118 |
| Unspecified pleural effusion | 5119 |
| Pulmonary congestion and hypostasis | 514 |
| Postinflammatory pulmonary fibrosis | 515 |
| Other alveolar pneumonopathy | 5168 |
| Uns alveolar pneumonopathy | 5169 |
| Pulmonary collapse | 5180 |
| Unspecified acute edema of lung | 5184 |
| Pulmonary insuffic trauma surgery | 5185 |
| Acute respiratory failure | 51881 |
| Other pulmonary insufficiency, not elsewhere classified | 51882 |
| Acute and chronic respiratory failure | 51884 |
| Other diseases of lung, not elsewhere classified | 51889 |
| Acute bronchospasm | 51911 |
| Oth diseases trachea/bronchus | 51919 |
| Disorders diaphragm | 5194 |
| Oth diseases respiratory system | 5198 |
| Uns disease respiratory system | 5199 |
| Unspecified disease of the jaws | 5269 |
| Uns esophagitis | 53010 |
| Reflux esophagitis | 53011 |
| Oth esophagitis | 53019 |
| Acute gastritis wohemorrhage | 53500 |
| Uns ulcerative colitis | 5569 |
| Acute cholecystitis | 5750 |
| Acute pancreatitis | 5770 |
| Hematemesis | 5780 |
| Celiac disease | 5790 |
| Unspecified acute renal failure | 5849 |
| End stage renal disease | 5856 |
| Diffuse cystic mastopathy | 6101 |
| Mastodynia | 61171 |
| Lump or mass in breast | 61172 |
| Oth signs/symptoms in breast | 61179 |
| Postmenopausal bleeding | 6271 |
| Lupus erythematosus | 6954 |
| Psoriatic arthropathy | 6960 |
| Oth psoriasis | 6961 |
| Systemic sclerosis | 7101 |
| Sicca syndrome | 7102 |
| Uns diffuse connect tissue disease | 7109 |
| Pyogenic arthritis shoulder | 71101 |
| Rheumatoid arthritis | 7140 |
| Rheumatoid arthritis visceral/syst | 7142 |
| Uns inflammatory polyarthropathy | 7149 |
| Uns polyarthrit/arthropth site uns | 71650 |
| Effusion of joint shoulder | 71901 |
| Difficulty in walking | 7197 |
| Degenerat thoracic iv disc | 72251 |
| Oth syndromes affecting cervical | 7238 |
| Pain in thoracic spine | 7241 |
| Lumbago | 7242 |
| Uns thoracic/lumb neuritis/radicul | 7244 |
| Unspecified backache | 7245 |
| Oth symptoms referable to back | 7248 |
| Polymyalgia rheumatica | 725 |
| Oth affections shoulder region | 7262 |
| Muscle weakness (generalized) | 72887 |
| Rhabdomyolysis | 72888 |
| Rheumatism uns/fibrositis | 7290 |
| Unspecified myalgia and myositis | 7291 |
| Swelling of limb | 72981 |
| Acute osteomyelitis oth sites | 73008 |
| Uns osteomyelitis site uns | 73020 |
| Uns osteomyelitis oth sites | 73028 |
| Pathological fracture vertebrae | 73313 |
| Tietze's disease | 7336 |
| Kyphosis | 73710 |
| Scoliosis oth conditions | 73743 |
| Acquired deformity chest/rib | 7383 |
| Oth acquired deformity back/spine | 7385 |
| Tetralogy of Fallot | 7452 |
| Ventricular septal defect | 7454 |
| Ostium secundum type atrial septal defect | 7455 |
| Congenital stenosis of aortic valve | 7463 |
| Congenital insufficiency of aortic valve | 7464 |
| Congenital mitral insufficiency | 7466 |
| Congenital coronary artery anomaly | 74685 |
| Other specified congenital anomaly of heart | 74689 |
| Unspecified congenital anomaly of heart | 7469 |
| Congenital atresia and stenosis of aorta | 74722 |
| Oth anomalies aorta | 74729 |
| Uns anomaly lung | 74860 |
| Anomalies diaphragm | 7566 |
| Transient alteration of awareness | 78002 |
| Other alteration of consciousness | 78009 |
| Syncope and collapse | 7802 |
| Dizziness and giddiness | 7804 |
| Fever | 7806 |
| Fever unspecified | 78060 |
| Chronic fatigue syndrome | 78071 |
| Other malaise and fatigue | 78079 |
| Memory loss | 78093 |
| Altered mental status | 78097 |
| Localized superficial swelling | 7822 |
| Edema | 7823 |
| Spontaneous ecchymoses | 7827 |
| Loss of weight | 78321 |
| Headache | 7840 |
| Swelling/mass/lump in head/neck | 7842 |
| Epistaxis | 7847 |
| Jaw pain | 78492 |
| Unspecified tachycardia | 7850 |
| Palpitations | 7851 |
| Undiagnosed cardiac murmurs | 7852 |
| Other abnormal heart sounds | 7853 |
| Unspecified shock | 78550 |
| Cardiogenic shock | 78551 |
| Other shock without mention of trauma | 78559 |
| Enlargement of lymph nodes | 7856 |
| Other symptoms involving cardiovascular system | 7859 |
| Unspecified respiratory abnormality | 78600 |
| Hyperventilation | 78601 |
| Orthopnea | 78602 |
| Apnea | 78603 |
| Shortness of breath | 78605 |
| Tachypnea | 78606 |
| Wheezing | 78607 |
| Other dyspnea and respiratory abnormalities | 78609 |
| Cough | 7862 |
| Hemoptysis unspecified | 78630 |
| Chest pain, unspecified | 78650 |
| Precordial pain | 78651 |
| Painful respiration | 78652 |
| Chest pain, other | 78659 |
| Swelling/mass/lump in chest | 7866 |
| Other symptoms involving respiratory system and chest | 7869 |
| Dysphagia | 7872 |
| Abdominal pain, unspecified site | 78900 |
| Abdominal pain, right upper quadrant | 78901 |
| Abdom pain l upper quad | 78902 |
| Abdominal pain periumbilic | 78905 |
| Abdominal pain, epigastric | 78906 |
| Abdominal pain, generalized | 78907 |
| Abdominal pain, other specified site | 78909 |
| Abdom/pelvic swelling unsp site | 78930 |
| Other ascites | 78959 |
| Oth abnormality red blood cells | 79009 |
| Elevated sedimentation rate | 7901 |
| Other abnormal glucose | 79029 |
| Other nonspecific abnormal serum enzyme levels | 7905 |
| Oth abnormal blood chemistry | 7906 |
| Bacteremia | 7907 |
| Abnormal arterial blood gases | 79091 |
| Elevated c-reactive protein | 79095 |
| Nonspecific abnormal findings on radiological and other examination of lung field | 7931 |
| Abnormal findings lung field other | 79319 |
| Unsp abnormal mammogram | 79380 |
| Mammographic microcalcification | 79381 |
| Ot abnormal radiolog exam breast | 79389 |
| Nonspecific abnormal results of pulmonary system function study | 7942 |
| Nonspecific abnormal unspecified cardiovascular function study | 79430 |
| Nonspecific abnormal electrocardiogram (ECG) (EKG) | 79431 |
| Other nonspecific abnormal cardiovascular system function study | 79439 |
| Nonspecific reaction tb test | 7955 |
| Other abnormal tumor markers | 79589 |
| Hypoxemia | 79902 |
| Symptoms involv emotional state | 7992 |
| Fracture cervical vert unsp cl | 80500 |
| Fracture c2 vertebra closed | 80502 |
| Fracture c3 vertebra closed | 80503 |
| Fracture c4 vertebra closed | 80504 |
| Fracture c5 vertebra closed | 80505 |
| Fracture c6 vertebra closed | 80506 |
| Fracture c7 vertebra closed | 80507 |
| Fracture mult cervical vert cl | 80508 |
| Fracture dorsal vertebra close | 8052 |
| Fracture lumbar vertebra close | 8054 |
| Vertebral fracture unsp closed | 8058 |
| C1-c4 fracture clos/cord inj unsp | 80600 |
| C5-c7 fracture clos/cord inj unsp | 80605 |
| Closed fracture two ribs | 80702 |
| Closed fracture multiple ribs uns | 80709 |
| Closed fracture uns part clavicle | 81000 |
| Fracture gr tuberos humerus closed | 81203 |
| Disloc shoulder unsp closed | 83100 |
| Traum subarachnoid hemorrage | 85200 |
| Traumatic subdural hemorrage | 85220 |
| Traumatic brain hemorrage ot | 85300 |
| Intracranial injury ot | 85400 |
| Traumatic pneumothorax wo open wd | 8600 |
| Lung contusion wo open wound | 86121 |
| Contusion face/scalp/nck | 920 |
| Contusion of shoulder region | 92300 |
| Contusion of uns site | 9249 |
| C1-c4 inj w central cord syndrome | 95203 |
| Uns head injury | 95901 |
| Injury face/neck | 95909 |
| Other injury of abdomen | 95912 |
| Other injury other sites of trunk | 95919 |
| Oth/uns injury shoulder/upper arm | 9592 |
| Injury other sites inc mult sites | 9598 |
| Injury uns site | 9599 |
| Poisoning anticoagulants | 9642 |
| Other/unspec adverse effect drug | 9952 |
| Other adverse effect drug | 99529 |
| Sepsis | 99591 |
| Mechanical complication due to cardiac pacemaker (electrode) | 99601 |
| Mechanical complication due to coronary bypass graft | 99603 |
| Malfunction vasc device/graf | 9961 |
| Other complications due to other cardiac device, implant, and graft | 99672 |
| Complications of transplanted heart | 99683 |
| Complication lung transplant | 99684 |
| Cardiac complications | 9971 |
| Hematoma complication proced | 99812 |
| Accidental op laceration | 9982 |
| Other postop infection | 99859 |
| Traffic acc nos-pers nos | E8199 |
| Acc cut/hem in surgery | E8700 |
| Abn react-surg proc nec | E8788 |
| Fall from slipping nec | E8859 |
| Fall nec | E8888 |
| Fall nos | E8889 |
| Accident nos | E9289 |
| Adv eff antineoplastic | E9331 |
| Adv eff antilipemics | E9422 |
| Contact/exposure to tb | V011 |
| History malignancy bladder | V1051 |
| History other malignancy skin | V1083 |
| History tuberculosis | V1201 |
| Unspecified circulatory disease | V1250 |
| Personal history of other diseases of circulatory system | V1259 |
| History pneumonia | V1261 |
| Personal history of surgery to heart and great vessels, presenting hazards to health | V151 |
| History exposure to asbestos | V1584 |
| History of fall | V1588 |
| Kidney replaced by transplant | V420 |
| Heart replaced by transplant | V421 |
| Heart valve replaced by transplant | V422 |
| Lung replaced by transplant | V426 |
| Heart valve replaced by other means | V433 |
| Cardiac pacemaker in situ | V4501 |
| Automatic implantable cardiac defibrillator in situ | V4502 |
| Postprocedural aortocoronary bypass status | V4581 |
| Postprocedural percutaneous transluminal coronary angioplasty status | V4582 |
| Other cardiorespiratory problems | V472 |
| Awaiting organ transplant status | V4983 |
| Fitting and adjustment of cardiac pacemaker | V5331 |
| Removal int fixation device | V5401 |
| Encounter for antineoplastic chemotherapy | V5811 |
| Aftercare following organ transplant | V5844 |
| Encounter for long-term (current) use of other medications | V5869 |
| Encounter for therapeutic drug monitoring | V5883 |
| Follow-up examination following completed treatment with high-risk medications, not elsewhere classified | V6751 |
| Observ suspected tb | V712 |
| Observ following oth accident | V714 |
| Observation for suspected cardiovascular disease | V717 |
| Screening for pulmonary tb | V741 |
| Screening mammogram ot | V7612 |
| Special screening mal neo ot | V7649 |
| Screening for defic anemia ot | V781 |
|  |  |

*ICD-9 Codes for Excluding Cardiovascular Stress Tests*

See advanced imaging criteria.

*ICD-9 Codes for Excluding Echocardiograms*

Echocardiograms were excluded from the analysis if the associated primary, secondary, tertiary, or quaternary diagnosis involved: (i) proximal fractures; (ii) pulmonary and chest conditions, including anything potentially resulting in chest pain (e.g., chest wall contusion); (iii) esophageal conditions (e.g., esophagitis and esophageal spasm), except those that are painless, mild, and chronic (e.g., esophageal stricture, Barrett’s esophagus, and reflux); (iv) cardiac conditions, including shortness of breath, edema, congestive heart failure and anatomic anomalies; (v) end stage renal disease and dialysis, along with all electrolyte abnormalities; (vi) infections, including sepsis, but not urinary tract infections or pneumonia; (vii) anemia and bleeding conditions, except microscopic hematuria; (viii) abdominal conditions (including abdominal pain), but not benign tumor of the colon; (ix) psychiatric conditions; (x) acute central nervous system conditions (e.g., cerebrovascular accident, delirium) and seizure or epilepsy conditions, but not chronic conditions (e.g., dementia), head ache, or migraine; (xi) drug toxicity and poisoning; (xii) transplants; (xiii) malignant hypertension; (xiv) cancers; (xv) conditions involving arterial and pulmonary emboli, but not peripheral deep vein thrombosis; (xvi) falls; (xvii) autoimmune conditions; or (xviii) pain in the anterior and posterior thorax and shoulder areas (eg. back pain), but not specific shoulder conditions such as “capsular adhesion of shoulder” and “osteoarthrosis of shoulder.”

| **Label** | **Code** |
| --- | --- |
| Pulmonary diseases other mycobact | 0310 |
| Streptococcal septicemia | 0380 |
| Unspecified staphylococcal septicemia | 03810 |
| Methicillin susceptible Staphylococcus aureus septicemia | 03811 |
| Methicillin resistant Staphylococcus aureus septicemia | 03812 |
| Other staphylococcal septicemia | 03819 |
| Pneumococcal septicemia | 0382 |
| Septicemia due to anaerobes | 0383 |
| Septicemia due to unspecified gram-negative organism | 03840 |
| Septicemia due to Escherichia coli (E. Coli) | 03842 |
| Septicemia due to pseudomonas | 03843 |
| Other septicemia due to gram-negative organism | 03849 |
| Other specified septicemia | 0388 |
| Unspecified septicemia | 0389 |
| Methicillin susceptible Staphylococcus aureus | 04111 |
| Methicillin resistant Staphylococcus aureus | 04112 |
| Human immunodeficiency virus [HIV] | 042 |
| Unspecified viral infection | 07999 |
| Lyme disease | 08881 |
| Candidal endocarditis | 11281 |
| Other and unspecified mycoses | 1179 |
| Sarcoidosis | 135 |
| Unspecified infectious and parasitic diseases | 1369 |
| Malignant neoplasm of esophagus, unspecified site | 1509 |
| Malignant neoplasm of cardia | 1510 |
| Malignant neoplasm of stomach, unspecified site | 1519 |
| Malignant neoplasm of hepatic flexure | 1530 |
| Malignant neoplasm of transverse colon | 1531 |
| Malignant neoplasm of descending colon | 1532 |
| Malignant neoplasm of sigmoid colon | 1533 |
| Malignant neoplasm of cecum | 1534 |
| Malignant neoplasm of ascending colon | 1536 |
| Malignant neoplasm of colon, unspecified site | 1539 |
| Malignant neoplasm of rectosigmoid junction | 1540 |
| Malignant neoplasm of rectum | 1541 |
| Malignant neoplasm of liver, primary | 1550 |
| Malignant neoplasm of head of pancreas | 1570 |
| Malignant neoplasm of pancreas, part unspecified | 1579 |
| Malignant neoplasm of main bronchus | 1622 |
| Malignant neoplasm of upper lobe, bronchus, or lung | 1623 |
| Malignant neoplasm of middle lobe, bronchus, or lung | 1624 |
| Malignant neoplasm of lower lobe, bronchus, or lung | 1625 |
| Malignant neoplasm of other parts of bronchus or lung | 1628 |
| Malignant neoplasm of bronchus and lung, unspecified site | 1629 |
| Malignant neoplasm of heart | 1641 |
| Oth malig neo ear skin external | 1732 |
| Malig neo skin oth uns parts face | 1733 |
| Oth malignant neo scalp/skin neck | 1734 |
| Oth malig neo skin l limb inc hip | 1737 |
| Oth malignant neo skin site uns | 1739 |
| Malignant neoplasm of central portion of female breast | 1741 |
| Malignant neoplasm of upper-outer quadrant of female breast | 1744 |
| Malignant neoplasm of other specified sites of female breast | 1748 |
| Malignant neoplasm of breast (female), unspecified site | 1749 |
| Malignant neoplasm of corpus uteri, except isthmus | 1820 |
| Malignant neoplasm of ovary | 1830 |
| Malignant neoplasm of prostate | 185 |
| Malignant neoplasm of other specified sites of bladder | 1888 |
| Malignant neoplasm of bladder, part unspecified | 1889 |
| Malignant neoplasm of kidney, except pelvis | 1890 |
| Malignant neo thyroid gland | 193 |
| Secondary malignant neoplasm of lung | 1970 |
| Secondary malignant neoplasm of pleura | 1972 |
| Secondary malignant neoplasm of retroperitoneum and peritoneum | 1976 |
| Secondary malignant neoplasm of liver | 1977 |
| Secondary malignant neoplasm of brain and spinal cord | 1983 |
| Secondary malignant neoplasm of bone and bone marrow | 1985 |
| Secondary malignant neoplasm of other specified sites | 19889 |
| Other malignant neoplasm of unspecified site | 1991 |
| Hodgkin's disease, unspecified type, unspecified site, extranodal and solid organ sites | 20190 |
| Nodular lymphoma, unspecified site, extranodal and solid organ sites | 20200 |
| Other malignant lymphomas, unspecified site, extranodal and solid organ sites | 20280 |
| Other malignant lymphomas of lymph nodes of head, face, and neck | 20281 |
| Other malignant lymphomas of intra-abdominal lymph nodes | 20283 |
| Other malignant lymphomas of lymph nodes of multiple sites | 20288 |
| Multiple myeloma, without mention of having achieved remission | 20300 |
| Acute lymphoid leukemia, without mention of having achieved remission | 20400 |
| Chronic lymphoid leukemia, without mention of having achieved remission | 20410 |
| Acute myeloid leukemia, without mention of having achieved remission | 20500 |
| Chronic myeloid leukemia, without mention of having achieved remission | 20510 |
| Unspecified leukemia, without mention of having achieved remission | 20890 |
| Benign neoplasm bronchus/lung | 2123 |
| Benign neoplasm of heart | 2127 |
| Benign neoplasm cerebral meninges | 2252 |
| Carcinoma in situ of bronchus and lung | 2312 |
| Carcinoma in situ of breast | 2330 |
| Ca in situ prostate | 2334 |
| Uncert behavior neo intestine | 2352 |
| Uncert behavior neo lung | 2357 |
| Uncert behavior neo prostate | 2365 |
| Uncert behavior neo bladder | 2367 |
| Uncert behavior neo kidney | 23691 |
| Uncert behavior neo skin | 2382 |
| Uncert behavior neo breast | 2383 |
| Polycythemia vera | 2384 |
| Essential thrombocythemia | 23871 |
| Lo gr myelodysplastic synd lesions | 23872 |
| Myelodysplastic syndrome, unspecified | 23875 |
| Neoplasm of uncertain behavior of other specified sites | 2388 |
| Neoplasm of uncertain behavior, site unspecified | 2389 |
| Neoplasm of unspecified nature of digestive system | 2390 |
| Neoplasm of unspecified nature of respiratory system | 2391 |
| Bone/skin unsp behavior neo | 2392 |
| Neoplasm of unspecified nature of breast | 2393 |
| Bladder unsp behavior neo | 2394 |
| Ot gu unsp behavior neo | 2395 |
| Neoplasm of unspecified nature of brain | 2396 |
| Endonerv unsp behavior neo | 2397 |
| Neoplasm of unspecified nature of other specified sites | 2398 |
| Neoplasms of unspecified nature, other specified sites | 23989 |
| Neoplasm of unspecified nature, site unspecified | 2399 |
| Acute thyroiditis | 2450 |
| Diabetes hypersmolarity type ii | 25020 |
| Glucocorticoid deficiency | 25541 |
| Carcinoid syndrome | 2592 |
| Uns protein calorie malnutrition | 2639 |
| Disturb sulphur amino acid metabol | 2704 |
| Monoclonal paraproteinemia | 2731 |
| Disorders of iron metabolism | 2750 |
| Disorders magnesium metabolism | 2752 |
| Disorders phosphorus metabolism | 2753 |
| Uns disorder calcium metabolism | 27540 |
| Hypocalcemia | 27541 |
| Hypercalcemia | 27542 |
| Oth disorders calcium metabolism | 27549 |
| Hyperosmolality/or hypernatremia | 2760 |
| Hyposmolality/or hyponatremia | 2761 |
| Acidosis | 2762 |
| Volume depletion, unspecified | 27650 |
| Dehydration | 27651 |
| Fluid overload | 2766 |
| Fluid overload nec (other fluid overload) | 27669 |
| Hyperpotassemia | 2767 |
| Hypopotassemia | 2768 |
| Electrolyte/fluid disorders oth | 2769 |
| Amyloidosis | 2773 |
| Amyloidosis, unspecified | 27730 |
| Other amyloidosis | 27739 |
| Autoimmune disease, not elsewhere classified | 2794 |
| Iron deficiency anemia blood loss | 2800 |
| Iron def anemia inadeq iron intake | 2801 |
| Other iron deficiency anemias | 2808 |
| Uns iron deficiency anemia | 2809 |
| Pernicious anemia | 2810 |
| Oth vitamin b12 deficiency anemia | 2811 |
| Folate deficiency anemia | 2812 |
| Other megaloblastic anemias oth | 2813 |
| Anemia w ot nutritional deficiency | 2818 |
| Uns deficiency anemia | 2819 |
| Sickle-cell disease, unspecified | 28260 |
| Hb-SS disease with crisis | 28262 |
| Uns acquired hemolytic anemia | 2839 |
| Pancytopenia | 2841 |
| Other aplastic anemias | 2848 |
| Sideroblastic anemia | 2850 |
| Anemia chronic kidney disease | 28521 |
| Anemia of other chronic disease | 28529 |
| Other specified anemias | 2858 |
| Anemia unspecified | 2859 |
| Defibrination syndrome | 2866 |
| Oth nonthrombocytopenic purpuras | 2872 |
| Primary thrombocytopenia unspec | 28730 |
| Immune thrombocytopenic purpura | 28731 |
| Uns thrombocytopenia | 2875 |
| Neutropenia unspecified | 28800 |
| Functional disord neutrophils | 2881 |
| Leukocytopenia unspecified | 28850 |
| Leukocytosis unspecified | 28860 |
| Other disease white blood cells | 2888 |
| Polycythemia secondary | 2890 |
| Ot dis blood/blood forming organs | 28989 |
| Uns dis blood/blood forming organs | 2899 |
| Drug-induced delirium | 29281 |
| Delirium due to conditions classified elsewhere | 2930 |
| Uns schizophrenia | 29590 |
| Depressive type psychosis | 29620 |
| Maj depress dis recurr epi uns | 29630 |
| Maj depress dis recur epi sev | 29633 |
| Bipolar i disorder unspecified | 2967 |
| Bipolar disorder unspecified | 29680 |
| Unspecified psychosis | 2989 |
| Anxiety state unspecified | 30000 |
| Panic disorder wo agoraphobia | 30001 |
| Generalized anxiety disorder | 30002 |
| Dysthymic disorder | 3004 |
| Psychosex dysfunc inhibited excite | 30272 |
| Oth/uns alcohol dependence uns | 30390 |
| Opioid type dependence uns | 30400 |
| Opioid type dependence continuous | 30401 |
| Unspec drug dependence uns | 30490 |
| Alcohol abuse unspec | 30500 |
| Oth mixed/uns drug abuse uns | 30590 |
| Adjustment disorder mixed | 30928 |
| Personality chg due to oth cond | 3101 |
| Depressive disorder other | 311 |
| Obstructive hydrocephalus | 3314 |
| Carotid sinus syndrome | 33701 |
| Other acute postoperative pain | 33818 |
| Multiple sclerosis | 340 |
| Encephalopathy, unspecified | 34830 |
| Metabolic encephalopathy | 34831 |
| Other encephalopathy | 34839 |
| Toxic encephalopathy | 34982 |
| Myasthenia gravis with (acute) exacerbation | 35801 |
| Hereditary progressive muscular dystrophy | 3591 |
| Unspecified retinal vascular occlusion | 36230 |
| Central artery occlusion of retina | 36231 |
| Arterial branch occlusion of retina | 36232 |
| Partial arterial occlusion of retina | 36233 |
| Transient arterial occlusion of retina | 36234 |
| Sudden visual loss | 36811 |
| Other visual disturbances | 3688 |
| Uns peripheral vertigo | 38610 |
| Benign paroxysmal position vertigo | 38611 |
| Rheumatic fever without mention of heart involvement | 390 |
| Acute rheumatic pericarditis | 3910 |
| Acute rheumatic endocarditis | 3911 |
| Other acute rheumatic heart disease | 3918 |
| Unspecified acute rheumatic heart disease | 3919 |
| Chronic rheumatic pericarditis | 393 |
| Mitral stenosis | 3940 |
| Rheumatic mitral insufficiency | 3941 |
| Mitral stenosis with insufficiency | 3942 |
| Other and unspecified mitral valve diseases | 3949 |
| Rheumatic aortic stenosis | 3950 |
| Rheumatic aortic insufficiency | 3951 |
| Rheumatic aortic stenosis with insufficiency | 3952 |
| Other and unspecified rheumatic aortic diseases | 3959 |
| Mitral valve stenosis and aortic valve stenosis | 3960 |
| Mitral valve stenosis and aortic valve insufficiency | 3961 |
| Mitral valve insufficiency and aortic valve stenosis | 3962 |
| Mitral valve insufficiency and aortic valve insufficiency | 3963 |
| Multiple involvement of mitral and aortic valves | 3968 |
| Unspecified mitral and aortic valve diseases | 3969 |
| Diseases of tricuspid valve | 3970 |
| Rheumatic diseases of pulmonary valve | 3971 |
| Rheumatic diseases of endocardium, valve unspecified | 3979 |
| Rheumatic myocarditis | 3980 |
| Unspecified rheumatic heart disease | 39890 |
| Rheumatic heart failure (congestive) | 39891 |
| Other and unspecified rheumatic heart diseases | 39899 |
| Malignant hypertensive heart disease without heart failure | 40200 |
| Malignant hypertensive heart disease with heart failure | 40201 |
| Benign hypertensive heart disease without heart failure | 40210 |
| Benign hypertensive heart disease with heart failure | 40211 |
| Hypertensive heart dis unspec | 40290 |
| Hypertensive heart disease, unspecified, with heart failure | 40291 |
| Mal kid hyper w ckd stage i-iv | 40300 |
| Hypertensive chronic kidney disease, benign, with chronic kidney disease stage I-IV | 40310 |
| Hypertensive heart and chronic kidney disease, malignant, without heart failure and with chronic kidney disease stage I-IV | 40400 |
| Hypertensive heart and chronic kidney disease, malignant, with heart failure and with chronic kidney disease stage I-IV | 40401 |
| Hypertensive heart and chronic kidney disease, malignant, without heart failure and with chronic kidney disease stage V | 40402 |
| Hypertensive heart and chronic kidney disease, malignant, with heart failure and with chronic kidney disease stage V | 40403 |
| Hypertensive heart and chronic kidney disease, benign, without heart failure and with chronic kidney disease stage I-IV | 40410 |
| Hypertensive heart and chronic kidney disease, benign, with heart failure and with chronic kidney disease stage I-IV | 40411 |
| Hypertensive heart and chronic kidney disease, benign, without heart failure and with chronic kidney disease stage V | 40412 |
| Hypertensive heart and chronic kidney disease, benign, with heart failure and with chronic kidney disease stage V | 40413 |
| Hypertensive heart and chronic kidney disease, unspecified, without heart failure and with chronic kidney disease stage I-IV | 40490 |
| Hypertensive heart and chronic kidney disease, unspecified, with heart failure and with chronic kidney disease stage I-IV | 40491 |
| Hypertensive heart and chronic kidney disease, unspecified, without heart failure and with chronic kidney disease stage V | 40492 |
| Hypertensive heart and chronic kidney disease, unspecified, with heart failure and with chronic kidney disease stage V | 40493 |
| Secondary renovascular hypertension, malignant | 40501 |
| Secondary renovascular hypertension, benign | 40511 |
| Acute myocardial infarction of anterolateral wall, episode of care unspecified | 41000 |
| Acute myocardial infarction of anterolateral wall, initial episode of care | 41001 |
| Acute myocardial infarction of anterolateral wall, subsequent episode of care | 41002 |
| Acute myocardial infarction of other anterior wall, episode of care unspecified | 41010 |
| Acute myocardial infarction of other anterior wall, initial episode of care | 41011 |
| Acute myocardial infarction of other anterior wall, subsequent episode of care | 41012 |
| Acute myocardial infarction of inferolateral wall, episode of care unspecified | 41020 |
| Acute myocardial infarction of inferolateral wall, initial episode of care | 41021 |
| Acute myocardial infarction of inferolateral wall, subsequent episode of care | 41022 |
| Acute myocardial infarction of inferoposterior wall, episode of care unspecified | 41030 |
| Acute myocardial infarction of inferoposterior wall, initial episode of care | 41031 |
| Acute myocardial infarction of inferoposterior wall, subsequent episode of care | 41032 |
| Acute myocardial infarction of other inferior wall, episode of care unspecified | 41040 |
| Acute myocardial infarction of other inferior wall, initial episode of care | 41041 |
| Acute myocardial infarction of other inferior wall, subsequent episode of care | 41042 |
| Acute myocardial infarction of other lateral wall, episode of care unspecified | 41050 |
| Acute myocardial infarction of other lateral wall, initial episode of care | 41051 |
| Acute myocardial infarction of other lateral wall, subsequent episode of care | 41052 |
| Acute myocardial infarction, true posterior wall infarction, episode of care unspecified | 41060 |
| Acute myocardial infarction, true posterior wall infarction, initial episode of care | 41061 |
| Acute myocardial infarction, true posterior wall infarction, subsequent episode of care | 41062 |
| Acute myocardial infarction, subendocardial infarction, episode of care unspecified | 41070 |
| Acute myocardial infarction, subendocardial infarction, initial episode of care | 41071 |
| Acute myocardial infarction, subendocardial infarction, subsequent episode of care | 41072 |
| Acute myocardial infarction of other specified sites, episode of care unspecified | 41080 |
| Acute myocardial infarction of other specified sites, initial episode of care | 41081 |
| Acute myocardial infarction of other specified sites, subsequent episode of care | 41082 |
| Acute myocardial infarction, unspecified site, episode of care unspecified | 41090 |
| Acute myocardial infarction, unspecified site, initial episode of care | 41091 |
| Acute myocardial infarction, unspecified site, subsequent episode of care | 41092 |
| Postmyocardial infarction syndrome | 4110 |
| Intermediate coronary syndrome | 4111 |
| Acute coronary occlusion without myocardial infarction | 41181 |
| Other acute and subacute form of ischemic heart disease | 41189 |
| Old myocardial infarction | 412 |
| Angina decubitus | 4130 |
| Prinzmetal angina | 4131 |
| Other and unspecified angina pectoris | 4139 |
| Coronary atherosclerosis of unspecified type of vessel, native or graft | 41400 |
| Coronary atherosclerosis of native coronary artery | 41401 |
| Coronary atherosclerosis of autologous vein bypass graft | 41402 |
| Coronary atherosclerosis of nonautologous biological bypass graft | 41403 |
| Coronary atherosclerosis of artery bypass graft | 41404 |
| Coronary atherosclerosis of unspecified type of bypass graft | 41405 |
| Coronary atherosclerosis, of native coronary artery of transplanted heart | 41406 |
| Coronary atherosclerosis, of bypass graft (artery) (vein) of transplanted heart | 41407 |
| Aneurysm of heart | 41410 |
| Aneurysm of coronary vessels | 41411 |
| Dissection of coronary artery | 41412 |
| Other aneurysm of heart | 41419 |
| Chronic total occlusion of coronary artery | 4142 |
| Coronary atherosclerosis due to lipid rich plaque | 4143 |
| Other specified forms of chronic ischemic heart disease | 4148 |
| Unspecified chronic ischemic heart disease | 4149 |
| Acute cor pulmonale | 4150 |
| Iatrogenic pulmonary embolism and infarction | 41511 |
| Septic pulmonary embolism | 41512 |
| Other pulmonary embolism and infarction | 41519 |
| Primary pulmonary hypertension | 4160 |
| Kyphoscoliotic heart disease | 4161 |
| Chronic pulmonary embolism | 4162 |
| Other chronic pulmonary heart diseases | 4168 |
| Unspecified chronic pulmonary heart disease | 4169 |
| Arteriovenous fistula of pulmonary vessels | 4170 |
| Aneurysm of pulmonary artery | 4171 |
| Other specified disease of pulmonary circulation | 4178 |
| Unspecified disease of pulmonary circulation | 4179 |
| Acute pericarditis in diseases classified elsewhere | 4200 |
| Unspecified acute pericarditis | 42090 |
| Acute idiopathic pericarditis | 42091 |
| Other acute pericarditis | 42099 |
| Acute and subacute bacterial endocarditis | 4210 |
| Acute and subacute infective endocarditis in diseases classified elsewhere | 4211 |
| Unspecified acute endocarditis | 4219 |
| Acute myocarditis in diseases classified elsewhere | 4220 |
| Unspecified acute myocarditis | 42290 |
| Idiopathic myocarditis | 42291 |
| Septic myocarditis | 42292 |
| Toxic myocarditis | 42293 |
| Hemopericardium | 4230 |
| Adhesive pericarditis | 4231 |
| Constrictive pericarditis | 4232 |
| Cardiac tamponade | 4233 |
| Other specified diseases of pericardium | 4238 |
| Unspecified disease of pericardium | 4239 |
| Mitral valve disorders | 4240 |
| Aortic valve disorders | 4241 |
| Tricuspid valve disorders, specified as nonrheumatic | 4242 |
| Pulmonary valve disorders | 4243 |
| Endocarditis, valve unspecified, unspecified cause | 42490 |
| Endocarditis in diseases classified elsewhere | 42491 |
| Other endocarditis, valve unspecified | 42499 |
| Endomyocardial fibrosis | 4250 |
| Hypertrophic obstructive cardiomyopathy | 4251 |
| Hypertrophic obstructive cardiomyopathy | 42511 |
| Other hypertrophic cardiomyopathy | 42518 |
| Obscure cardiomyopathy of Africa | 4252 |
| Endocardial fibroelastosis | 4253 |
| Other primary cardiomyopathies | 4254 |
| Alcoholic cardiomyopathy | 4255 |
| Nutritional and metabolic cardiomyopathy | 4257 |
| Cardiomyopathy in other diseases classified elsewhere | 4258 |
| Unspecified secondary cardiomyopathy | 4259 |
| Atrioventricular block, complete | 4260 |
| Unspecified atrioventricular block | 42610 |
| First degree atrioventricular block | 42611 |
| Mobitz (type) II atrioventricular block | 42612 |
| Other second degree atrioventricular block | 42613 |
| Left bundle branch hemiblock | 4262 |
| Other left bundle branch block | 4263 |
| Right bundle branch block | 4264 |
| Unspecified bundle branch block | 42650 |
| Right bundle branch block and left posterior fascicular block | 42651 |
| Right bundle branch block and left anterior fascicular block | 42652 |
| Other bilateral bundle branch block | 42653 |
| Trifascicular block | 42654 |
| Other heart block | 4266 |
| Anomalous atrioventricular excitation | 4267 |
| Long QT syndrome | 42682 |
| Other specified conduction disorder | 42689 |
| Unspecified conduction disorder | 4269 |
| Paroxysmal supraventricular tachycardia | 4270 |
| Paroxysmal ventricular tachycardia | 4271 |
| Unspecified paroxysmal tachycardia | 4272 |
| Atrial fibrillation | 42731 |
| Atrial flutter | 42732 |
| Ventricular fibrillation | 42741 |
| Ventricular flutter | 42742 |
| Cardiac arrest | 4275 |
| Unspecified premature beats | 42760 |
| Supraventricular premature beats | 42761 |
| Other premature beats | 42769 |
| Sinoatrial node dysfunction | 42781 |
| Other specified cardiac dysrhythmias | 42789 |
| Unspecified cardiac dysrhythmia | 4279 |
| Congestive heart failure, unspecified | 4280 |
| Left heart failure | 4281 |
| Unspecified systolic heart failure | 42820 |
| Acute systolic heart failure | 42821 |
| Chronic systolic heart failure | 42822 |
| Acute on chronic systolic heart failure | 42823 |
| Unspecified diastolic heart failure | 42830 |
| Acute diastolic heart failure | 42831 |
| Chronic diastolic heart failure | 42832 |
| Acute on chronic diastolic heart failure | 42833 |
| Unspecified combined systolic and diastolic heart failure | 42840 |
| Acute combined systolic and diastolic heart failure | 42841 |
| Chronic combined systolic and diastolic heart failure | 42842 |
| Acute on chronic combined systolic and diastolic heart failure | 42843 |
| Unspecified heart failure | 4289 |
| Unspecified myocarditis | 4290 |
| Myocardial degeneration | 4291 |
| Unspecified cardiovascular disease | 4292 |
| Cardiomegaly | 4293 |
| Functional disturbances following cardiac surgery | 4294 |
| Rupture of chordae tendineae | 4295 |
| Rupture of papillary muscle | 4296 |
| Acquired cardiac septal defect | 42971 |
| Other certain sequelae of myocardial infarction, not elsewhere classified | 42979 |
| Other disorders of papillary muscle | 42981 |
| Hyperkinetic heart disease | 42982 |
| Takotsubo syndrome | 42983 |
| Other ill-defined heart disease | 42989 |
| Unspecified heart disease | 4299 |
| Subarachnoid hemorrhage | 430 |
| Intracerebral hemorrhage | 431 |
| Subdural hemorrhage | 4321 |
| Unspecified intracranial hemorrhage | 4329 |
| Occlusion and stenosis of basilar artery without mention of cerebral infarction | 43300 |
| Occlusion and stenosis of basilar artery with cerebral infarction | 43301 |
| Occlusion and stenosis of carotid artery without mention of cerebral infarction | 43310 |
| Occlusion and stenosis of carotid artery with cerebral infarction | 43311 |
| Occlusion vertebral artery wo infar | 43320 |
| Occlusion and stenosis of multiple and bilateral precerebral arteries without mention of cerebral infarction | 43330 |
| Occlusion and stenosis of multiple and bilateral precerebral arteries with cerebral infarction | 43331 |
| Occlusion and stenosis of unspecified precerebral artery without mention of cerebral infarction | 43390 |
| Occlusion and stenosis of unspecified precerebral artery with cerebral infarction | 43391 |
| Cerebral thrombosis without mention of cerebral infarction | 43400 |
| Cerebral thrombosis with cerebral infarction | 43401 |
| Cerebral embolism without mention of cerebral infarction | 43410 |
| Cerebral embolism with cerebral infarction | 43411 |
| Unspecified cerebral artery occlusion without mention of cerebral infarction | 43490 |
| Unspecified cerebral artery occlusion with cerebral infarction | 43491 |
| Basilar artery syndrome | 4350 |
| Vertebral artery syndrome | 4351 |
| Subclavian steal syndrome | 4352 |
| Vertebrobasilar artery syndrome | 4353 |
| Other specified transient cerebral ischemias | 4358 |
| Unspecified transient cerebral ischemia | 4359 |
| Acute, but ill-defined, cerebrovascular disease | 436 |
| Other generalized ischemic cerebrovascular disease | 4371 |
| Hypertensive encephalopathy | 4372 |
| Cerebral aneurysm nonruptured | 4373 |
| Transient global amnesia | 4377 |
| Unspecified cerebrovascular disease | 4379 |
| Hemiplegia affecting unspecified side due to cerebrovascular disease | 43820 |
| Vertigo | 43885 |
| Uns late effects cv disease | 4389 |
| Atherosclerosis of aorta | 4400 |
| Atherosclerosis of native arteries of the extremities, unspecified | 44020 |
| Atherosclerosis of native arteries of the extremities with intermittent claudication | 44021 |
| Atherosclerosis of native arteries of the extremities with rest pain | 44022 |
| Atherosclerosis of native arteries of the extremities with ulceration | 44023 |
| Atherosclerosis of native arteries of the extremities with gangrene | 44024 |
| Other atherosclerosis of native arteries of the extremities | 44029 |
| Generalized and unspecified atherosclerosis | 4409 |
| Dissecting aortic aneurysm (any part), unspecified site | 44100 |
| Dissecting aortic aneurysm (any part), thoracic | 44101 |
| Dissecting aortic aneurysm (any part), abdominal | 44102 |
| Dissecting aortic aneurysm (any part), thoracoabdominal | 44103 |
| Thoracic aneurysm, ruptured | 4411 |
| Thoracic aneurysm without mention of rupture | 4412 |
| Abdominal aneurysm, ruptured | 4413 |
| Abdominal aneurysm without mention of rupture | 4414 |
| Aortic aneurysm of unspecified site, ruptured | 4415 |
| Thoracoabdominal aneurysm, ruptured | 4416 |
| Thoracoabdominal aneurysm without mention of rupture | 4417 |
| Aortic aneurysm of unspecified site without mention of rupture | 4419 |
| Aneurysm of iliac artery | 4422 |
| Aneurysm of artery of lower extremity | 4423 |
| Aneurysm of artery of neck | 44281 |
| Other aneurysm of unspecified site | 4429 |
| Raynaud's syndrome | 4430 |
| Thromboangiitis obliterans (Buerger's disease) | 4431 |
| Peripheral angiopathy in diseases classified elsewhere | 44381 |
| Embolism and thrombosis of abdominal aorta | 4440 |
| Embolism and thrombosis of thoracic aorta | 4441 |
| Embolism and thrombosis of arteries of upper extremity | 44421 |
| Embolism and thrombosis of arteries of lower extremity | 44422 |
| Embolism and thrombosis of iliac artery | 44481 |
| Embolism and thrombosis of other specified artery | 44489 |
| Embolism and thrombosis of unspecified artery | 4449 |
| Atheroembolism of other site | 44589 |
| Wegener's granulomatosis | 4464 |
| Giant cell arteritis | 4465 |
| Takayasu's disease | 4467 |
| Stricture of artery | 4471 |
| Unspecified arteritis | 4476 |
| Aortic ectasia unspecified site | 44770 |
| Thoracic aortic ectasia | 44771 |
| Other specified disorders of arteries and arterioles | 4478 |
| Unspecified disorders of arteries and arterioles | 4479 |
| Embolism and thrombosis of vena cava | 4532 |
| Venous embolism and thrombosis of unspecified deep vessels of lower extremity | 45340 |
| Venous embolism and thrombosis of deep vessels of proximal lower extremity | 45341 |
| Venous embolism and thrombosis of deep vessels of distal lower extremity | 45342 |
| Venous embolism and thrombosis of other specified veins | 4538 |
| Embolism and thrombosis of unspecified site | 4539 |
| Orthostatic hypotension | 4580 |
| Chronic hypotension | 4581 |
| Hypotension of hemodialysis | 45821 |
| Other iatrogenic hypotension | 45829 |
| Other specified hypotension | 4588 |
| Unspecified hypotension | 4589 |
| Hemorrhage unspecified | 4590 |
| Other specified circulatory system disorders | 45989 |
| Unspecified circulatory system disorder | 4599 |
| Acute upper resp infect oth sites | 4658 |
| Acute upper respiratory infections of unspecified site | 4659 |
| Acute bronchitis | 4660 |
| Pneumonia adenovirus | 4800 |
| Pneumonia respiratory syncy virus | 4801 |
| Uns viral pneumonia | 4809 |
| Pneumococcal pneumonia | 481 |
| Methicillin susceptible pneumonia due to Staphylococcus aureus | 48241 |
| Pneumonia other bacteria | 48289 |
| Uns bacterial pneumonia | 4829 |
| Bronchopneumonia organism unspec | 485 |
| Pneumonia organism unspecified | 486 |
| Influenza with pneumonia | 4870 |
| Influenza w oth respiratory manif | 4871 |
| Obstructive chronic bronchitis, with (acute) exacerbation | 49121 |
| Obstructive chronic bronchitis with acute bronchitis | 49122 |
| Extrinsic asthma, unspecified | 49300 |
| Ex asthma w exacerbation | 49302 |
| Intrinsic asthma, unspecified | 49310 |
| Chronic obstructive asthma, unspecified | 49320 |
| Chronic obstructive asthma with status asthmaticus | 49321 |
| Chronic obstructive asthma, with (acute) exacerbation | 49322 |
| Asthma, unspecified, unspecified status | 49390 |
| Asthma, unspecified with status asthmaticus | 49391 |
| Asthma, unspecified, with (acute) exacerbation | 49392 |
| Bronchiectasis with acute exacerbation | 4941 |
| Chronic airway obstruction, not elsewhere classified | 496 |
| Pneumonitis inhalation food | 5070 |
| Empyema without mention of fistula | 5109 |
| Pleurisy without mention of effusion or current tuberculosis | 5110 |
| Pleurisy with effusion, with mention of bacterial cause other than tuberculosis | 5111 |
| Other specified forms of pleural effusion, except tuberculous | 5118 |
| Malignant pleural effusion | 51181 |
| Other specified forms of effusion, except tuberculous | 51189 |
| Unspecified pleural effusion | 5119 |
| Other spontaneous pneumothorax | 5128 |
| Abscess of lung | 5130 |
| Pulmonary congestion and hypostasis | 514 |
| Postinflammatory pulmonary fibrosis | 515 |
| Idiopathic fibrosing alveolitis | 5163 |
| Other specified alveolar and parietoalveolar pneumonopathies | 5168 |
| Uns alveolar pneumonopathy | 5169 |
| Pulmonary collapse | 5180 |
| Unspecified acute edema of lung | 5184 |
| Pulmonary insufficiency following trauma and surgery | 5185 |
| Acute respiratory failure | 51881 |
| Other pulmonary insufficiency, not elsewhere classified | 51882 |
| Chronic respiratory failure | 51883 |
| Acute and chronic respiratory failure | 51884 |
| Other diseases of lung, not elsewhere classified | 51889 |
| Acute bronchospasm | 51911 |
| Oth diseases trachea/bronchus | 51919 |
| Disorders diaphragm | 5194 |
| Oth diseases respiratory system | 5198 |
| Unspecified disease of respiratory system | 5199 |
| Uns esophagitis | 53010 |
| Reflux esophagitis | 53011 |
| Oth esophagitis | 53019 |
| Acute gastritis wohemorrhage | 53500 |
| Uns ulcerative colitis | 5569 |
| Acute vascular insufficiency of intestine | 5570 |
| Unspecified vascular insufficiency of intestine | 5579 |
| Diverticulosis of colon with hemorrhage | 56212 |
| Hemoperitoneum (nontraumatic) | 56881 |
| Hepatic coma | 5722 |
| Acute pancreatitis | 5770 |
| Hematemesis | 5780 |
| Celiac disease | 5790 |
| Acute renal failure with lesion of tubular necrosis | 5845 |
| Unspecified acute renal failure | 5849 |
| End stage renal disease | 5856 |
| Diffuse cystic mastopathy | 6101 |
| Mastodynia | 61171 |
| Lump or mass in breast | 61172 |
| Oth signs/symptoms in breast | 61179 |
| Postmenopausal bleeding | 6271 |
| Suspected damage to fetus from drugs, affecting management of mother, antepartum condition or complication | 65553 |
| Other known or suspected fetal abnormality, not elsewhere classified, affecting management of mother, antepartum condition or complication | 65583 |
| Unspecified fetal abnormality affecting management of mother, antepartum condition or complication | 65593 |
| Lupus erythematosus | 6954 |
| Psoriatic arthropathy | 6960 |
| Oth psoriasis | 6961 |
| Systemic lupus erythematosus | 7100 |
| Systemic sclerosis | 7101 |
| Sicca syndrome | 7102 |
| Uns diffuse connect tissue disease | 7109 |
| Pyogenic arthritis shoulder | 71101 |
| Rheumatoid arthritis | 7140 |
| Rheumatoid arthritis visceral/syst | 7142 |
| Uns inflammatory polyarthropathy | 7149 |
| Uns polyarthrit/arthropth site uns | 71650 |
| Effusion of joint shoulder | 71901 |
| Effusion of lower leg joint | 71906 |
| Degenerat thoracic iv disc | 72251 |
| Oth syndromes affecting cervical | 7238 |
| Pain in thoracic spine | 7241 |
| Uns thoracic/lumb neuritis/radicul | 7244 |
| Backache unspecified | 7245 |
| Oth symptoms referable to back | 7248 |
| Polymyalgia rheumatica | 725 |
| Oth affections shoulder region | 7262 |
| Muscle weakness | 72887 |
| Rhabdomyolysis | 72888 |
| Rheumatism uns/fibrositis | 7290 |
| Uns myalgia/myositis | 7291 |
| Swelling of limb | 72981 |
| Acute osteomyelitis oth sites | 73008 |
| Uns osteomyelitis site uns | 73020 |
| Uns osteomyelitis oth sites | 73028 |
| Pathological fracture vertebrae | 73313 |
| Tietze's disease | 7336 |
| Kyphosis | 73710 |
| Scoliosis oth conditions | 73743 |
| Acquired deformity chest/rib | 7383 |
| Oth acquired deformity back/spine | 7385 |
| Bulbus cordis anomalies and anomalies of cardiac septal closure, common truncus | 7450 |
| Complete transposition of great vessels | 74510 |
| Transposition of great vessels, double outlet right ventricle | 74511 |
| Corrected transposition of great vessels | 74512 |
| Other transposition of great vessels | 74519 |
| Tetralogy of Fallot | 7452 |
| Bulbus cordis anomalies and anomalies of cardiac septal closure, common ventricle | 7453 |
| Ventricular septal defect | 7454 |
| Ostium secundum type atrial septal defect | 7455 |
| Unspecified type congenital endocardial cushion defect | 74560 |
| Ostium primum defect | 74561 |
| Other congenital endocardial cushion defect | 74569 |
| Other bulbus cordis anomalies and anomalies of cardiac septal closure | 7458 |
| Unspecified congenital defect of septal closure | 7459 |
| Unspecified congenital pulmonary valve anomaly | 74600 |
| Congenital atresia of pulmonary valve | 74601 |
| Congenital stenosis of pulmonary valve | 74602 |
| Other congenital anomalies of pulmonary valve | 74609 |
| Congenital tricuspid atresia and stenosis | 7461 |
| Ebstein's anomaly | 7462 |
| Congenital stenosis of aortic valve | 7463 |
| Congenital insufficiency of aortic valve | 7464 |
| Congenital mitral stenosis | 7465 |
| Congenital mitral insufficiency | 7466 |
| Hypoplastic left heart syndrome | 7467 |
| Congenital subaortic stenosis | 74681 |
| Congenital obstructive anomalies of heart, not elsewhere classified | 74684 |
| Congenital coronary artery anomaly | 74685 |
| Congenital heart block | 74686 |
| Congenital malposition of heart and cardiac apex | 74687 |
| Other specified congenital anomaly of heart | 74689 |
| Unspecified congenital anomaly of heart | 7469 |
| Patent ductus arteriosus | 7470 |
| Coarctation of aorta (preductal) (postductal) | 74710 |
| Unspecified congenital anomaly of aorta | 74720 |
| Congenital anomaly of aortic arch | 74721 |
| Congenital atresia and stenosis of aorta | 74722 |
| Other congenital anomaly of aorta | 74729 |
| Congenital anomalies of pulmonary artery | 7473 |
| Partial congenital anomalous pulmonary venous connection | 74742 |
| Uns anomaly lung | 74860 |
| Anomalies diaphragm | 7566 |
| Down's syndrome | 7580 |
| Marfan's syndrome | 75982 |
| Other specified multiple congenital anomalies, so described | 75989 |
| Coma | 78001 |
| Transient alteration of awareness | 78002 |
| Other alteration of consciousness | 78009 |
| Syncope and collapse | 7802 |
| Dizziness and giddiness | 7804 |
| Fever and other physiologic disturbances of temperature regulation | 7806 |
| Fever, unspecified | 78060 |
| Fever presenting with conditions classified elsewhere | 78061 |
| Chronic fatigue syndrome | 78071 |
| Other malaise and fatigue | 78079 |
| Memory loss | 78093 |
| Altered mental status | 78097 |
| Localized superficial swelling | 7822 |
| Edema | 7823 |
| Cyanosis | 7825 |
| Spontaneous ecchymoses | 7827 |
| Loss of weight | 78321 |
| Headache | 7840 |
| Swelling/mass/lump in head/neck | 7842 |
| Epistaxis | 7847 |
| Unspecified tachycardia | 7850 |
| Palpitations | 7851 |
| Undiagnosed cardiac murmurs | 7852 |
| Other abnormal heart sounds | 7853 |
| Gangrene | 7854 |
| Unspecified shock | 78550 |
| Cardiogenic shock | 78551 |
| Septic shock | 78552 |
| Other shock without mention of trauma | 78559 |
| Enlargement of lymph nodes | 7856 |
| Other symptoms involving cardiovascular system | 7859 |
| Unspecified respiratory abnormality | 78600 |
| Hyperventilation | 78601 |
| Orthopnea | 78602 |
| Apnea | 78603 |
| Cheyne-Stokes respiration | 78604 |
| Shortness of breath | 78605 |
| Tachypnea | 78606 |
| Wheezing | 78607 |
| Other dyspnea and respiratory abnormalities | 78609 |
| Cough | 7862 |
| Hemoptysis | 7863 |
| Hemoptysis unspecified | 78630 |
| Chest pain, unspecified | 78650 |
| Precordial pain | 78651 |
| Painful respiration | 78652 |
| Chest pain, other | 78659 |
| Swelling/mass/lump in chest | 7866 |
| Abnormal chest sounds | 7867 |
| Other symptoms involving respiratory system and chest | 7869 |
| Dysphagia | 7872 |
| Abdominal pain uns site | 78900 |
| Abdom pain l upper quad | 78902 |
| Abdominal pain periumbilic | 78905 |
| Abdominal pain generalized | 78907 |
| Abdom/pelvic swelling unsp site | 78930 |
| Other ascites | 78959 |
| Oth abnormality red blood cells | 79009 |
| Elevated sedimentation rate | 7901 |
| Other abnormal glucose | 79029 |
| Oth abnormal blood chemistry | 7906 |
| Bacteremia | 7907 |
| Abnormal arterial blood gases | 79091 |
| Elevated c-reactive protein | 79095 |
| Abnormal findings lung field | 7931 |
| Abnormal findings lung field other | 79319 |
| Nonspecific abnormal findings on radiological and other examination of other intrathoracic organs | 7932 |
| Nonspecific abnormal findings on radiological and other examination of abdominal area, including retroperitoneum | 7936 |
| Unsp abnormal mammogram | 79380 |
| Mammographic microcalcification | 79381 |
| Ot abnormal radiolog exam breast | 79389 |
| Abnormal pulmonary func study | 7942 |
| Nonspecific abnormal unspecified cardiovascular function study | 79430 |
| Nonspecific abnormal electrocardiogram (ECG) (EKG) | 79431 |
| Other nonspecific abnormal cardiovascular system function study | 79439 |
| Nonspecific abnormal findings on chromosomal analysis | 7952 |
| Nonspecific reaction tb test | 7955 |
| Other abnormal tumor markers | 79589 |
| Nonspecific low blood pressure reading | 7963 |
| Asphyxia | 79901 |
| Hypoxemia | 79902 |
| Respiratory arrest | 7991 |
| Symptoms involv emotional state | 7992 |
| Fracture cervical vert unsp cl | 80500 |
| Fracture c2 vertebra closed | 80502 |
| Fracture c3 vertebra closed | 80503 |
| Fracture c4 vertebra closed | 80504 |
| Fracture c5 vertebra closed | 80505 |
| Fracture c6 vertebra closed | 80506 |
| Fracture c7 vertebra closed | 80507 |
| Fracture mult cervical vert cl | 80508 |
| Fracture dorsal vertebra close | 8052 |
| Fracture lumbar vertebra close | 8054 |
| Vertebral fracture unsp closed | 8058 |
| C1-c4 fracture clos/cord inj unsp | 80600 |
| C5-c7 fracture clos/cord inj unsp | 80605 |
| Closed fracture of rib(s), unspecified | 80700 |
| Closed fracture of one rib | 80701 |
| Closed fracture of two ribs | 80702 |
| Closed fracture of three ribs | 80703 |
| Closed fracture of multiple ribs, unspecified | 80709 |
| Closed fracture of sternum | 8072 |
| Flail chest | 8074 |
| Closed fracture uns part clavicle | 81000 |
| Fracture gr tuberos humerus closed | 81203 |
| Disloc shoulder unsp closed | 83100 |
| Subarachnoid hemorrhage following injury, without mention of open intracranial wound, unspecified state of consciousness | 85200 |
| Subarachnoid hemorrhage following injury, without mention of open intracranial wound, no loss of consciousness | 85201 |
| Traumatic subdural hemorrage | 85220 |
| Subdural hemorrhage following injury, without mention of open intracranial wound, with brief [less than one hour] loss of consciousness | 85222 |
| Subdural hemorrhage following injury, without mention of open intracranial wound, loss of consciousness of unspecified duration | 85226 |
| Other and unspecified intracranial hemorrhage following injury, without mention of open intracranial wound, unspecified state of consciousness | 85300 |
| Intracranial injury ot | 85400 |
| Traumatic pneumothorax without mention of open wound into thorax | 8600 |
| Traumatic hemothorax without mention of open wound into thorax | 8602 |
| Unspecified injury to heart without mention of open wound into thorax | 86100 |
| Heart contusion without mention of open wound into thorax | 86101 |
| Lung contusion wo open wound | 86121 |
| Contusion face/scalp/nck | 920 |
| Contusion of chest wall | 9221 |
| Contusion of shoulder region | 92300 |
| Contusion of uns site | 9249 |
| C1-c4 inj w central cord syndrome | 95203 |
| Traumatic shock | 9584 |
| Uns head injury | 95901 |
| Injury face/neck | 95909 |
| Other injury of chest wall | 95911 |
| Other injury of abdomen | 95912 |
| Other injury other sites of trunk | 95919 |
| Oth/uns injury shoulder/upper arm | 9592 |
| Injury other sites inc mult sites | 9598 |
| Injury uns site | 9599 |
| Poisoning by antineoplastic antibiotics | 9607 |
| Poisoning by antineoplastic and immunosuppressive drugs | 9631 |
| Poisoning by anticoagulants | 9642 |
| Poisoning by opium (alkaloids), unspecified | 96500 |
| Poisoning by opiates and related narcotics, other | 96509 |
| Poisoning by benzodiazepine-based tranquilizers | 9694 |
| Poisoning by cardiotonic glycosides and drugs of similar action | 9721 |
| Poisoning by unspecified drug or medicinal substance | 9779 |
| Effects of radiation, unspecified | 990 |
| Angioneurotic edema not elsewhere classified | 9951 |
| Other and unspecified adverse effect of drug, medicinal and biological substance | 9952 |
| Unspecified adverse effect of unspecified drug, medicinal and biological substance | 99520 |
| Unspecified adverse effect of other drug, medicinal and biological substance | 99529 |
| Sepsis | 99591 |
| Severe sepsis | 99592 |
| Mechanical complication of unspecified cardiac device, implant, and graft | 99600 |
| Mechanical complication due to cardiac pacemaker (electrode) | 99601 |
| Mechanical complication due to heart valve prosthesis | 99602 |
| Mechanical complication due to coronary bypass graft | 99603 |
| Mechanical complication due to automatic implantable cardiac defibrillator | 99604 |
| Mechanical complication of cardiac device, implant, and graft, other | 99609 |
| Mechanical complication of other vascular device, implant, and graft | 9961 |
| Infection and inflammatory reaction due to cardiac device, implant, and graft | 99661 |
| Infection and inflammatory reaction due to other vascular device, implant, and graft | 99662 |
| Infection and inflammatory reaction due to peritoneal dialysis catheter | 99668 |
| Other complications due to heart valve prosthesis | 99671 |
| Other complications due to other cardiac device, implant, and graft | 99672 |
| Other complications due to renal dialysis device, implant, and graft | 99673 |
| Other complications due to other vascular device, implant, and graft | 99674 |
| Complications of transplanted kidney | 99681 |
| Complications of transplanted heart | 99683 |
| Complications of transplanted lung | 99684 |
| Cardiac complications | 9971 |
| Respiratory complications | 9973 |
| Postoperative shock, not elsewhere classified | 9980 |
| Hematoma complication proced | 99812 |
| Accidental puncture or laceration during procedure | 9982 |
| Other postop infection | 99859 |
| Traffic acc nos-pers nos | E8199 |
| Acc cut/hem in surgery | E8700 |
| Abn react-surg proc nec | E8788 |
| Fall from slipping nec | E8859 |
| Fall nec | E8888 |
| Fall nos | E8889 |
| Accident nos | E9289 |
| Antineoplastic and immunosuppressive drugs causing adverse effect in therapeutic use | E9331 |
| Adv eff antilipemics | E9422 |
| Contact/exposure to tb | V011 |
| Personal history of malignant neoplasm of breast | V103 |
| History malignancy bladder | V1051 |
| History other malignancy skin | V1083 |
| History tuberculosis | V1201 |
| Personal history of venous thrombosis and embolism | V1251 |
| Personal history of transient ischemic attack [TIA], and cerebral infarction without residual deficits | V1254 |
| Personal history of other diseases of circulatory system | V1259 |
| History pneumonia | V1261 |
| Personal history of surgery to heart and great vessels, presenting hazards to health | V151 |
| History exposure to asbestos | V1584 |
| History of fall | V1588 |
| Family history of other cardiovascular diseases | V1749 |
| Kidney replaced by transplant | V420 |
| Heart replaced by transplant | V421 |
| Heart valve replaced by transplant | V422 |
| Lung replaced by transplant | V426 |
| Organ or tissue replaced by other means, Heart assist device | V4321 |
| Heart valve replaced by other means | V433 |
| Blood vessel replaced by other means | V434 |
| Unspecified cardiac device in situ | V4500 |
| Cardiac pacemaker in situ | V4501 |
| Automatic implantable cardiac defibrillator in situ | V4502 |
| Other specified cardiac device in situ | V4509 |
| Postprocedural aortocoronary bypass status | V4581 |
| Postprocedural percutaneous transluminal coronary angioplasty status | V4582 |
| Other cardiorespiratory problems | V472 |
| Fitting and adjustment of cardiac pacemaker | V5331 |
| Fitting and adjustment of automatic implantable cardiac defibrillator | V5332 |
| Removal int fixation device | V5401 |
| Encounter for antineoplastic chemotherapy | V5811 |
| Encounter for antineoplastic immunotherapy | V5812 |
| Aftercare following organ transplant | V5844 |
| Encounter for long-term (current) use of other medications | V5869 |
| Encounter for therapeutic drug monitoring | V5883 |
| Chemotherapy follow-up examination | V672 |
| Follow-up examination following completed treatment with high-risk medications, not elsewhere classified | V6751 |
| Observ suspected tb | V712 |
| Observ following oth accident | V714 |
| Observation for suspected cardiovascular disease | V717 |
| Screening for pulmonary tb | V741 |
| Screening mammogram ot | V7612 |
| Special screening mal neo ot | V7649 |
| Screening for defic anemia ot | V781 |

*ICD-9 Codes for Excluding Electrocardiograms*

Electrocardiograms were excluded from the analysis if the associated primary, secondary, tertiary, or quaternary diagnosis involved: (i) proximal fractures; (ii) pulmonary and chest conditions, including anything potentially resulting in chest pain (e.g., chest wall contusion); (iii) esophageal conditions (e.g., esophagitis and esophageal spasm), except those that are painless, mild, and chronic (e.g., esophageal stricture, Barrett’s esophagus, and reflux); (iv) cardiac conditions, including shortness of breath, edema, congestive heart failure and anatomic anomalies; (v) end stage renal disease and dialysis, along with all electrolyte abnormalities; (vi) infections, including sepsis, but not urinary tract infections or pneumonia; (vii) anemia and bleeding conditions, except microscopic hematuria; (viii) abdominal conditions (including abdominal pain), but not benign tumor of the colon; (ix) psychiatric conditions; (x) acute central nervous system conditions (e.g., cerebrovascular accident, delirium) and seizure or epilepsy conditions, but not chronic conditions (e.g., dementia), head ache, or migraine; (xi) drug toxicity and poisoning; (xii) transplants; (xiii) malignant hypertension; (xiv) cancers; (xv) conditions involving arterial and pulmonary emboli, but not peripheral deep vein thrombosis; (xvi) falls; (xvii) autoimmune conditions; or (xviii) pain in the anterior and posterior thorax and shoulder areas (eg. back pain), but not specific shoulder conditions such as “capsular adhesion of shoulder” and “osteoarthrosis of shoulder.”

| **Label** | **Code** |
| --- | --- |
| Salmonella septicemia | 0031 |
| Unspecified food poisoning | 0059 |
| Pulmonary diseases other mycobact | 0310 |
| Disseminated diseases due to other mycobacteria | 0312 |
| Streptococcal septicemia | 0380 |
| Unspecified staphylococcal septicemia | 03810 |
| Methicillin susceptible Staphylococcus aureus septicemia | 03811 |
| Methicillin resistant Staphylococcus aureus septicemia | 03812 |
| Other staphylococcal septicemia | 03819 |
| Pneumococcal septicemia | 0382 |
| Septicemia due to anaerobes | 0383 |
| Septicemia due to unspecified gram-negative organism | 03840 |
| Septicemia due to hemophilus influenzae (H. Influenzae) | 03841 |
| Septicemia due to Escherichia coli (E. Coli) | 03842 |
| Septicemia due to pseudomonas | 03843 |
| Septicemia due to serratia | 03844 |
| Other septicemia due to gram-negative organism | 03849 |
| Other specified septicemia | 0388 |
| Unspecified septicemia | 0389 |
| Gas gangrene | 0400 |
| Mssa infection | 04111 |
| Mrsa infection | 04112 |
| Human immunodeficiency virus [HIV] | 042 |
| Unspecified viral meningitis | 0479 |
| Unspecified non-arthropod-borne viral disease of central nervous system | 0499 |
| Herpetic meningoencephalitis | 0543 |
| West Nile fever with encephalitis | 06641 |
| Chronic hepatitis C with hepatic coma | 07044 |
| Unspecified viral infection | 07999 |
| Lyme disease | 08881 |
| Syphilitic endocarditis, aortic valve | 09322 |
| Candidiasis of lung | 1124 |
| Disseminated candidiasis | 1125 |
| Candidiasis of the esophagus | 11284 |
| Aspergillosis | 1173 |
| Sarcoidosis | 135 |
| Malignant neoplasm of lower lip, vermilion border | 1401 |
| Malignant neoplasm of base of tongue | 1410 |
| Malignant neoplasm of anterior two-thirds of tongue, part unspecified | 1414 |
| Malignant neoplasm of tongue, unspecified site | 1419 |
| Malignant neoplasm of parotid gland | 1420 |
| Malignant neoplasm of floor of mouth, part unspecified | 1449 |
| Malignant neoplasm of mouth, unspecified site | 1459 |
| Malignant neoplasm of tonsil | 1460 |
| Malignant neoplasm of oropharynx, unspecified site | 1469 |
| Malignant neoplasm of nasopharynx, unspecified site | 1479 |
| Malignant neoplasm of thoracic esophagus | 1501 |
| Malignant neoplasm of upper third of esophagus | 1503 |
| Malignant neoplasm of middle third of esophagus | 1504 |
| Malignant neoplasm of lower third of esophagus | 1505 |
| Malignant neoplasm of other specified part of esophagus | 1508 |
| Malignant neoplasm of esophagus, unspecified site | 1509 |
| Malignant neoplasm of cardia | 1510 |
| Malignant neoplasm of pylorus | 1511 |
| Malignant neoplasm of pyloric antrum | 1512 |
| Malignant neoplasm of fundus of stomach | 1513 |
| Malignant neoplasm of body of stomach | 1514 |
| Malignant neoplasm of lesser curvature of stomach, unspecified | 1515 |
| Malignant neoplasm of other specified sites of stomach | 1518 |
| Malignant neoplasm of stomach, unspecified site | 1519 |
| Malignant neoplasm of duodenum | 1520 |
| Malignant neoplasm of ileum | 1522 |
| Malignant neoplasm of small intestine, unspecified site | 1529 |
| Malignant neoplasm of hepatic flexure | 1530 |
| Malignant neoplasm of transverse colon | 1531 |
| Malignant neoplasm of descending colon | 1532 |
| Malignant neoplasm of sigmoid colon | 1533 |
| Malignant neoplasm of cecum | 1534 |
| Malignant neoplasm of appendix | 1535 |
| Malignant neoplasm of ascending colon | 1536 |
| Malignant neoplasm of splenic flexure | 1537 |
| Malignant neoplasm of other specified sites of large intestine | 1538 |
| Malignant neoplasm of colon, unspecified site | 1539 |
| Malignant neoplasm of rectosigmoid junction | 1540 |
| Malignant neoplasm of rectum | 1541 |
| Malignant neoplasm of anal canal | 1542 |
| Malignant neoplasm of anus, unspecified site | 1543 |
| Malignant neoplasm of other sites of rectum, rectosigmoid junction, and anus | 1548 |
| Malignant neoplasm of liver, primary | 1550 |
| Malignant neoplasm of intrahepatic bile ducts | 1551 |
| Malignant neoplasm of liver, not specified as primary or secondary | 1552 |
| Malignant neoplasm of gallbladder | 1560 |
| Malignant neoplasm of extrahepatic bile ducts | 1561 |
| Malignant neoplasm of ampulla of Vater | 1562 |
| Malignant neoplasm of biliary tract, part unspecified site | 1569 |
| Malignant neoplasm of head of pancreas | 1570 |
| Malignant neoplasm of body of pancreas | 1571 |
| Malignant neoplasm of tail of pancreas | 1572 |
| Malignant neoplasm of other specified sites of pancreas | 1578 |
| Malignant neoplasm of pancreas, part unspecified | 1579 |
| Malignant neoplasm of retroperitoneum | 1580 |
| Malignant neoplasm of specified parts of peritoneum | 1588 |
| Malignant neoplasm of peritoneum, unspecified | 1589 |
| Malignant neoplasm of intestinal tract, part unspecified | 1590 |
| Malignant neoplasm of nasal cavities | 1600 |
| Malignant neoplasm of maxillary sinus | 1602 |
| Malignant neoplasm of glottis | 1610 |
| Malignant neoplasm of supraglottis | 1611 |
| Malignant neoplasm of other specified sites of larynx | 1618 |
| Malignant neoplasm of larynx, unspecified site | 1619 |
| Malignant neoplasm of trachea | 1620 |
| Malignant neoplasm of main bronchus | 1622 |
| Malignant neoplasm of upper lobe, bronchus, or lung | 1623 |
| Malignant neoplasm of middle lobe, bronchus, or lung | 1624 |
| Malignant neoplasm of lower lobe, bronchus, or lung | 1625 |
| Malignant neoplasm of other parts of bronchus or lung | 1628 |
| Malignant neoplasm of bronchus and lung, unspecified site | 1629 |
| Malignant neoplasm of other specified sites of pleura | 1638 |
| Malignant neoplasm of pleura, unspecified site | 1639 |
| Malignant neoplasm of thymus | 1640 |
| Malignant neoplasm of heart | 1641 |
| Malignant neoplasm of mediastinum, part unspecified | 1649 |
| Malignant neoplasm of bone and articular cartilage, site unspecified | 1709 |
| Malignant neoplasm of connective and other soft tissue of head, face, and neck | 1710 |
| Malignant neoplasm of connective and other soft tissue of upper limb, including shoulder | 1712 |
| Malignant neoplasm of connective and other soft tissue of lower limb, including hip | 1713 |
| Malignant neoplasm of connective and other soft tissue of thorax | 1714 |
| Malignant neoplasm of connective and other soft tissue of abdomen | 1715 |
| Malignant neoplasm of connective and other soft tissue, site unspecified | 1719 |
| Malignant melanoma of skin of ear and external auditory canal | 1722 |
| Malignant melanoma of skin of other and unspecified parts of face | 1723 |
| Malignant melanoma of skin of scalp and neck | 1724 |
| Malignant melanoma of skin of trunk, except scrotum | 1725 |
| Malignant melanoma of skin of upper limb, including shoulder | 1726 |
| Malignant melanoma of skin of lower limb, including hip | 1727 |
| Malignant melanoma of other specified sites of skin | 1728 |
| Melanoma of skin, site unspecified | 1729 |
| Other malignant neoplasm of skin of lip | 1730 |
| Other malignant neoplasm of skin of eyelid, including canthus | 1731 |
| Other malignant neoplasm of skin of ear and external auditory canal | 1732 |
| Other malignant neoplasm of skin of other and unspecified parts of face | 1733 |
| Other malignant neoplasm of scalp and skin of neck | 1734 |
| Other malignant neoplasm of skin of trunk, except scrotum | 1735 |
| Other malignant neoplasm of skin of upper limb, including shoulder | 1736 |
| Other malignant neoplasm of skin of lower limb, including hip | 1737 |
| Other malignant neoplasm of other specified sites of skin | 1738 |
| Other malignant neoplasm of skin, site unspecified | 1739 |
| Malignant neoplasm of nipple and areola of female breast | 1740 |
| Malignant neoplasm of central portion of female breast | 1741 |
| Malignant neoplasm of upper-inner quadrant of female breast | 1742 |
| Malignant neoplasm of lower-inner quadrant of female breast | 1743 |
| Malignant neoplasm of upper-outer quadrant of female breast | 1744 |
| Malignant neoplasm of lower-outer quadrant of female breast | 1745 |
| Malignant neoplasm of other specified sites of female breast | 1748 |
| Malignant neoplasm of breast (female), unspecified site | 1749 |
| Malignant neoplasm of other and unspecified sites of male breast | 1759 |
| Malignant neoplasm of uterus, part unspecified | 179 |
| Malignant neoplasm of endocervix | 1800 |
| Malignant neoplasm of cervix uteri, unspecified site | 1809 |
| Malignant neoplasm of corpus uteri, except isthmus | 1820 |
| Malignant neoplasm of ovary | 1830 |
| Malignant neoplasm of fallopian tube | 1832 |
| Malignant neoplasm of vagina | 1840 |
| Malignant neoplasm of vulva, unspecified site | 1844 |
| Malignant neoplasm of prostate | 185 |
| Malignant neoplasm of other and unspecified testis | 1869 |
| Malignant neoplasm of penis, part unspecified | 1874 |
| Malignant neoplasm of trigone of urinary bladder | 1880 |
| Malignant neoplasm of dome of urinary bladder | 1881 |
| Malignant neoplasm of lateral wall of urinary bladder | 1882 |
| Malignant neoplasm of anterior wall of urinary bladder | 1883 |
| Malignant neoplasm of posterior wall of urinary bladder | 1884 |
| Malignant neoplasm of bladder neck | 1885 |
| Malignant neoplasm of ureteric orifice | 1886 |
| Malignant neoplasm of other specified sites of bladder | 1888 |
| Malignant neoplasm of bladder, part unspecified | 1889 |
| Malignant neoplasm of kidney, except pelvis | 1890 |
| Malignant neoplasm of renal pelvis | 1891 |
| Malignant neoplasm of ureter | 1892 |
| Malignant neoplasm of urethra | 1893 |
| Malignant neoplasm of urinary organ, site unspecified | 1899 |
| Malignant neoplasm of choroid | 1906 |
| Malignant neoplasm of cerebrum, except lobes and ventricles | 1910 |
| Malignant neoplasm of frontal lobe of brain | 1911 |
| Malignant neoplasm of temporal lobe of brain | 1912 |
| Malignant neoplasm of parietal lobe of brain | 1913 |
| Malignant neoplasm of occipital lobe of brain | 1914 |
| Malignant neoplasm of other parts of brain | 1918 |
| Malignant neoplasm of brain, unspecified site | 1919 |
| Malignant neoplasm of cerebral meninges | 1921 |
| Malignant neoplasm of thyroid gland | 193 |
| Malignant neoplasm of adrenal gland | 1940 |
| Malignant neoplasm of head, face, and neck | 1950 |
| Malignant neoplasm of thorax | 1951 |
| Malignant neoplasm of abdomen | 1952 |
| Secondary and unspecified malignant neoplasm of lymph nodes of head, face, and neck | 1960 |
| Secondary and unspecified malignant neoplasm of intrathoracic lymph nodes | 1961 |
| Secondary and unspecified malignant neoplasm of intra-abdominal lymph nodes | 1962 |
| Secondary and unspecified malignant neoplasm of lymph nodes of axilla and upper limb | 1963 |
| Secondary and unspecified malignant neoplasm of lymph nodes of inguinal region and lower limb | 1965 |
| Secondary malignant neoplasm of lung | 1970 |
| Secondary malignant neoplasm of mediastinum | 1971 |
| Secondary malignant neoplasm of pleura | 1972 |
| Secondary malignant neoplasm of small intestine including duodenum | 1974 |
| Secondary malignant neoplasm of large intestine and rectum | 1975 |
| Secondary malignant neoplasm of retroperitoneum and peritoneum | 1976 |
| Secondary malignant neoplasm of liver | 1977 |
| Secondary malignant neoplasm of other digestive organs and spleen | 1978 |
| Secondary malignant neoplasm of kidney | 1980 |
| Secondary malignant neoplasm of other urinary organs | 1981 |
| Secondary malignant neoplasm of skin | 1982 |
| Secondary malignant neoplasm of brain and spinal cord | 1983 |
| Secondary malignant neoplasm of other parts of nervous system | 1984 |
| Secondary malignant neoplasm of bone and bone marrow | 1985 |
| Secondary malignant neoplasm of adrenal gland | 1987 |
| Secondary malignant neoplasm of breast | 19881 |
| Secondary malignant neoplasm of genital organs | 19882 |
| Secondary malignant neoplasm of other specified sites | 19889 |
| Disseminated malignant neoplasm | 1990 |
| Other malignant neoplasm of unspecified site | 1991 |
| Mantle cell lymphoma, unspecified site, extranodal and solid organ sites | 20040 |
| Large cell lymphoma, unspecified site, extranodal and solid organ sites | 20070 |
| Hodgkin's disease, unspecified type, unspecified site, extranodal and solid organ sites | 20190 |
| Nodular lymphoma, unspecified site, extranodal and solid organ sites | 20200 |
| Nodular lymphoma of lymph nodes of head, face, and neck | 20201 |
| Nodular lymphoma of intra-abdominal lymph nodes | 20203 |
| Nodular lymphoma of lymph nodes of multiple sites | 20208 |
| Mycosis fungoides, unspecified site, extranodal and solid organ sites | 20210 |
| Leukemic reticuloendotheliosis, unspecified site, extranodal and solid organ sites | 20240 |
| Other malignant lymphomas, unspecified site, extranodal and solid organ sites | 20280 |
| Other malignant lymphomas of lymph nodes of head, face, and neck | 20281 |
| Other malignant lymphomas of intrathoracic lymph nodes | 20282 |
| Other malignant lymphomas of intra-abdominal lymph nodes | 20283 |
| Other malignant lymphomas of lymph nodes of axilla and upper limb | 20284 |
| Other malignant lymphomas of lymph nodes of inguinal region and lower limb | 20285 |
| Other malignant lymphomas of lymph nodes of multiple sites | 20288 |
| Multiple myeloma, without mention of having achieved remission | 20300 |
| Multiple myeloma in remission | 20301 |
| Acute lymphoid leukemia, without mention of having achieved remission | 20400 |
| Chronic lymphoid leukemia, without mention of having achieved remission | 20410 |
| Chronic lymphoid leukemia in remission | 20411 |
| Unspecified lymphoid leukemia, without mention of having achieved remission | 20490 |
| Acute myeloid leukemia, without mention of having achieved remission | 20500 |
| Acute myeloid leukemia in remission | 20501 |
| Chronic myeloid leukemia, without mention of having achieved remission | 20510 |
| Acute leukemia of unspecified cell type, without mention of having achieved remission | 20800 |
| Chronic leukemia of unspecified cell type, without mention of having achieved remission | 20810 |
| Unspecified leukemia, without mention of having achieved remission | 20890 |
| Malignant carcinoid tumor of the bronchus and lung | 20921 |
| Benign neoplasm of bronchus and lung | 2123 |
| Benign neoplasm of heart | 2127 |
| Benign neoplasm of brain | 2250 |
| Benign neoplasm of cerebral meninges | 2252 |
| Benign neoplasm of spinal meninges | 2254 |
| Carcinoma in situ of esophagus | 2301 |
| Carcinoma in situ of stomach | 2302 |
| Carcinoma in situ of colon | 2303 |
| Carcinoma in situ of rectum | 2304 |
| Carcinoma in situ of larynx | 2310 |
| Carcinoma in situ of bronchus and lung | 2312 |
| Carcinoma in situ of breast | 2330 |
| Carcinoma in situ of cervix uteri | 2331 |
| Carcinoma in situ of other and unspecified parts of uterus | 2332 |
| Carcinoma in situ, other and unspecified female genital organs | 2333 |
| Carcinoma in situ, vulva | 23332 |
| Carcinoma in situ of prostate | 2334 |
| Carcinoma in situ of bladder | 2337 |
| Carcinoma in situ of other specified sites | 2348 |
| Neoplasm of uncertain behavior of major salivary glands | 2350 |
| Neoplasm of uncertain behavior of lip, oral cavity, and pharynx | 2351 |
| Neoplasm of uncertain behavior of stomach, intestines, and rectum | 2352 |
| Neoplasm of uncertain behavior of liver and biliary passages | 2353 |
| Neoplasm of uncertain behavior of other and unspecified digestive organs | 2355 |
| Neoplasm of uncertain behavior of larynx | 2356 |
| Neoplasm of uncertain behavior of trachea, bronchus, and lung | 2357 |
| Neoplasm of uncertain behavior of ovary | 2362 |
| Neoplasm of uncertain behavior of prostate | 2365 |
| Neoplasm of uncertain behavior of bladder | 2367 |
| Neoplasm of uncertain behavior of kidney and ureter | 23691 |
| Neoplasm of uncertain behavior of pituitary gland and craniopharyngeal duct | 2370 |
| Neoplasm of uncertain behavior of other and unspecified endocrine glands | 2374 |
| Neoplasm of uncertain behavior of brain and spinal cord | 2375 |
| Neoplasm of uncertain behavior of bone and articular cartilage | 2380 |
| Neoplasm of uncertain behavior of connective and other soft tissue | 2381 |
| Neoplasm of uncertain behavior of skin | 2382 |
| Neoplasm of uncertain behavior of breast | 2383 |
| Neoplasm of uncertain behavior of polycythemia vera | 2384 |
| Essential thrombocythemia | 23871 |
| Low grade myelodysplastic syndrome lesions | 23872 |
| High grade myelodysplastic syndrome lesions | 23873 |
| Myelodysplastic syndrome, unspecified | 23875 |
| Myelofibrosis with myeloid metaplasia | 23876 |
| Neoplasm of uncertain behavior of other specified sites | 2388 |
| Neoplasm of uncertain behavior, site unspecified | 2389 |
| Neoplasm of unspecified nature of digestive system | 2390 |
| Neoplasm of unspecified nature of respiratory system | 2391 |
| Neoplasms of unspecified nature of bone, soft tissue, and skin | 2392 |
| Neoplasm of unspecified nature of breast | 2393 |
| Neoplasm of unspecified nature of bladder | 2394 |
| Neoplasm of unspecified nature of other genitourinary organs | 2395 |
| Neoplasm of unspecified nature of brain | 2396 |
| Neoplasm of unspecified nature of endocrine glands and other parts of nervous system | 2397 |
| Neoplasm of unspecified nature of other specified sites | 2398 |
| Neoplasms of unspecified nature, other specified sites | 23989 |
| Neoplasm of unspecified nature, site unspecified | 2399 |
| Thyrotoxicosis of other specified origin without mention of thyrotoxic crisis or storm | 24280 |
| Thyrotoxicosis without mention of goiter or other cause, without mention of thyrotoxic crisis or storm | 24290 |
| Thyrotoxicosis without mention of goiter or other cause, with mention of thyrotoxic crisis | 24291 |
| Acute thyroiditis | 2450 |
| Unspecified thyroiditis | 2459 |
| Diabetes with ketoacidosis, type II or unspecified type, not stated as uncontrolled | 25010 |
| Diabetes with ketoacidosis, type I [juvenile type], not stated as uncontrolled | 25011 |
| Diabetes with ketoacidosis, type II or unspecified type, uncontrolled | 25012 |
| Diabetes with ketoacidosis, type I [juvenile type], uncontrolled | 25013 |
| Diabetes with hyperosmolarity, type II or unspecified type, not stated as uncontrolled | 25020 |
| Diabetes with hyperosmolarity, type II or unspecified type, uncontrolled | 25022 |
| Diabetes with other coma, type II or unspecified type, not stated as uncontrolled | 25030 |
| Diabetes with other coma, type II or unspecified type, uncontrolled | 25032 |
| Diabetes with other coma, type I [juvenile type], uncontrolled | 25033 |
| Hypoglycemic coma | 2510 |
| Other specified hypoglycemia | 2511 |
| Hypoglycemia, unspecified | 2512 |
| Diabetes insipidus | 2535 |
| Glucocorticoid deficiency | 25541 |
| Carcinoid syndrome | 2592 |
| Nutritional marasmus | 261 |
| Other severe protein-calorie malnutrition | 262 |
| Unspecified protein-calorie malnutrition | 2639 |
| Other and unspecified manifestations of thiamine deficiency | 2651 |
| Disturb sulphur amino acid metabol | 2704 |
| Monoclonal paraproteinemia | 2731 |
| Disorders of iron metabolism | 2750 |
| Disorders of magnesium metabolism | 2752 |
| Disorders of phosphorus metabolism | 2753 |
| Unspecified disorder of calcium metabolism | 27540 |
| Hypocalcemia | 27541 |
| Hypercalcemia | 27542 |
| Other disorders of calcium metabolism | 27549 |
| Hyperosmolality and/or hypernatremia | 2760 |
| Hyposmolality and/or hyponatremia | 2761 |
| Acidosis | 2762 |
| Alkalosis | 2763 |
| Mixed acid-base balance disorder | 2764 |
| Volume depletion, unspecified | 27650 |
| Dehydration | 27651 |
| Hypovolemia | 27652 |
| Fluid overload | 2766 |
| Fluid overload nec (other fluid overload) | 27669 |
| Hyperpotassemia | 2767 |
| Hypopotassemia | 2768 |
| Electrolyte and fluid disorders not elsewhere classified | 2769 |
| Cystic fibrosis without mention of meconium ileus | 27700 |
| Cystic fibrosis with pulmonary manifestations | 27702 |
| Amyloidosis | 2773 |
| Amyloidosis, unspecified | 27730 |
| Other amyloidosis | 27739 |
| Unspecified disorder of metabolism | 2779 |
| Autoimmune disease other | 2794 |
| Iron deficiency anemia secondary to blood loss (chronic) | 2800 |
| Iron deficiency anemia secondary to inadequate dietary iron intake | 2801 |
| Other specified iron deficiency anemias | 2808 |
| Unspecified iron deficiency anemia | 2809 |
| Pernicious anemia | 2810 |
| Other vitamin B12 deficiency anemia | 2811 |
| Folate-deficiency anemia | 2812 |
| Other specified megaloblastic anemias not elsewhere classified | 2813 |
| Anemia associated with other specified nutritional deficiency | 2818 |
| Unspecified deficiency anemia | 2819 |
| Other thalassemia | 28249 |
| Sickle-cell disease, unspecified | 28260 |
| Hb-SS disease with crisis | 28262 |
| Sickle-cell/Hb-C disease with crisis | 28264 |
| Other sickle-cell disease with crisis | 28269 |
| Autoimmune hemolytic anemias | 2830 |
| Other non-autoimmune hemolytic anemias | 28319 |
| Acquired hemolytic anemia, unspecified | 2839 |
| Pancytopenia | 2841 |
| Other pancytopenia | 28419 |
| Other specified aplastic anemias | 2848 |
| Red cell aplasia (acquired) (adult) (with thymoma) | 28481 |
| Other specified aplastic anemias | 28489 |
| Unspecified aplastic anemia | 2849 |
| Sideroblastic anemia | 2850 |
| Acute posthemorrhagic anemia | 2851 |
| Anemia in chronic kidney disease | 28521 |
| Anemia in neoplastic disease | 28522 |
| Anemia of other chronic disease | 28529 |
| Chemotherapy induced anemia | 2853 |
| Other specified anemias | 2858 |
| Unspecified anemia | 2859 |
| Hemorrhagic disorder due to intrinsic circulating anticoagulants | 2865 |
| Defibrination syndrome | 2866 |
| Oth nonthrombocytopenic purpuras | 2872 |
| Primary thrombocytopenia unspec | 28730 |
| Immune thrombocytopenic purpura | 28731 |
| Uns thrombocytopenia | 2875 |
| Unspecified hemorrhagic conditions | 2879 |
| Neutropenia, unspecified | 28800 |
| Functional disord neutrophils | 2881 |
| Leukocytopenia unspecified | 28850 |
| Leukocytosis unspecified | 28860 |
| Other disease white blood cells | 2888 |
| Polycythemia, secondary | 2890 |
| Myelofibrosis | 28983 |
| Ot dis blood/blood forming organs | 28989 |
| Uns dis blood/blood forming organs | 2899 |
| Senile dementia with delirium | 2903 |
| Vascular dementia, with delirium | 29041 |
| Unspecified senile psychotic condition | 2909 |
| Alcohol withdrawal delirium | 2910 |
| Alcohol withdrawal | 29181 |
| Drug withdrawal | 2920 |
| Drug-induced psychotic disorder with hallucinations | 29212 |
| Drug-induced delirium | 29281 |
| Drug-induced mood disorder | 29284 |
| Other specified drug-induced mental disorder | 29289 |
| Unspecified drug-induced mental disorder | 2929 |
| Delirium due to conditions classified elsewhere | 2930 |
| Subacute delirium | 2931 |
| Mood disorder in conditions classified elsewhere | 29383 |
| Anxiety disorder in conditions classified elsewhere | 29384 |
| Unspecified transient mental disorder in conditions classified elsewhere | 2939 |
| Other persistent mental disorders due to conditions classified elsewhere | 2948 |
| Unspecified persistent mental disorders due to conditions classified elsewhere | 2949 |
| Simple schizophrenia, unspecified condition | 29500 |
| Catatonic schizophrenia, unspecified condition | 29520 |
| Paranoid schizophrenia, unspecified condition | 29530 |
| Paranoid schizophrenia, chronic condition | 29532 |
| Paranoid schizophrenia, chronic condition with acute exacerbation | 29534 |
| Schizophreniform disorder, unspecified | 29540 |
| Schizophrenic disorders, residual type, unspecified | 29560 |
| Schizoaffective disorder, unspecified | 29570 |
| Schizoaffective disorder, chronic | 29572 |
| Schizoaffective disorder, chronic with acute exacerbation | 29574 |
| Other specified types of schizophrenia, unspecified condition | 29580 |
| Other specified types of schizophrenia, chronic condition with acute exacerbation | 29584 |
| Unspecified schizophrenia, unspecified condition | 29590 |
| Unspecified schizophrenia, chronic condition | 29592 |
| Unspecified schizophrenia, chronic condition with acute exacerbation | 29594 |
| Bipolar I disorder, single manic episode, unspecified | 29600 |
| Major depressive disorder, single episode, unspecified | 29620 |
| Major depressive disorder, single episode, mild | 29621 |
| Major depressive disorder, single episode, moderate | 29622 |
| Major depressive disorder, single episode, severe, without mention of psychotic behavior | 29623 |
| Major depressive disorder, single episode, severe, specified as with psychotic behavior | 29624 |
| Major depressive disorder, recurrent episode, unspecified | 29630 |
| Major depressive disorder, recurrent episode, mild | 29631 |
| Major depressive disorder, recurrent episode, moderate | 29632 |
| Major depressive disorder, recurrent episode, severe, without mention of psychotic behavior | 29633 |
| Major depressive disorder, recurrent episode, severe, specified as with psychotic behavior | 29634 |
| Bipolar I disorder, most recent episode (or current) manic, unspecified | 29640 |
| Bipolar I disorder, most recent episode (or current) manic, severe, without mention of psychotic behavior | 29643 |
| Bipolar I disorder, most recent episode (or current) manic, severe, specified as with psychotic behavior | 29644 |
| Bipolar I disorder, most recent episode (or current) depressed, unspecified | 29650 |
| Bipolar I disorder, most recent episode (or current) depressed, moderate | 29652 |
| Bipolar I disorder, most recent episode (or current) depressed, severe, without mention of psychotic behavior | 29653 |
| Bipolar I disorder, most recent episode (or current) depressed, severe, specified as with psychotic behavior | 29654 |
| Bipolar I disorder, most recent episode (or current) mixed, unspecified | 29660 |
| Bipolar I disorder, most recent episode (or current) mixed, moderate | 29662 |
| Bipolar I disorder, most recent episode (or current) mixed, severe, without mention of psychotic behavior | 29663 |
| Bipolar I disorder, most recent episode (or current) mixed, severe, specified as with psychotic behavior | 29664 |
| Bipolar I disorder, most recent episode (or current) unspecified | 2967 |
| Bipolar disorder, unspecified | 29680 |
| Atypical depressive disorder | 29682 |
| Unspecified episodic mood disorder | 29690 |
| Other specified episodic mood disorder | 29699 |
| Delusional disorder | 2971 |
| Unspecified paranoid state | 2979 |
| Reactive confusion | 2982 |
| Other and unspecified reactive psychosis | 2988 |
| Unspecified psychosis | 2989 |
| Autistic disorder, current or active state | 29900 |
| Anxiety state, unspecified | 30000 |
| Panic disorder wo agoraphobia | 30001 |
| Generalized anxiety disorder | 30002 |
| Other anxiety states | 30009 |
| Conversion disorder | 30011 |
| Obsessive-compulsive disorders | 3003 |
| Dysthymic disorder | 3004 |
| Unspecified nonpsychotic mental disorder | 3009 |
| Borderline personality disorder | 30183 |
| Psychosex dysfunc inhibited excite | 30272 |
| Acute alcoholic intoxication, unspecified drunkenness | 30300 |
| Acute alcoholic intoxication, continuous drunkenness | 30301 |
| Acute alcoholic intoxication, episodic drunkenness | 30302 |
| Other and unspecified alcohol dependence, unspecified drunkenness | 30390 |
| Other and unspecified alcohol dependence, continuous drunkenness | 30391 |
| Opioid type dependence, unspecified abuse | 30400 |
| Opioid type dependence, continuous abuse | 30401 |
| Cocaine dependence, unspecified abuse | 30420 |
| Cocaine dependence, continuous abuse | 30421 |
| Combinations of opioid type drug with any other drug dependence, continuous abuse | 30471 |
| Combinations of drug dependence excluding opioid type drug, unspecified abuse | 30480 |
| Unspecified drug dependence, unspecified abuse | 30490 |
| Nondependent alcohol abuse, unspecified drunkenness | 30500 |
| Nondependent alcohol abuse, continuous drunkenness | 30501 |
| Nondependent alcohol abuse, episodic drunkenness | 30502 |
| Nondependent cannabis abuse, unspecified | 30520 |
| Nondependent sedative, hypnotic or anxiolytic abuse, unspecified | 30540 |
| Nondependent opioid abuse, unspecified | 30550 |
| Nondependent cocaine abuse, unspecified | 30560 |
| Nondependent amphetamine or related acting sympathomimetic abuse, unspecified | 30570 |
| Other, mixed, or unspecified nondependent drug abuse, unspecified | 30590 |
| Respiratory malfunction arising from mental factors | 3061 |
| Cardiovascular malfunction arising from mental factors | 3062 |
| Anorexia nervosa | 3071 |
| Eating disorder, unspecified | 30750 |
| Predominant disturbance of emotions | 3080 |
| Unspecified acute reaction to stress | 3089 |
| Adjustment disorder with depressed mood | 3090 |
| Prolonged depressive reaction as adjustment reaction | 3091 |
| Adjustment disorder with anxiety | 30924 |
| Adjustment disorder with mixed anxiety and depressed mood | 30928 |
| Adjustment disorder with mixed disturbance of emotions and conduct | 3094 |
| Posttraumatic stress disorder | 30981 |
| Unspecified adjustment reaction | 3099 |
| Personality change due to conditions classified elsewhere | 3101 |
| Postconcussion syndrome | 3102 |
| Unspecified nonpsychotic mental disorder following organic brain damage | 3109 |
| Depressive disorder, not elsewhere classified | 311 |
| Impulse control disorder, unspecified | 31230 |
| Intermittent explosive disorder | 31234 |
| Attention deficit disorder of childhood without mention of hyperactivity | 31400 |
| Attention deficit disorder of childhood with hyperactivity | 31401 |
| Meningitis due to unspecified bacterium | 3209 |
| Unspecified meningitis | 3229 |
| Unspecified causes of encephalitis, myelitis, and encephalomyelitis | 3239 |
| Intracranial abscess | 3240 |
| Idiopathic sleep related nonobstructive alveolar hypoventilation | 32724 |
| Confusional arousals | 32741 |
| Communicating hydrocephalus | 3313 |
| Obstructive hydrocephalus | 3314 |
| Idiopathic normal pressure hydrocephalus [INPH] | 3315 |
| Paralysis agitans | 3320 |
| Secondary parkinsonism | 3321 |
| Subacute dyskinesia due to drugs | 33385 |
| Neuroleptic malignant syndrome | 33392 |
| Carotid sinus syndrome | 33701 |
| Acute pain due to trauma | 33811 |
| Acute post-thoracotomy pain | 33812 |
| Other acute postoperative pain | 33818 |
| Other acute pain | 33819 |
| Neoplasm related pain (acute) (chronic) | 3383 |
| Multiple sclerosis | 340 |
| Unspecified infantile cerebral palsy | 3439 |
| Other specified paralytic syndrome | 34489 |
| Unspecified paralysis | 3449 |
| Other forms of epilepsy and recurrent seizures, without mention of intractable epilepsy | 34580 |
| Migraine with aura, without mention of intractable migraine without mention of status migrainosus | 34600 |
| Migraine with aura, with intractable migraine, so stated, without mention of status migrainosus | 34601 |
| Migraine without aura, without mention of intractable migraine without mention of status migrainosus | 34610 |
| Migraine without aura, with intractable migraine, so stated, without mention of status migrainosus | 34611 |
| Variants of migraine, not elsewhere classified, without mention of intractable migraine without mention of status migrainosus | 34620 |
| Variants of migraine, not elsewhere classified, with intractable migraine, so stated, without mention of status migrainosus | 34621 |
| Chronic migraine without aura, with intractable migraine, so stated, without mention of status migrainosus | 34671 |
| Other forms of migraine, without mention of intractable migraine without mention of status migrainosus | 34680 |
| Migraine, unspecified with intractable migraine, so stated, without mention of status migrainosus | 34691 |
| Narcolepsy, without cataplexy | 34700 |
| Anoxic brain damage | 3481 |
| Benign intracranial hypertension | 3482 |
| Encephalopathy, unspecified | 34830 |
| Metabolic encephalopathy | 34831 |
| Other encephalopathy | 34839 |
| Cerebral edema | 3485 |
| Toxic encephalopathy | 34982 |
| Atypical face pain | 3502 |
| Unspecified inflammatory and toxic neuropathy | 3579 |
| Myasthenia gravis without (acute) exacerbation | 35800 |
| Myasthenia gravis with (acute) exacerbation | 35801 |
| Myotonic muscular dystrophy | 35921 |
| Toxic myopathy | 3594 |
| Unspecified retinal vascular occlusion | 36230 |
| Central artery occlusion of retina | 36231 |
| Arterial branch occlusion of retina | 36232 |
| Partial arterial occlusion of retina | 36233 |
| Transient arterial occlusion of retina | 36234 |
| Central vein occlusion of retina | 36235 |
| Sudden visual loss | 36811 |
| Transient visual loss | 36812 |
| Psychophysical visual disturbances | 36816 |
| Other visual disturbances | 3688 |
| Unspecified visual disturbance | 3689 |
| Impairment level not further specified | 36960 |
| Unspecified visual loss | 3699 |
| Uns peripheral vertigo | 38610 |
| Benign paroxysmal position vertigo | 38611 |
| Rheumatic fever without mention of heart involvement | 390 |
| Acute rheumatic pericarditis | 3910 |
| Acute rheumatic endocarditis | 3911 |
| Other acute rheumatic heart disease | 3918 |
| Unspecified acute rheumatic heart disease | 3919 |
| Mitral stenosis | 3940 |
| Rheumatic mitral insufficiency | 3941 |
| Mitral stenosis with insufficiency | 3942 |
| Other and unspecified mitral valve diseases | 3949 |
| Rheumatic aortic stenosis | 3950 |
| Rheumatic aortic insufficiency | 3951 |
| Rheumatic aortic stenosis with insufficiency | 3952 |
| Other and unspecified rheumatic aortic diseases | 3959 |
| Mitral valve stenosis and aortic valve stenosis | 3960 |
| Mitral valve stenosis and aortic valve insufficiency | 3961 |
| Mitral valve insufficiency and aortic valve stenosis | 3962 |
| Mitral valve insufficiency and aortic valve insufficiency | 3963 |
| Multiple involvement of mitral and aortic valves | 3968 |
| Unspecified mitral and aortic valve diseases | 3969 |
| Diseases of tricuspid valve | 3970 |
| Rheumatic diseases of pulmonary valve | 3971 |
| Unspecified rheumatic heart disease | 39890 |
| Rheumatic heart failure (congestive) | 39891 |
| Other and unspecified rheumatic heart diseases | 39899 |
| Essential hypertension, malignant | 4010 |
| Malignant hypertensive heart disease without heart failure | 40200 |
| Malignant hypertensive heart disease with heart failure | 40201 |
| Benign hypertensive heart disease without heart failure | 40210 |
| Benign hypertensive heart disease with heart failure | 40211 |
| Unspecified hypertensive heart disease without heart failure | 40290 |
| Hypertensive heart disease, unspecified, with heart failure | 40291 |
| Mal kid hyper w ckd stage i-iv | 40300 |
| Hypertensive heart and chronic kidney disease, malignant, without heart failure and with chronic kidney disease stage I-IV | 40400 |
| Hypertensive heart and chronic kidney disease, malignant, with heart failure and with chronic kidney disease stage I-IV | 40401 |
| Hypertensive heart and chronic kidney disease, malignant, without heart failure and with chronic kidney disease stage V | 40402 |
| Hypertensive heart and chronic kidney disease, malignant, with heart failure and with chronic kidney disease stage V | 40403 |
| Hypertensive heart and chronic kidney disease, benign, without heart failure and with chronic kidney disease stage I-IV | 40410 |
| Hypertensive heart and chronic kidney disease, benign, with heart failure and with chronic kidney disease stage I-IV | 40411 |
| Hypertensive heart and chronic kidney disease, benign, without heart failure and with chronic kidney disease stage V | 40412 |
| Hypertensive heart and chronic kidney disease, benign, with heart failure and with chronic kidney disease stage V | 40413 |
| Hypertensive heart and chronic kidney disease, unspecified, without heart failure and with chronic kidney disease stage I-IV | 40490 |
| Hypertensive heart and chronic kidney disease, unspecified, with heart failure and with chronic kidney disease stage I-IV | 40491 |
| Hypertensive heart and chronic kidney disease, unspecified, without heart failure and with chronic kidney disease stage V | 40492 |
| Hypertensive heart and chronic kidney disease, unspecified, with heart failure and with chronic kidney disease stage V | 40493 |
| Secondary renovascular hypertension, malignant | 40501 |
| Other secondary hypertension, malignant | 40509 |
| Acute myocardial infarction of anterolateral wall, episode of care unspecified | 41000 |
| Acute myocardial infarction of anterolateral wall, initial episode of care | 41001 |
| Acute myocardial infarction of anterolateral wall, subsequent episode of care | 41002 |
| Acute myocardial infarction of other anterior wall, episode of care unspecified | 41010 |
| Acute myocardial infarction of other anterior wall, initial episode of care | 41011 |
| Acute myocardial infarction of other anterior wall, subsequent episode of care | 41012 |
| Acute myocardial infarction of inferolateral wall, episode of care unspecified | 41020 |
| Acute myocardial infarction of inferolateral wall, initial episode of care | 41021 |
| Acute myocardial infarction of inferolateral wall, subsequent episode of care | 41022 |
| Acute myocardial infarction of inferoposterior wall, episode of care unspecified | 41030 |
| Acute myocardial infarction of inferoposterior wall, initial episode of care | 41031 |
| Acute myocardial infarction of inferoposterior wall, subsequent episode of care | 41032 |
| Acute myocardial infarction of other inferior wall, episode of care unspecified | 41040 |
| Acute myocardial infarction of other inferior wall, initial episode of care | 41041 |
| Acute myocardial infarction of other inferior wall, subsequent episode of care | 41042 |
| Acute myocardial infarction of other lateral wall, episode of care unspecified | 41050 |
| Acute myocardial infarction of other lateral wall, initial episode of care | 41051 |
| Acute myocardial infarction of other lateral wall, subsequent episode of care | 41052 |
| Acute myocardial infarction, true posterior wall infarction, episode of care unspecified | 41060 |
| Acute myocardial infarction, true posterior wall infarction, initial episode of care | 41061 |
| Acute myocardial infarction, true posterior wall infarction, subsequent episode of care | 41062 |
| Acute myocardial infarction, subendocardial infarction, episode of care unspecified | 41070 |
| Acute myocardial infarction, subendocardial infarction, initial episode of care | 41071 |
| Acute myocardial infarction, subendocardial infarction, subsequent episode of care | 41072 |
| Acute myocardial infarction of other specified sites, episode of care unspecified | 41080 |
| Acute myocardial infarction of other specified sites, initial episode of care | 41081 |
| Acute myocardial infarction of other specified sites, subsequent episode of care | 41082 |
| Acute myocardial infarction, unspecified site, episode of care unspecified | 41090 |
| Acute myocardial infarction, unspecified site, initial episode of care | 41091 |
| Acute myocardial infarction, unspecified site, subsequent episode of care | 41092 |
| Postmyocardial infarction syndrome | 4110 |
| Intermediate coronary syndrome | 4111 |
| Acute coronary occlusion without myocardial infarction | 41181 |
| Other acute and subacute form of ischemic heart disease | 41189 |
| Old myocardial infarction | 412 |
| Angina decubitus | 4130 |
| Prinzmetal angina | 4131 |
| Other and unspecified angina pectoris | 4139 |
| Coronary atherosclerosis of unspecified type of vessel, native or graft | 41400 |
| Coronary atherosclerosis of native coronary artery | 41401 |
| Coronary atherosclerosis of autologous vein bypass graft | 41402 |
| Coronary atherosclerosis of nonautologous biological bypass graft | 41403 |
| Coronary atherosclerosis of artery bypass graft | 41404 |
| Coronary atherosclerosis of unspecified type of bypass graft | 41405 |
| Coronary atherosclerosis, of native coronary artery of transplanted heart | 41406 |
| Coronary atherosclerosis, of bypass graft (artery) (vein) of transplanted heart | 41407 |
| Aneurysm of heart | 41410 |
| Aneurysm of coronary vessels | 41411 |
| Dissection of coronary artery | 41412 |
| Other aneurysm of heart | 41419 |
| Chronic total occlusion of coronary artery | 4142 |
| Coronary atherosclerosis due to lipid rich plaque | 4143 |
| Other specified forms of chronic ischemic heart disease | 4148 |
| Unspecified chronic ischemic heart disease | 4149 |
| Acute cor pulmonale | 4150 |
| Iatrogenic pulmonary embolism and infarction | 41511 |
| Septic pulmonary embolism | 41512 |
| Other pulmonary embolism and infarction | 41519 |
| Primary pulmonary hypertension | 4160 |
| Chronic pulmonary embolism | 4162 |
| Other chronic pulmonary heart diseases | 4168 |
| Unspecified chronic pulmonary heart disease | 4169 |
| Arteriovenous fistula of pulmonary vessels | 4170 |
| Aneurysm of pulmonary artery | 4171 |
| Other specified disease of pulmonary circulation | 4178 |
| Unspecified disease of pulmonary circulation | 4179 |
| Acute pericarditis in diseases classified elsewhere | 4200 |
| Unspecified acute pericarditis | 42090 |
| Acute idiopathic pericarditis | 42091 |
| Other acute pericarditis | 42099 |
| Acute and subacute bacterial endocarditis | 4210 |
| Acute and subacute infective endocarditis in diseases classified elsewhere | 4211 |
| Unspecified acute endocarditis | 4219 |
| Unspecified acute myocarditis | 42290 |
| Idiopathic myocarditis | 42291 |
| Hemopericardium | 4230 |
| Adhesive pericarditis | 4231 |
| Constrictive pericarditis | 4232 |
| Cardiac tamponade | 4233 |
| Other specified diseases of pericardium | 4238 |
| Unspecified disease of pericardium | 4239 |
| Mitral valve disorders | 4240 |
| Aortic valve disorders | 4241 |
| Tricuspid valve disorders, specified as nonrheumatic | 4242 |
| Pulmonary valve disorders | 4243 |
| Endocarditis, valve unspecified, unspecified cause | 42490 |
| Endocarditis in diseases classified elsewhere | 42491 |
| Other endocarditis, valve unspecified | 42499 |
| Endomyocardial fibrosis | 4250 |
| Hypertrophic obstructive cardiomyopathy | 4251 |
| Hypertrophic obstructive cardiomyopathy | 42511 |
| Other hypertrophic cardiomyopathy | 42518 |
| Obscure cardiomyopathy of Africa | 4252 |
| Endocardial fibroelastosis | 4253 |
| Other primary cardiomyopathies | 4254 |
| Alcoholic cardiomyopathy | 4255 |
| Nutritional and metabolic cardiomyopathy | 4257 |
| Cardiomyopathy in other diseases classified elsewhere | 4258 |
| Unspecified secondary cardiomyopathy | 4259 |
| Atrioventricular block, complete | 4260 |
| Unspecified atrioventricular block | 42610 |
| First degree atrioventricular block | 42611 |
| Mobitz (type) II atrioventricular block | 42612 |
| Other second degree atrioventricular block | 42613 |
| Left bundle branch hemiblock | 4262 |
| Other left bundle branch block | 4263 |
| Right bundle branch block | 4264 |
| Unspecified bundle branch block | 42650 |
| Right bundle branch block and left posterior fascicular block | 42651 |
| Right bundle branch block and left anterior fascicular block | 42652 |
| Other bilateral bundle branch block | 42653 |
| Trifascicular block | 42654 |
| Other heart block | 4266 |
| Anomalous atrioventricular excitation | 4267 |
| Lown-Ganong-Levine syndrome | 42681 |
| Long QT syndrome | 42682 |
| Other specified conduction disorder | 42689 |
| Unspecified conduction disorder | 4269 |
| Paroxysmal supraventricular tachycardia | 4270 |
| Paroxysmal ventricular tachycardia | 4271 |
| Unspecified paroxysmal tachycardia | 4272 |
| Atrial fibrillation | 42731 |
| Atrial flutter | 42732 |
| Ventricular fibrillation | 42741 |
| Ventricular flutter | 42742 |
| Cardiac arrest | 4275 |
| Unspecified premature beats | 42760 |
| Supraventricular premature beats | 42761 |
| Other premature beats | 42769 |
| Sinoatrial node dysfunction | 42781 |
| Other specified cardiac dysrhythmias | 42789 |
| Unspecified cardiac dysrhythmia | 4279 |
| Congestive heart failure, unspecified | 4280 |
| Left heart failure | 4281 |
| Unspecified systolic heart failure | 42820 |
| Acute systolic heart failure | 42821 |
| Chronic systolic heart failure | 42822 |
| Acute on chronic systolic heart failure | 42823 |
| Unspecified diastolic heart failure | 42830 |
| Acute diastolic heart failure | 42831 |
| Chronic diastolic heart failure | 42832 |
| Acute on chronic diastolic heart failure | 42833 |
| Unspecified combined systolic and diastolic heart failure | 42840 |
| Acute combined systolic and diastolic heart failure | 42841 |
| Chronic combined systolic and diastolic heart failure | 42842 |
| Acute on chronic combined systolic and diastolic heart failure | 42843 |
| Unspecified heart failure | 4289 |
| Unspecified myocarditis | 4290 |
| Myocardial degeneration | 4291 |
| Unspecified cardiovascular disease | 4292 |
| Cardiomegaly | 4293 |
| Functional disturbances following cardiac surgery | 4294 |
| Rupture of chordae tendineae | 4295 |
| Rupture of papillary muscle | 4296 |
| Acquired cardiac septal defect | 42971 |
| Other certain sequelae of myocardial infarction, not elsewhere classified | 42979 |
| Other disorders of papillary muscle | 42981 |
| Hyperkinetic heart disease | 42982 |
| Takotsubo syndrome | 42983 |
| Other ill-defined heart disease | 42989 |
| Unspecified heart disease | 4299 |
| Subarachnoid hemorrhage | 430 |
| Intracerebral hemorrhage | 431 |
| Nontraumatic extradural hemorrhage | 4320 |
| Subdural hemorrhage | 4321 |
| Unspecified intracranial hemorrhage | 4329 |
| Occlusion and stenosis of basilar artery without mention of cerebral infarction | 43300 |
| Occlusion and stenosis of basilar artery with cerebral infarction | 43301 |
| Occlusion and stenosis of carotid artery without mention of cerebral infarction | 43310 |
| Occlusion and stenosis of carotid artery with cerebral infarction | 43311 |
| Occlusion and stenosis of vertebral artery without mention of cerebral infarction | 43320 |
| Occlusion and stenosis of vertebral artery with cerebral infarction | 43321 |
| Occlusion and stenosis of multiple and bilateral precerebral arteries without mention of c | 43330 |
| Occlusion and stenosis of multiple and bilateral precerebral arteries with cerebral infarc | 43331 |
| Occlusion and stenosis of other specified precerebral artery without mention of cerebral i | 43380 |
| Occlusion and stenosis of other specified precerebral artery with cerebral infarction | 43381 |
| Occlusion and stenosis of unspecified precerebral artery without mention of cerebral infar | 43390 |
| Occlusion and stenosis of unspecified precerebral artery with cerebral infarction | 43391 |
| Cerebral thrombosis without mention of cerebral infarction | 43400 |
| Cerebral thrombosis with cerebral infarction | 43401 |
| Cerebral embolism without mention of cerebral infarction | 43410 |
| Cerebral embolism with cerebral infarction | 43411 |
| Unspecified cerebral artery occlusion without mention of cerebral infarction | 43490 |
| Unspecified cerebral artery occlusion with cerebral infarction | 43491 |
| Basilar artery syndrome | 4350 |
| Vertebral artery syndrome | 4351 |
| Subclavian steal syndrome | 4352 |
| Vertebrobasilar artery syndrome | 4353 |
| Other specified transient cerebral ischemias | 4358 |
| Unspecified transient cerebral ischemia | 4359 |
| Acute, but ill-defined, cerebrovascular disease | 436 |
| Cerebral atherosclerosis | 4370 |
| Other generalized ischemic cerebrovascular disease | 4371 |
| Hypertensive encephalopathy | 4372 |
| Cerebral aneurysm, nonruptured | 4373 |
| Transient global amnesia | 4377 |
| Unspecified cerebrovascular disease | 4379 |
| Hemiplegia affecting unspecified side due to cerebrovascular disease | 43820 |
| Vertigo | 43885 |
| Uns late effects cv disease | 4389 |
| Atherosclerosis of aorta | 4400 |
| Atherosclerosis of renal artery | 4401 |
| Atherosclerosis of native arteries of the extremities, unspecified | 44020 |
| Atherosclerosis of native arteries of the extremities with intermittent claudication | 44021 |
| Atherosclerosis of native arteries of the extremities with rest pain | 44022 |
| Atherosclerosis of native arteries of the extremities with ulceration | 44023 |
| Atherosclerosis of native arteries of the extremities with gangrene | 44024 |
| Other atherosclerosis of native arteries of the extremities | 44029 |
| Atherosclerosis of unspecified bypass graft of extremities | 44030 |
| Atherosclerosis of autologous vein bypass graft of extremities | 44031 |
| Chronic total occlusion of artery of the extremities | 4404 |
| Atherosclerosis of other specified arteries | 4408 |
| Generalized and unspecified atherosclerosis | 4409 |
| Dissecting aortic aneurysm (any part), unspecified site | 44100 |
| Dissecting aortic aneurysm (any part), thoracic | 44101 |
| Dissecting aortic aneurysm (any part), abdominal | 44102 |
| Dissecting aortic aneurysm (any part), thoracoabdominal | 44103 |
| Thoracic aneurysm, ruptured | 4411 |
| Thoracic aneurysm without mention of rupture | 4412 |
| Abdominal aneurysm, ruptured | 4413 |
| Abdominal aneurysm without mention of rupture | 4414 |
| Aortic aneurysm of unspecified site, ruptured | 4415 |
| Thoracoabdominal aneurysm, ruptured | 4416 |
| Thoracoabdominal aneurysm without mention of rupture | 4417 |
| Aortic aneurysm of unspecified site without mention of rupture | 4419 |
| Aneurysm of artery of upper extremity | 4420 |
| Aneurysm of renal artery | 4421 |
| Aneurysm of iliac artery | 4422 |
| Aneurysm of artery of lower extremity | 4423 |
| Aneurysm of artery of neck | 44281 |
| Aneurysm of splenic artery | 44283 |
| Aneurysm of other visceral artery | 44284 |
| Aneurysm of other specified artery | 44289 |
| Other aneurysm of unspecified site | 4429 |
| Raynaud's syndrome | 4430 |
| Thromboangiitis obliterans (Buerger's disease) | 4431 |
| Dissection of carotid artery | 44321 |
| Dissection of other artery | 44329 |
| Peripheral angiopathy in diseases classified elsewhere | 44381 |
| Embolism and thrombosis of abdominal aorta | 4440 |
| Embolism and thrombosis of thoracic aorta | 4441 |
| Embolism and thrombosis of arteries of upper extremity | 44421 |
| Embolism and thrombosis of arteries of lower extremity | 44422 |
| Embolism and thrombosis of iliac artery | 44481 |
| Embolism and thrombosis of other specified artery | 44489 |
| Embolism and thrombosis of unspecified artery | 4449 |
| Atheroembolism of lower extremity | 44502 |
| Polyarteritis nodosa | 4460 |
| Wegener's granulomatosis | 4464 |
| Giant cell arteritis | 4465 |
| Takayasu's disease | 4467 |
| Stricture of artery | 4471 |
| Rupture of artery | 4472 |
| Celiac artery compression syndrome | 4474 |
| Unspecified arteritis | 4476 |
| Other specified disorders of arteries and arterioles | 4478 |
| Unspecified disorders of arteries and arterioles | 4479 |
| Portal vein thrombosis | 452 |
| Embolism and thrombosis of vena cava | 4532 |
| Venous embolism and thrombosis of unspecified deep vessels of lower extremity | 45340 |
| Venous embolism and thrombosis of deep vessels of proximal lower extremity | 45341 |
| Venous embolism and thrombosis of deep vessels of distal lower extremity | 45342 |
| Chronic venous embolism and thrombosis of unspecified deep vessels of lower extremity | 45350 |
| Chronic venous embolism and thrombosis of deep vessels of proximal lower extremity | 45351 |
| Chronic venous embolism and thrombosis of deep vessels of distal lower extremity | 45352 |
| Emb/throm superficial lower ext | 4536 |
| Venous embolism and thrombosis of other specified veins | 4538 |
| Acute venous embolism and thrombosis of superficial veins of upper extremity | 45381 |
| Acute venous embolism and thrombosis of deep veins of upper extremity | 45382 |
| Acute venous embolism and thrombosis of upper extremity, unspecified | 45383 |
| Acute venous embolism and thrombosis of subclavian veins | 45385 |
| Acute venous embolism and thrombosis of internal jugular veins | 45386 |
| Embolism and thrombosis of unspecified site | 4539 |
| Esophageal varices with bleeding | 4560 |
| Other noninfectious lymphedema | 4571 |
| Orthostatic hypotension | 4580 |
| Chronic hypotension | 4581 |
| Hypotension of hemodialysis | 45821 |
| Other iatrogenic hypotension | 45829 |
| Other specified hypotension | 4588 |
| Unspecified hypotension | 4589 |
| Unspecified hemorrhage | 4590 |
| Unspecified circulatory system disorder | 4599 |
| Acute tracheitis without mention of obstruction | 46410 |
| Acute upper respiratory infections of other multiple sites | 4658 |
| Acute upper respiratory infections of unspecified site | 4659 |
| Acute bronchitis | 4660 |
| Acute bronchiolitis due to respiratory syncytial virus (RSV) | 46611 |
| Acute bronchiolitis due to other infectious organisms | 46619 |
| Other and unspecified diseases of upper respiratory tract | 4789 |
| Pneumonia adenovirus | 4800 |
| Pneumonia respiratory syncy virus | 4801 |
| Uns viral pneumonia | 4809 |
| Pneumococcal pneumonia | 481 |
| Pneumonia other bacteria | 48289 |
| Uns bacterial pneumonia | 4829 |
| Bronchopneumonia organism unspec | 485 |
| Pneumonia organism unspecified | 486 |
| Influenza with pneumonia | 4870 |
| Influenza w oth respiratory manif | 4871 |
| Bronchitis, not specified as acute or chronic | 490 |
| Obstructive chronic bronchitis, with (acute) exacerbation | 49121 |
| Obstructive chronic bronchitis with acute bronchitis | 49122 |
| Emphysematous bleb | 4920 |
| Other emphysema | 4928 |
| Extrinsic asthma, unspecified | 49300 |
| Extrinsic asthma with status asthmaticus | 49301 |
| Extrinsic asthma, with (acute) exacerbation | 49302 |
| Intrinsic asthma, unspecified | 49310 |
| Intrinsic asthma with status asthmaticus | 49311 |
| Intrinsic asthma, with (acute) exacerbation | 49312 |
| Chronic obstructive asthma with status asthmaticus | 49321 |
| Chronic obstructive asthma, with (acute) exacerbation | 49322 |
| Cough variant asthma | 49382 |
| Asthma, unspecified, unspecified status | 49390 |
| Asthma, unspecified with status asthmaticus | 49391 |
| Asthma, unspecified, with (acute) exacerbation | 49392 |
| Bronchiectasis with acute exacerbation | 4941 |
| Coal workers' pneumoconiosis | 500 |
| Asbestosis | 501 |
| Acute pulmonary edema due to fumes and vapors | 5061 |
| Other acute and subacute respiratory conditions due to fumes and vapors | 5063 |
| Pneumonitis inhalation food | 5070 |
| Acute pulmonary manifestations due to radiation | 5080 |
| Empyema without mention of fistula | 5109 |
| Pleurisy without mention of effusion or current tuberculosis | 5110 |
| Pleurisy with effusion, with mention of bacterial cause other than tuberculosis | 5111 |
| Other specified forms of pleural effusion, except tuberculous | 5118 |
| Malignant pleural effusion | 51181 |
| Other specified forms of effusion, except tuberculous | 51189 |
| Unspecified pleural effusion | 5119 |
| Spontaneous tension pneumothorax | 5120 |
| Iatrogenic pneumothorax | 5121 |
| Other spontaneous pneumothorax | 5128 |
| Other pneumothorax | 51289 |
| Abscess of lung | 5130 |
| Pulmonary congestion and hypostasis | 514 |
| Postinflammatory pulmonary fibrosis | 515 |
| Idiopathic fibrosing alveolitis | 5163 |
| Other specified alveolar and parietoalveolar pneumonopathies | 5168 |
| Uns alveolar pneumonopathy | 5169 |
| Acute chest syndrome | 5173 |
| Lung involvement in other diseases classified elsewhere | 5178 |
| Pulmonary collapse | 5180 |
| Compensatory emphysema | 5182 |
| Pulmonary eosinophilia | 5183 |
| Unspecified acute edema of lung | 5184 |
| Pulmonary insufficiency following trauma and surgery | 5185 |
| Acute respiratory failure following trauma and surgery | 51851 |
| Acute respiratory failure | 51881 |
| Other pulmonary insufficiency, not elsewhere classified | 51882 |
| Chronic respiratory failure | 51883 |
| Acute and chronic respiratory failure | 51884 |
| Other diseases of lung, not elsewhere classified | 51889 |
| Unspecified tracheostomy complication | 51900 |
| Mechanical complication of tracheostomy | 51902 |
| Other tracheostomy complications | 51909 |
| Other diseases of trachea and bronchus, not elsewhere classified | 5191 |
| Acute bronchospasm | 51911 |
| Other diseases of trachea and bronchus | 51919 |
| Disorders diaphragm | 5194 |
| Other diseases of respiratory system, not elsewhere classified | 5198 |
| Unspecified disease of respiratory system | 5199 |
| Inflammatory conditions of jaw | 5264 |
| Mucositis (ulcerative) due to antineoplastic therapy | 52801 |
| Achalasia and cardiospasm | 5300 |
| Unspecified esophagitis | 53010 |
| Reflux esophagitis | 53011 |
| Acute esophagitis | 53012 |
| Other esophagitis | 53019 |
| Ulcer of esophagus with bleeding | 53021 |
| Stricture and stenosis of esophagus | 5303 |
| Perforation of esophagus | 5304 |
| Gastroesophageal laceration-hemorrhage syndrome | 5307 |
| Esophageal hemorrhage | 53082 |
| Unspecified disorder of esophagus | 5309 |
| Acute gastric ulcer with hemorrhage, without mention of obstruction | 53100 |
| Acute gastric ulcer with perforation, without mention of obstruction | 53110 |
| Chronic or unspecified gastric ulcer with hemorrhage, without mention of obstruction | 53140 |
| Chronic or unspecified gastric ulcer with hemorrhage and obstruction | 53141 |
| Chronic or unspecified gastric ulcer with perforation, without mention of obstruction | 53150 |
| Chronic or unspecified gastric ulcer with hemorrhage and perforation, without mention of obstruction | 53160 |
| Gastric ulcer, unspecified as acute or chronic, without mention of hemorrhage, perforation | 53190 |
| Acute duodenal ulcer with hemorrhage, without mention of obstruction | 53200 |
| Acute duodenal ulcer with hemorrhage and perforation, without mention of obstruction | 53220 |
| Duodenal ulcer, chronic or unspecified, with hemorrhage, without mention of obstruction | 53240 |
| Chronic or unspecified duodenal ulcer with hemorrhage and obstruction | 53241 |
| Chronic or unspecified duodenal ulcer with perforation, without mention of obstruction | 53250 |
| Chronic or unspecified duodenal ulcer with hemorrhage and perforation, without mention of obstruction | 53260 |
| Acute peptic ulcer, unspecified site, with hemorrhage, without mention of obstruction | 53300 |
| Chronic or unspecified peptic ulcer, unspecified site, with hemorrhage, without mention of obstruction | 53340 |
| Chronic or unspecified gastrojejunal ulcer with hemorrhage, without mention of obstruction | 53440 |
| Acute gastritis wohemorrhage | 53500 |
| Acute gastritis with hemorrhage | 53501 |
| Atrophic gastritis with hemorrhage | 53511 |
| Alcoholic gastritis without mention of hemorrhage | 53530 |
| Alcoholic gastritis with hemorrhage | 53531 |
| Other specified gastritis with hemorrhage | 53541 |
| Unspecified gastritis and gastroduodenitis with hemorrhage | 53551 |
| Duodenitis with hemorrhage | 53561 |
| Dyspepsia and other specified disorders of function of stomach | 5368 |
| Angiodysplasia of stomach and duodenum with hemorrhage | 53783 |
| Dieulafoy lesion (hemorrhagic) of stomach and duodenum | 53784 |
| Acute appendicitis with generalized peritonitis | 5400 |
| Acute appendicitis with peritoneal abscess | 5401 |
| Acute appendicitis without mention of peritonitis | 5409 |
| Appendicitis, unqualified | 541 |
| Inguinal hernia with gangrene, unilateral or unspecified, (not specified as recurrent) | 55000 |
| Femoral hernia with gangrene, unilateral or unspecified (not specified as recurrent) | 55100 |
| Hernia of other specified site, with obstruction | 5528 |
| Uns ulcerative colitis | 5569 |
| Acute vascular insufficiency of intestine | 5570 |
| Volvulus | 5602 |
| Gallstone ileus | 56031 |
| Fecal impaction | 56032 |
| Intestinal or peritoneal adhesions with obstruction (postoperative) (postinfection) | 56081 |
| Other specified intestinal obstruction | 56089 |
| Unspecified intestinal obstruction | 5609 |
| Diverticulosis of small intestine with hemorrhage | 56202 |
| Diverticulosis of colon with hemorrhage | 56212 |
| Diverticulitis of colon with hemorrhage | 56213 |
| Spontaneous bacterial peritonitis | 56723 |
| Unspecified peritonitis | 5679 |
| Hemorrhage of rectum and anus | 5693 |
| Perforation of intestine | 56983 |
| Angiodysplasia of intestine with hemorrhage | 56985 |
| Dieulafoy lesion (hemorrhagic) of intestine | 56986 |
| Acute and subacute necrosis of liver | 570 |
| Abscess of liver | 5720 |
| Hepatic coma | 5722 |
| Portal hypertension | 5723 |
| Calculus of gallbladder with acute cholecystitis, without mention of obstruction | 57400 |
| Calculus of gallbladder with acute cholecystitis and obstruction | 57401 |
| Calculus of gallbladder with other cholecystitis, without mention of obstruction | 57410 |
| Calculus of gallbladder with other cholecystitis and obstruction | 57411 |
| Calculus of bile duct with acute cholecystitis without mention of obstruction | 57430 |
| Calculus of bile duct with acute cholecystitis and obstruction | 57431 |
| Calculus of gallbladder and bile duct with acute cholecystitis, with obstruction | 57461 |
| Calculus of gallbladder and bile duct with other cholecystitis, with obstruction | 57471 |
| Calculus of gallbladder and bile duct with acute and chronic cholecystitis, without mention of obstruction | 57480 |
| Calculus of gallbladder and bile duct with acute and chronic cholecystitis, with obstruction | 57481 |
| Acute cholecystitis | 5750 |
| Cholecystitis, unspecified | 57510 |
| Chronic cholecystitis | 57511 |
| Acute and chronic cholecystitis | 57512 |
| Perforation of gallbladder | 5754 |
| Cholangitis | 5761 |
| Acute pancreatitis | 5770 |
| Chronic pancreatitis | 5771 |
| Hematemesis | 5780 |
| Blood in stool | 5781 |
| Hemorrhage of gastrointestinal tract, unspecified | 5789 |
| Celiac disease | 5790 |
| Other and unspecified postsurgical nonabsorption | 5793 |
| Acute renal failure with lesion of tubular necrosis | 5845 |
| Acute renal failure with lesion of renal cortical necrosis | 5846 |
| Acute renal failure with other specified pathological lesion in kidney | 5848 |
| End stage renal disease | 5856 |
| Unspecified renal failure | 586 |
| Hemorrhage into bladder wall | 5967 |
| Gross hematuria | 59971 |
| Peyronie's disease | 60785 |
| Diffuse cystic mastopathy | 6101 |
| Mastodynia | 61171 |
| Lump or mass in breast | 61172 |
| Oth signs/symptoms in breast | 61179 |
| Excessive or frequent menstruation | 6262 |
| Other disorder of menstruation and other abnormal bleeding from female genital tract | 6268 |
| Postmenopausal bleeding | 6271 |
| Lupus erythematosus | 6954 |
| Psoriatic arthropathy | 6960 |
| Oth psoriasis | 6961 |
| Circumscribed scleroderma | 7010 |
| Systemic lupus erythematosus | 7100 |
| Systemic sclerosis | 7101 |
| Sicca syndrome | 7102 |
| Unspecified diffuse connective tissue disease | 7109 |
| Pyogenic arthritis shoulder | 71101 |
| Pyogenic arthritis, lower leg | 71106 |
| Rheumatoid arthritis | 7140 |
| Rheumatoid arthritis visceral/syst | 7142 |
| Rheumatoid lung | 71481 |
| Uns inflammatory polyarthropathy | 7149 |
| Uns polyarthrit/arthropth site uns | 71650 |
| Effusion of joint shoulder | 71901 |
| Pain in joint, shoulder region | 71941 |
| Degenerat thoracic iv disc | 72251 |
| Oth syndromes affecting cervical | 7238 |
| Pain in thoracic spine | 7241 |
| Lumbago | 7242 |
| Thoracic or lumbosacral neuritis or radiculitis, unspecified | 7244 |
| Unspecified backache | 7245 |
| Other symptoms referable to back | 7248 |
| Polymyalgia rheumatica | 725 |
| Other affections of shoulder region, not elsewhere classified | 7262 |
| Necrotizing fasciitis | 72886 |
| Muscle weakness | 72887 |
| Rhabdomyolysis | 72888 |
| Rheumatism uns/fibrositis | 7290 |
| Uns myalgia/myositis | 7291 |
| Panniculitis of other sites | 72939 |
| Swelling of limb | 72981 |
| Acute osteomyelitis, site unspecified | 73000 |
| Acute osteomyelitis, lower leg | 73006 |
| Acute osteomyelitis, ankle and foot | 73007 |
| Acute osteomyelitis, other specified site | 73008 |
| Chronic osteomyelitis, pelvic region and thigh | 73015 |
| Chronic osteomyelitis, lower leg | 73016 |
| Chronic osteomyelitis, ankle and foot | 73017 |
| Chronic osteomyelitis, other specified sites | 73018 |
| Unspecified osteomyelitis, site unspecified | 73020 |
| Unspecified osteomyelitis, hand | 73024 |
| Unspecified osteomyelitis, pelvic region and thigh | 73025 |
| Unspecified osteomyelitis, other specified sites | 73028 |
| Pathologic fracture of humerus | 73311 |
| Pathological fracture vertebrae | 73313 |
| Pathologic fracture of neck of femur | 73314 |
| Pathologic fracture of other specified part of femur | 73315 |
| Pathologic fracture of other specified site | 73319 |
| Aseptic necrosis of bone, site unspecified | 73340 |
| Aseptic necrosis of head of humerus | 73341 |
| Aseptic necrosis of head and neck of femur | 73342 |
| Aseptic necrosis of other bone site | 73349 |
| Tietze's disease | 7336 |
| Stress fracture of femoral neck | 73396 |
| Kyphosis | 73710 |
| Scoliosis oth conditions | 73743 |
| Acquired deformity chest/rib | 7383 |
| Oth acquired deformity back/spine | 7385 |
| Nonallopathic lesion of thoracic region, not elsewhere classified | 7392 |
| Bulbus cordis anomalies and anomalies of cardiac septal closure, common truncus | 7450 |
| Complete transposition of great vessels | 74510 |
| Transposition of great vessels, double outlet right ventricle | 74511 |
| Corrected transposition of great vessels | 74512 |
| Tetralogy of Fallot | 7452 |
| Bulbus cordis anomalies and anomalies of cardiac septal closure, common ventricle | 7453 |
| Ventricular septal defect | 7454 |
| Ostium secundum type atrial septal defect | 7455 |
| Unspecified type congenital endocardial cushion defect | 74560 |
| Ostium primum defect | 74561 |
| Other congenital endocardial cushion defect | 74569 |
| Unspecified congenital defect of septal closure | 7459 |
| Unspecified congenital pulmonary valve anomaly | 74600 |
| Congenital atresia of pulmonary valve | 74601 |
| Congenital stenosis of pulmonary valve | 74602 |
| Other congenital anomalies of pulmonary valve | 74609 |
| Congenital tricuspid atresia and stenosis | 7461 |
| Ebstein's anomaly | 7462 |
| Congenital stenosis of aortic valve | 7463 |
| Congenital insufficiency of aortic valve | 7464 |
| Congenital mitral stenosis | 7465 |
| Congenital mitral insufficiency | 7466 |
| Hypoplastic left heart syndrome | 7467 |
| Congenital subaortic stenosis | 74681 |
| Congenital coronary artery anomaly | 74685 |
| Congenital heart block | 74686 |
| Congenital malposition of heart and cardiac apex | 74687 |
| Other specified congenital anomaly of heart | 74689 |
| Unspecified congenital anomaly of heart | 7469 |
| Patent ductus arteriosus | 7470 |
| Coarctation of aorta (preductal) (postductal) | 74710 |
| Unspecified congenital anomaly of aorta | 74720 |
| Congenital atresia and stenosis of aorta | 74722 |
| Other congenital anomaly of aorta | 74729 |
| Congenital anomalies of pulmonary artery | 7473 |
| Congenital anomaly of the peripheral vascular system, unspecified site | 74760 |
| Congenital anomaly of cerebrovascular system | 74781 |
| Uns anomaly lung | 74860 |
| Congenital tracheoesophageal fistula, esophageal atresia and stenosis | 7503 |
| Anomalies diaphragm | 7566 |
| Down's syndrome | 7580 |
| Marfan's syndrome | 75982 |
| Other specified multiple congenital anomalies, so described | 75989 |
| Respiratory distress syndrome in newborn | 769 |
| Coma | 78001 |
| Transient alteration of awareness | 78002 |
| Other alteration of consciousness | 78009 |
| Hallucinations | 7801 |
| Syncope and collapse | 7802 |
| Dizziness and giddiness | 7804 |
| Fever | 7806 |
| Fever unspecified | 78060 |
| Hypothermia not associated with low environmental temperature | 78065 |
| Chronic fatigue syndrome | 78071 |
| Other malaise and fatigue | 78079 |
| Memory loss | 78093 |
| Generalized pain | 78096 |
| Altered mental status | 78097 |
| Transient paralysis of limb | 7814 |
| Localized superficial swelling | 7822 |
| Edema | 7823 |
| Cyanosis | 7825 |
| Spontaneous ecchymoses | 7827 |
| Anorexia | 7830 |
| Loss of weight | 78321 |
| Failure to thrive | 78341 |
| Polydipsia | 7835 |
| Adult failure to thrive | 7837 |
| Headache | 7840 |
| Swelling/mass/lump in head/neck | 7842 |
| Other speech disturbance | 7845 |
| Epistaxis | 7847 |
| Jaw pain | 78492 |
| Unspecified tachycardia | 7850 |
| Palpitations | 7851 |
| Undiagnosed cardiac murmurs | 7852 |
| Other abnormal heart sounds | 7853 |
| Gangrene | 7854 |
| Unspecified shock | 78550 |
| Cardiogenic shock | 78551 |
| Septic shock | 78552 |
| Other shock without mention of trauma | 78559 |
| Enlargement of lymph nodes | 7856 |
| Other symptoms involving cardiovascular system | 7859 |
| Unspecified respiratory abnormality | 78600 |
| Hyperventilation | 78601 |
| Orthopnea | 78602 |
| Apnea | 78603 |
| Cheyne-Stokes respiration | 78604 |
| Shortness of breath | 78605 |
| Tachypnea | 78606 |
| Wheezing | 78607 |
| Other dyspnea and respiratory abnormalities | 78609 |
| Stridor | 7861 |
| Cough | 7862 |
| Hemoptysis | 7863 |
| Hemoptysis unspecified | 78630 |
| Other hemoptysis | 78639 |
| Precordial pain | 78651 |
| Painful respiration | 78652 |
| Chest pain, other | 78659 |
| Swelling/mass/lump in chest | 7866 |
| Abnormal chest sounds | 7867 |
| Other symptoms involving respiratory system and chest | 7869 |
| Heartburn | 7871 |
| Dysphagia | 7872 |
| Abdominal pain, unspecified site | 78900 |
| Abdominal pain, right upper quadrant | 78901 |
| Abdominal pain, left upper quadrant | 78902 |
| Abdominal pain, right lower quadrant | 78903 |
| Abdominal pain, left lower quadrant | 78904 |
| Abdominal pain, periumbilic | 78905 |
| Abdominal pain, epigastric | 78906 |
| Abdominal pain, generalized | 78907 |
| Abdominal pain, other specified site | 78909 |
| Abdom/pelvic swelling unsp site | 78930 |
| Malignant ascites | 78951 |
| Other ascites | 78959 |
| Abdominal tenderness, unspecified site | 78960 |
| Abdominal tenderness, right upper quadrant | 78961 |
| Abdominal tenderness, right lower quadrant | 78963 |
| Abdominal tenderness, left lower quadrant | 78964 |
| Abdominal tenderness, epigastric | 78966 |
| Abdominal tenderness, generalized | 78967 |
| Abdominal tenderness, other specified site | 78969 |
| Oth abnormality red blood cells | 79009 |
| Elevated sedimentation rate | 7901 |
| Other abnormal glucose | 79029 |
| Nonspecific elevation of levels of transaminase or lactic acid dehydrogenase (LDH) | 7904 |
| Other nonspecific abnormal serum enzyme levels | 7905 |
| Other abnormal blood chemistry | 7906 |
| Bacteremia | 7907 |
| Abnormal arterial blood gases | 79091 |
| Elevated c-reactive protein | 79095 |
| Other nonspecific findings on examination of blood | 79099 |
| Nonspecific abnormal findings on radiological and other examination of lung field | 7931 |
| Abnormal findings lung field other | 79319 |
| Nonspecific abnormal findings on radiological and other examination of other intrathoracic organs | 7932 |
| Unsp abnormal mammogram | 79380 |
| Mammographic microcalcification | 79381 |
| Ot abnormal radiolog exam breast | 79389 |
| Nonspecific abnormal electroencephalogram (EEG) | 79402 |
| Nonspecific abnormal results of pulmonary system function study | 7942 |
| Nonspecific abnormal unspecified cardiovascular function study | 79430 |
| Nonspecific abnormal electrocardiogram (ECG) (EKG) | 79431 |
| Other nonspecific abnormal cardiovascular system function study | 79439 |
| Nonspecific reaction tb test | 7955 |
| Other abnormal tumor markers | 79589 |
| Nonspecific abnormal toxicological findings | 7960 |
| Nonspecific low blood pressure reading | 7963 |
| Hypoxemia | 79902 |
| Respiratory arrest | 7991 |
| Symptoms involv emotional state | 7992 |
| Cachexia | 7994 |
| Closed fracture of base of skull without mention of intracranial injury, unspecified state | 80100 |
| Closed fracture of base of skull without mention of intracranial injury, no loss of consciousness | 80101 |
| Closed fracture of base of skull without mention of intracranial injury, loss of consciousness | 80106 |
| Closed fracture of base of skull with subarachnoid, subdural, and extradural hemorrhage, unspecified state of consciousness | 80120 |
| Closed fracture of base of skull with subarachnoid, subdural, and extradural hemorrhage, with no loss of consciousness | 80121 |
| Closed fracture of base of skull with subarachnoid, subdural, and extradural hemorrhage, with brief [less than one hour] loss of consciousness) | 80122 |
| Closed fracture of base of skull with subarachnoid, subdural, and extradural hemorrhage, with loss of consciousness of unspecified duration | 80126 |
| Fracture cervical vert unsp cl | 80500 |
| Fracture c2 vertebra closed | 80502 |
| Closed fracture of third cervical vertebra without mention of spinal cord injury | 80503 |
| Closed fracture of fourth cervical vertebra without mention of spinal cord injury | 80504 |
| Closed fracture of fifth cervical vertebra without mention of spinal cord injury | 80505 |
| Fracture c6 vertebra closed | 80506 |
| Closed fracture of seventh cervical vertebra without mention of spinal cord injury | 80507 |
| Closed fracture of multiple cervical vertebrae without mention of spinal cord injury | 80508 |
| Closed fracture of dorsal (thoracic) vertebra without mention of spinal cord injury | 8052 |
| Fracture lumbar vertebra close | 8054 |
| Vertebral fracture unsp closed | 8058 |
| Closed fracture of C1-C4 level with unspecified spinal cord injury | 80600 |
| Closed fracture of C5-C7 level with unspecified spinal cord injury | 80605 |
| Closed fracture of T7-T12 level with unspecified spinal cord injury | 80625 |
| Closed fracture of lumbar spine with spinal cord injury | 8064 |
| Closed fracture of rib(s), unspecified | 80700 |
| Closed fracture of one rib | 80701 |
| Closed fracture of two ribs | 80702 |
| Closed fracture of three ribs | 80703 |
| Closed fracture of four ribs | 80704 |
| Closed fracture of five ribs | 80705 |
| Closed fracture of six ribs | 80706 |
| Closed fracture of seven ribs | 80707 |
| Closed fracture of eight or more ribs | 80708 |
| Closed fracture of multiple ribs, unspecified | 80709 |
| Closed fracture of sternum | 8072 |
| Flail chest | 8074 |
| Closed fracture of acetabulum | 8080 |
| Closed fracture of pubis | 8082 |
| Closed fracture of ilium | 80841 |
| Closed fracture of ischium | 80842 |
| Multiple closed pelvic fractures with disruption of pelvic circle | 80843 |
| Unspecified closed fracture of pelvis | 8088 |
| Unspecified part of closed fracture of clavicle | 81000 |
| Closed fracture of shaft of clavicle | 81002 |
| Closed fracture of acromial end of clavicle | 81003 |
| Closed fracture of unspecified part of scapula | 81100 |
| Closed fracture of glenoid cavity and neck of scapula | 81103 |
| Closed fracture of unspecified part of upper end of humerus | 81200 |
| Closed fracture of surgical neck of humerus | 81201 |
| Closed fracture of anatomical neck of humerus | 81202 |
| Closed fracture of greater tuberosity of humerus | 81203 |
| Other closed fractures of upper end of humerus | 81209 |
| Closed fracture of unspecified part of humerus | 81220 |
| Closed fracture of shaft of humerus | 81221 |
| Closed fracture of unspecified part of lower end of humerus | 81240 |
| Closed fracture of supracondylar humerus | 81241 |
| Closed fracture of unspecified condyle(s) of humerus | 81244 |
| Other closed fracture of lower end of humerus | 81249 |
| Ill-defined closed fractures of upper limb | 8180 |
| Closed fracture of unspecified intracapsular section of neck of femur | 82000 |
| Closed fracture of epiphysis (separation) (upper) of neck of femur | 82001 |
| Closed fracture of midcervical section of femur | 82002 |
| Closed fracture of base of neck of femur | 82003 |
| Other closed transcervical fracture of femur | 82009 |
| Closed fracture of unspecified trochanteric section of femur | 82020 |
| Closed fracture of intertrochanteric section of femur | 82021 |
| Closed fracture of subtrochanteric section of femur | 82022 |
| Open fracture of intertrochanteric section of femur | 82031 |
| Closed fracture of unspecified part of neck of femur | 8208 |
| Open fracture of unspecified part of neck of femur | 8209 |
| Closed fracture of unspecified part of femur | 82100 |
| Closed fracture of shaft of femur | 82101 |
| Closed fracture of unspecified part of lower end of femur | 82120 |
| Closed fracture of femoral condyle | 82121 |
| Closed supracondylar fracture of femur | 82123 |
| Other closed fracture of lower end of femur | 82129 |
| Open fracture of unspecified part of lower end of femur | 82130 |
| Open supracondylar fracture of femur | 82133 |
| Disloc shoulder unsp closed | 83100 |
| Closed anterior dislocation of humerus | 83101 |
| Sprain and strain of other specified sites of shoulder and upper arm | 8408 |
| Sprain and strain of unspecified site of shoulder and upper arm | 8409 |
| Thoracic sprain and strain | 8471 |
| Sprain and strain of unspecified site of back | 8479 |
| Sprain and strain of ribs | 8483 |
| Concussion, with loss of consciousness of 30 minutes or less | 85011 |
| Concussion with loss of consciousness of unspecified duration | 8505 |
| Unspecified concussion | 8509 |
| Cerebellar or brain stem contusion without mention of open intracranial wound, no loss of consciousness | 85141 |
| Other and unspecified cerebral laceration and contusion, without mention of open intracranial wound, unspecified state of consciousness | 85180 |
| Other and unspecified cerebral laceration and contusion, without mention of open intracranial wound, with no loss of consciousness | 85181 |
| Subarachnoid hemorrhage following injury, without mention of open intracranial wound, unspecified state of consciousness | 85200 |
| Subarachnoid hemorrhage following injury, without mention of open intracranial wound, no loss of consciousness | 85201 |
| Subarachnoid hemorrhage following injury, without mention of open intracranial wound, brief loss of consciousness | 85202 |
| Subarachnoid hemorrhage following injury, without mention of open intracranial wound, loss of consciousness | 85206 |
| Subdural hemorrhage following injury, without mention of open intracranial wound, unspecified state of consciousness | 85220 |
| Subdural hemorrhage following injury, without mention of open intracranial wound, no loss of consciousness | 85221 |
| Subdural hemorrhage following injury, without mention of open intracranial wound, brief loss of consciousness | 85222 |
| Subdural hemorrhage following injury, without mention of open intracranial wound, without mention of open intracranial wound, with prolonged [more than 24 hours] loss of consciousness without return to pre-existing conscious level | 85225 |
| Subdural hemorrhage following injury, without mention of open intracranial wound, loss of consciousness | 85226 |
| Subdural hemorrhage following injury, without mention of open intracranial wound, unspecified state of consciousness | 85229 |
| Extradural hemorrhage following injury, without mention of open intracranial wound, unspecified state of consciousness | 85240 |
| Extradural hemorrhage following injury, without mention of open intracranial wound, no loss of consciousness | 85241 |
| Other and unspecified intracranial hemorrhage following injury, without mention of open intracranial wound, unspecified state of consciousness | 85300 |
| Other and unspecified intracranial hemorrhage following injury, without mention of open intracranial wound, with no loss of consciousness | 85301 |
| Other and unspecified intracranial hemorrhage following injury, without mention of open intracranial wound, with brief [less than one hour] loss of consciousness | 85302 |
| Other and unspecified intracranial hemorrhage following injury without mention of open intracranial wound, with prolonged [more than 24 hours] loss of consciousness without return to pre-existing conscious level | 85305 |
| Intracranial injury of other and unspecified nature, without mention of open intracranial wound, unspecified state of consciousness | 85400 |
| Intracranial injury of other and unspecified nature, without mention of open intracranial wound, with no loss of consciousness | 85401 |
| Intracranial injury of other and unspecified nature, without mention of open intracranial wound, with brief [less than one hour] loss of consciousness | 85402 |
| Intracranial injury of other and unspecified nature, without mention of open intracranial wound, with loss of consciousness of unspecified duration | 85406 |
| Traumatic pneumothorax without mention of open wound into thorax | 8600 |
| Traumatic hemothorax without mention of open wound into thorax | 8602 |
| Traumatic pneumohemothorax without mention of open wound into thorax | 8604 |
| Unspecified injury to heart without mention of open wound into thorax | 86100 |
| Heart contusion without mention of open wound into thorax | 86101 |
| Lung contusion without mention of open wound into thorax | 86121 |
| Injury to other specified intrathoracic organs without mention of open wound into cavity | 86229 |
| Injury to multiple and unspecified intrathoracic organs without mention of open wound into cavity | 8628 |
| Massive parenchymal disruption of spleen without mention of open wound into cavity | 86504 |
| Thoracic aorta injury | 9010 |
| Late effect of adverse effect of drug, medical or biological substance | 9095 |
| Contusion face/scalp/nck | 920 |
| Contusion of breast | 9220 |
| Contusion of chest wall | 9221 |
| Contusion of abdominal wall | 9222 |
| Contusion of unspecified part of trunk | 9229 |
| Contusion of shoulder region | 92300 |
| Contusion of uns site | 9249 |
| Foreign body in trachea | 9340 |
| Foreign body in main bronchus | 9341 |
| Foreign body in other specified parts of trachea, bronchus, and lung | 9348 |
| C1-C4 level with central cord syndrome | 95203 |
| Unspecified site of spinal cord injury without spinal bone injury | 9529 |
| Traumatic shock | 9584 |
| Uns head injury | 95901 |
| Injury face/neck | 95909 |
| Other injury of chest wall | 95911 |
| Other injury of abdomen | 95912 |
| Other injury other sites of trunk | 95919 |
| Injury, other and unspecified, shoulder and upper arm | 9592 |
| Injury, other and unspecified, other specified sites, including multiple | 9598 |
| Injury uns site | 9599 |
| Poisoning by adrenal cortical steroids | 9620 |
| Poisoning by insulins and antidiabetic agents | 9623 |
| Poisoning by antiallergic and antiemetic drugs | 9630 |
| Poisoning by antineoplastic and immunosuppressive drugs | 9631 |
| Poisoning by anticoagulants | 9642 |
| Poisoning by opium (alkaloids), unspecified | 96500 |
| Poisoning by heroin | 96501 |
| Poisoning by methadone | 96502 |
| Poisoning by opiates and related narcotics, other | 96509 |
| Poisoning by salicylates | 9651 |
| Poisoning by aromatic analgesics, not elsewhere classified | 9654 |
| Poisoning by propionic acid derivatives | 96561 |
| Poisoning by other specified analgesics and antipyretics | 9658 |
| Poisoning by unspecified analgesic and antipyretic | 9659 |
| Poisoning by hydantoin derivatives | 9661 |
| Poisoning by other and unspecified anticonvulsants | 9663 |
| Poisoning by barbiturates | 9670 |
| Poisoning by other sedatives and hypnotics | 9678 |
| Poisoning by unspecified sedative or hypnotic | 9679 |
| Poisoning by central nervous system muscle-tone depressants | 9680 |
| Poisoning by surface (topical) and infiltration anesthetics | 9685 |
| Poisoning by antidepressants | 9690 |
| Poisoning antidepressants unspec | 96900 |
| Poisoning SSRI | 96903 |
| Poisoning tricyclic antidepress | 96905 |
| Poisoning antidepressants other | 96909 |
| Poisoning by phenothiazine-based tranquilizers | 9691 |
| Poisoning by butyrophenone-based tranquilizers | 9692 |
| Poisoning by other antipsychotics, neuroleptics, and major tranquilizers | 9693 |
| Poisoning by benzodiazepine-based tranquilizers | 9694 |
| Poisoning by other tranquilizers | 9695 |
| Poisoning by psychodysleptics (hallucinogens) | 9696 |
| Poisoning by psychostimulants | 9697 |
| Poisoning by amphetamines | 96972 |
| Poisoning by other specified psychotropic agents | 9698 |
| Poisoning by opiate antagonists | 9701 |
| Poisoning by other specified central nervous system stimulants | 9708 |
| Poisoning by cocaine | 97081 |
| Poisoning by parasympathomimetics (cholinergics) | 9710 |
| Poisoning by parasympatholytics (anticholinergics and antimuscarinics) and spasmolytics | 9711 |
| Poisoning by sympathomimetics (adrenergics) | 9712 |
| Poisoning by sympatholytics (antiadrenergics) | 9713 |
| Poisoning by cardiac rhythm regulators | 9720 |
| Poisoning by cardiotonic glycosides and drugs of similar action | 9721 |
| Poisoning by antilipemic and antiarteriosclerotic drugs | 9722 |
| Poisoning by coronary vasodilators | 9724 |
| Poisoning by other antihypertensive agents | 9726 |
| Poisoning by other and unspecified agents primarily affecting the cardiovascular system | 9729 |
| Poisoning by other diuretics | 9744 |
| Poisoning by electrolytic, caloric, and water-balance agents | 9745 |
| Poisoning by skeletal muscle relaxants | 9752 |
| Poisoning by antitussives | 9754 |
| Poisoning by other specified drugs and medicinal substances | 9778 |
| Poisoning by unspecified drug or medicinal substance | 9779 |
| Toxic effect of ethyl alcohol | 9800 |
| Toxic effect of isopropyl alcohol | 9802 |
| Toxic effect of unspecified alcohol | 9809 |
| Toxic effect of other nonpetroleum-based solvents | 9828 |
| Toxic effect of caustic, unspecified | 9839 |
| Toxic effect of other specified metals | 9858 |
| Toxic effect of carbon monoxide | 986 |
| Toxic effect of other specified gases, fumes, or vapors | 9878 |
| Toxic effect of unspecified gas, fume, or vapor | 9879 |
| Toxic effect of other pesticides, not elsewhere classified | 9894 |
| Toxic effect of venom | 9895 |
| Toxic effect of tobacco | 98984 |
| Toxic effect of other substances | 98989 |
| Toxic effect of unspecified substance, chiefly nonmedicinal as to source | 9899 |
| Effects of radiation, unspecified | 990 |
| Effects of hypothermia | 9916 |
| Heat stroke and sunstroke | 9920 |
| Heat syncope | 9921 |
| Heat exhaustion, anhydrotic | 9923 |
| Heat exhaustion, unspecified | 9925 |
| Other specified heat effects | 9928 |
| Unspecified effects of heat and light | 9929 |
| Other and unspecified effects of high altitude | 9932 |
| Effects of lightning | 9940 |
| Drowning and nonfatal submersion | 9941 |
| Exhaustion due to excessive exertion | 9945 |
| Electrocution and nonfatal effects of electric current | 9948 |
| Other anaphylactic shock not elsewhere classified | 9950 |
| Angioneurotic edema not elsewhere classified | 9951 |
| Other and unspecified adverse effect of drug, medicinal and biological substance | 9952 |
| Unspecified adverse effect of unspecified drug, medicinal and biological substance | 99520 |
| Unspecified adverse effect of insulin | 99523 |
| Unspecified adverse effect of other drug, medicinal and biological substance | 99529 |
| Sepsis | 99591 |
| Severe sepsis | 99592 |
| Mechanical complication of unspecified cardiac device, implant, and graft | 99600 |
| Mechanical complication due to cardiac pacemaker (electrode) | 99601 |
| Mechanical complication due to heart valve prosthesis | 99602 |
| Mechanical complication due to coronary bypass graft | 99603 |
| Mechanical complication due to automatic implantable cardiac defibrillator | 99604 |
| Mechanical complication of cardiac device, implant, and graft, other | 99609 |
| Mechanical complication of other vascular device, implant, and graft | 9961 |
| Mechanical complication due to other tissue graft, not elsewhere classified | 99652 |
| Mechanical complication due to other implant and internal device, not elsewhere classified | 99659 |
| Infection and inflammatory reaction due to unspecified device, implant, and graft | 99660 |
| Infection and inflammatory reaction due to cardiac device, implant, and graft | 99661 |
| Infection and inflammatory reaction due to other vascular device, implant, and graft | 99662 |
| Infection and inflammatory reaction due to peritoneal dialysis catheter | 99668 |
| Other complications due to heart valve prosthesis | 99671 |
| Other complications due to other cardiac device, implant, and graft | 99672 |
| Other complications due to renal dialysis device, implant, and graft | 99673 |
| Other complications due to other vascular device, implant, and graft | 99674 |
| Complications of transplanted kidney | 99681 |
| Complications of transplanted liver | 99682 |
| Complications of transplanted heart | 99683 |
| Complications of transplanted lung | 99684 |
| Central nervous system complication | 99701 |
| Iatrogenic cerebrovascular infarction or hemorrhage | 99702 |
| Cardiac complications | 9971 |
| Respiratory complications | 9973 |
| Other respiratory complications | 99739 |
| Infection (chronic) of amputation stump | 99762 |
| Other late amputation stump complication | 99769 |
| Vascular complications of other vessels | 99779 |
| Postoperative shock, not elsewhere classified | 9980 |
| Hemorrhage complicating a procedure | 99811 |
| Hematoma complication proced | 99812 |
| Accidental puncture or laceration during procedure | 9982 |
| Other postop infection | 99859 |
| Cataract fragments in eye following surgery | 99882 |
| Complications of medical care, NEC, infection due to central venous catheter | 99931 |
| Bloodstream infection central line | 99932 |
| Other infusion and transfusion reaction | 9998 |
| Traffic acc nos-pers nos | E8199 |
| Acc cut/hem in surgery | E8700 |
| Abn react-surg proc nec | E8788 |
| Fall from other slipping, tripping, or stumbling | E8859 |
| Fall nec | E8888 |
| Unspecified fall | E8889 |
| Accident nos | E9289 |
| Antineoplastic and immunosuppressive drugs causing adverse effect in therapeutic use | E9331 |
| Cardiac rhythm regulators causing adverse effect in therapeutic use | E9420 |
| Adv eff antilipemics | E9422 |
| Contact/exposure to tb | V011 |
| Asymptomatic human immunodeficiency virus (HIV) infection status | V08 |
| Personal history of malignant neoplasm of large intestine | V1005 |
| Personal history of malignant neoplasm of rectum, rectosigmoid junction, and anus | V1006 |
| Personal history of malignant neoplasm of bronchus and lung | V1011 |
| Personal history of malignant neoplasm of breast | V103 |
| Personal history of malignant neoplasm of ovary | V1043 |
| Personal history of malignant neoplasm of prostate | V1046 |
| Personal history of malignant neoplasm of bladder | V1051 |
| History other malignancy skin | V1083 |
| History tuberculosis | V1201 |
| Personal history of sudden cardiac arrest | V1253 |
| Personal history of transient ischemic attack [TIA], and cerebral infarction without resid | V1254 |
| Personal history of other diseases of circulatory system | V1259 |
| History pneumonia | V1261 |
| Personal history of surgery to heart and great vessels, presenting hazards to health | V151 |
| History exposure to asbestos | V1584 |
| Personal history of fall | V1588 |
| Other mental problems | V402 |
| Kidney replaced by transplant | V420 |
| Heart replaced by transplant | V421 |
| Heart valve replaced by transplant | V422 |
| Lung replaced by transplant | V426 |
| Liver replaced by transplant | V427 |
| Bone marrow replaced by transplant | V4281 |
| Organ or tissue replaced by other means, Heart assist device | V4321 |
| Heart valve replaced by other means | V433 |
| Blood vessel replaced by other means | V434 |
| Unspecified cardiac device in situ | V4500 |
| Cardiac pacemaker in situ | V4501 |
| Automatic implantable cardiac defibrillator in situ | V4502 |
| Other specified cardiac device in situ | V4509 |
| Renal dialysis status | V451 |
| Renal dialysis status | V4511 |
| Postprocedural aortocoronary bypass status | V4581 |
| Postprocedural percutaneous transluminal coronary angioplasty status | V4582 |
| Other cardiorespiratory problems | V472 |
| Fitting and adjustment of cardiac pacemaker | V5331 |
| Fitting and adjustment of automatic implantable cardiac defibrillator | V5332 |
| Fitting and adjustment of other cardiac device | V5339 |
| Removal int fixation device | V5401 |
| Attention to tracheostomy | V550 |
| Encounter for extracorporeal dialysis | V560 |
| Fitting and adjustment of extracorporeal dialysis catheter | V561 |
| Fitting and adjustment of peritoneal dialysis catheter | V562 |
| Radiotherapy | V580 |
| Encounter for antineoplastic chemotherapy | V5811 |
| Encounter for antineoplastic immunotherapy | V5812 |
| Aftercare following surgery for neoplasm | V5842 |
| Aftercare following organ transplant | V5844 |
| Encounter for long-term (current) use of other medications | V5869 |
| Fitting and adjustment of vascular catheter | V5881 |
| Encounter for therapeutic drug monitoring | V5883 |
| Kidney donor | V594 |
| Suicidal ideation | V6284 |
| Chemotherapy follow-up examination | V672 |
| Follow-up examination following completed treatment with high-risk medications, not elsewhere classifed | V6751 |
| Issue of repeat prescriptions | V681 |
| Other and unspecified general psychiatric examination | V702 |
| Examination of participant in clinical trial | V707 |
| Observation of other suspected mental condition | V7109 |
| Observation for suspected malignant neoplasm | V711 |
| Observ suspected tb | V712 |
| Observ following oth accident | V714 |
| Observation for suspected cardiovascular disease | V717 |
| Screening for pulmonary tb | V741 |
| Screening mammogram ot | V7612 |
| Special screening mal neo ot | V7649 |
| Screening for defic anemia ot | V781 |

*ICD-9 Codes for Excluding Chest X-Rays*

Chest x-rays were excluded from the analysis if the associated primary, secondary, tertiary, or quaternary diagnosis involved: (i) fever; (ii) fatigue or malaise; (iii) vertebral or spine symptoms; (iv) pneumonia; (v) cancer; (vi) chest pain; (vii) acute respiratory symptoms; (viii) trauma or hemorrhage; (ix) cardiac disease; (x) toxicity; (xi) drug monitoring; (xii) end stage or acute renal failure and dialysis, but not chronic early stage renal insufficiency; (xiii) abdominal pain and conditions associated with abdominal pain; (xiv) asbestosis; (xv) esophageal symptoms and disease; (xvi) acute central nervous system disease; (xvi) shoulder or limb pain; (xvii) weight loss or cachexia.

| **Label** | **Code** |
| --- | --- |
| Pulmonary diseases other mycobact | 0310 |
| Streptococcal septicemia | 0380 |
| Meth susc staph aureus septicemia | 03811 |
| Escherichia coli septicemia | 03842 |
| Uns septicemia | 0389 |
| Mssa infection | 04111 |
| Mrsa infection | 04112 |
| Human immunodeficiency virus dis | 042 |
| Unspecified viral infection | 07999 |
| Lyme disease | 08881 |
| Sarcoidosis | 135 |
| Uns malignant neoplasm colon | 1539 |
| Malignant neoplasm rectum | 1541 |
| Malig neo pancreas part uns | 1579 |
| Malig neo upper lobe bronchus/lung | 1623 |
| Malig neo oth parts bronchus/lung | 1628 |
| Uns malignant neo bronchus/lung | 1629 |
| Melanoma skin site unspecified | 1729 |
| Oth malig neo ear skin external | 1732 |
| Malig neo skin oth uns parts face | 1733 |
| Oth malignant neo scalp/skin neck | 1734 |
| Oth malig neo skin l limb inc hip | 1737 |
| Oth malignant neo skin site uns | 1739 |
| Malignant neoplasm fem breast uoq | 1744 |
| Malig neo other sites fem breast | 1748 |
| Uns malignant neoplasm breast | 1749 |
| Malignant neoplasm ovary | 1830 |
| Malignant neo prostate | 185 |
| Uns malignant neoplasm bladder | 1889 |
| Malig neo kidney ex renal pelvis | 1890 |
| Malignant neo thyroid gland | 193 |
| Sec malignant neoplasm lung | 1970 |
| Sec malig neo bone/bone marrow | 1985 |
| Oth malig neo wo specification site | 1991 |
| Oth lymphomas uns extranod | 20280 |
| Multiple myeloma wo remission | 20300 |
| Chronic lymphoid leukemia wo remis | 20410 |
| Benign neoplasm bronchus/lung | 2123 |
| Benign neoplasm cerebral meninges | 2252 |
| Ca in situ breast | 2330 |
| Ca in situ prostate | 2334 |
| Uncert behavior neo intestine | 2352 |
| Uncert behavior neo lung | 2357 |
| Uncert behavior neo prostate | 2365 |
| Uncert behavior neo bladder | 2367 |
| Uncert behavior neo kidney | 23691 |
| Uncert behavior neo skin | 2382 |
| Uncert behavior neo breast | 2383 |
| Polycythemia vera | 2384 |
| Essential thrombocythemia | 23871 |
| Lo gr myelodysplastic synd lesions | 23872 |
| Myelodysplastic syndrome unspec | 23875 |
| Respiratory unsp behavior neo | 2391 |
| Bone/skin unsp behavior neo | 2392 |
| Bladder unsp behavior neo | 2394 |
| Ot gu unsp behavior neo | 2395 |
| Brain unsp behavior neo | 2396 |
| Endonerv unsp behavior neo | 2397 |
| Unsp behavior neo | 2399 |
| Acute thyroiditis | 2450 |
| Diabetes ketoacidosis type ii | 25010 |
| Diabetes hypersmolarity type ii | 25020 |
| Glucocorticoid deficiency | 25541 |
| Uns protein calorie malnutrition | 2639 |
| Disturb sulphur amino acid metabol | 2704 |
| Monoclonal paraproteinemia | 2731 |
| Disorders of iron metabolism | 2750 |
| Disorders magnesium metabolism | 2752 |
| Disorders phosphorus metabolism | 2753 |
| Uns disorder calcium metabolism | 27540 |
| Hypocalcemia | 27541 |
| Hypercalcemia | 27542 |
| Oth disorders calcium metabolism | 27549 |
| Hyperosmolality/or hypernatremia | 2760 |
| Hyposmolality/or hyponatremia | 2761 |
| Acidosis | 2762 |
| Volume depletion unspecified | 27650 |
| Dehydration | 27651 |
| Fluid overload | 2766 |
| Hyperpotassemia | 2767 |
| Hypopotassemia | 2768 |
| Electrolyte/fluid disorders oth | 2769 |
| Autoimmune disease other | 2794 |
| Iron deficiency anemia blood loss | 2800 |
| Iron def anemia inadeq iron intake | 2801 |
| Other iron deficiency anemias | 2808 |
| Uns iron deficiency anemia | 2809 |
| Pernicious anemia | 2810 |
| Oth vitamin b12 deficiency anemia | 2811 |
| Folate deficiency anemia | 2812 |
| Other megaloblastic anemias oth | 2813 |
| Anemia w ot nutritional deficiency | 2818 |
| Uns deficiency anemia | 2819 |
| Uns acquired hemolytic anemia | 2839 |
| Pancytopenia | 2841 |
| Other aplastic anemias | 2848 |
| Sideroblastic anemia | 2850 |
| Acute posthemorrhagic anemia | 2851 |
| Anemia chronic kidney disease | 28521 |
| Anemia of other chronic disease | 28529 |
| Other specified anemias | 2858 |
| Anemia unspecified | 2859 |
| Intrin circ anticoag hemorr dis | 2865 |
| Defibrination syndrome | 2866 |
| Oth nonthrombocytopenic purpuras | 2872 |
| Primary thrombocytopenia unspec | 28730 |
| Immune thrombocytopenic purpura | 28731 |
| Uns thrombocytopenia | 2875 |
| Uns hemorrhagic conditions | 2879 |
| Neutropenia unspecified | 28800 |
| Functional disord neutrophils | 2881 |
| Leukocytopenia unspecified | 28850 |
| Leukocytosis unspecified | 28860 |
| Other disease white blood cells | 2888 |
| Polycythemia secondary | 2890 |
| Ot dis blood/blood forming organs | 28989 |
| Uns dis blood/blood forming organs | 2899 |
| Delirium in other conditions | 2930 |
| Uns schizophrenia | 29590 |
| Depressive type psychosis | 29620 |
| Maj depress dis recurr epi uns | 29630 |
| Maj depress dis recur epi sev | 29633 |
| Bipolar i disorder unspecified | 2967 |
| Bipolar disorder unspecified | 29680 |
| Unspecified psychosis | 2989 |
| Anxiety state unspecified | 30000 |
| Panic disorder wo agoraphobia | 30001 |
| Generalized anxiety disorder | 30002 |
| Dysthymic disorder | 3004 |
| Psychosex dysfunc inhibited excite | 30272 |
| Oth/uns alcohol dependence uns | 30390 |
| Opioid type dependence uns | 30400 |
| Opioid type dependence continuous | 30401 |
| Unspec drug dependence uns | 30490 |
| Alcohol abuse unspec | 30500 |
| Oth mixed/uns drug abuse uns | 30590 |
| Adjustment disorder mixed | 30928 |
| Personality chg due to oth cond | 3101 |
| Depressive disorder other | 311 |
| Obstructive hydrocephalus | 3314 |
| Other acute postoperative pain | 33818 |
| Multiple sclerosis | 340 |
| Encephalopathy unspecified | 34830 |
| Metabolic encephalopathy | 34831 |
| Other visual disturbances | 3688 |
| Uns peripheral vertigo | 38610 |
| Benign paroxysmal position vertigo | 38611 |
| Rheumatic mitral insufficiency | 3941 |
| Mitral stenosis w insufficiency | 3942 |
| Oth/uns mitral valve diseases | 3949 |
| Rheumatic aortic stenosis | 3950 |
| Mitral valve sten aortic valve sten | 3960 |
| Mitral valve insuff aortic v sten | 3962 |
| Mitral valve insuff aortic v insuf | 3963 |
| Uns mitral/aortic valve diseases | 3969 |
| Diseases tricuspid valve | 3970 |
| Malignant essential hypertension | 4010 |
| Malig hyperten heart dis unspec | 40200 |
| Benign hyperten heart dis unspec | 40210 |
| Benign hyp heart dis w ht failure | 40211 |
| Hypertensive heart dis unspec | 40290 |
| Hyperten heart dis w ht failure | 40291 |
| Mal kid hyper w ckd stage i-iv | 40300 |
| Uns kid hyper w ckd stage v-esrd | 40391 |
| Ami oth anterior uns eoc | 41010 |
| Ami subendocardial initial eoc | 41071 |
| Ami uns site uns eoc | 41090 |
| Intermediate coronary syndrome | 4111 |
| Coronary occlusion wo infarction | 41181 |
| Oth forms ischemic heart disease | 41189 |
| Old myocardial infarction | 412 |
| Angina decubitus | 4130 |
| Prinzmetal angina | 4131 |
| Oth/uns angina pectoris | 4139 |
| Coronary athrscler uns vessel | 41400 |
| Atheroscler native coronary art | 41401 |
| Atherosclerosis auto vein graft | 41402 |
| Coronary atheroscl artery bpg | 41404 |
| Coronary atheroscler uns graft | 41405 |
| Aneurysm of heart (wall) | 41410 |
| Other forms chronic ischemic ht dis | 4148 |
| Uns chronic ischemic heart disease | 4149 |
| Iatrogenic pulmonary embolism | 41511 |
| Oth pulmonary embolism/infarction | 41519 |
| Primary pulmonary hypertension | 4160 |
| Oth chronic pulmonary heart disease | 4168 |
| Uns chronic pulmonary heart disease | 4169 |
| Acute/subacute bacterial endocard | 4210 |
| Uns disease pericardium | 4239 |
| Mitral valve disorders | 4240 |
| Aortic valve disorders | 4241 |
| Tricuspid valve disorders nonrheum | 4242 |
| Pulmonary valve disorders | 4243 |
| Endocarditis uns valve/uns cause | 42490 |
| Hypertrophic cardiomyopathy | 4251 |
| Oth primary cardiomyopathies | 4254 |
| Uns secondary cardiomyopathy | 4259 |
| Atrioventricular block complete | 4260 |
| Uns atrioventricular block | 42610 |
| First degree atrioventricular block | 42611 |
| Mobitz ii atrioventricular block | 42612 |
| Oth second degree av block | 42613 |
| Left bundle branch hemiblock | 4262 |
| Oth left bundle branch block | 4263 |
| Right bundle branch block | 4264 |
| Uns bundle branch block | 42650 |
| Right bbb/left anterior fasc block | 42652 |
| Other bilateral bundle branch block | 42653 |
| Other conduction disorders | 42689 |
| Paroxysmal supravent tachycardia | 4270 |
| Paroxysmal ventricular tachycardia | 4271 |
| Uns paroxysmal tachycardia | 4272 |
| Atrial fibrillation | 42731 |
| Atrial flutter | 42732 |
| Cardiac arrest | 4275 |
| Uns premature beats | 42760 |
| Supraventricular premature beats | 42761 |
| Oth premature beats | 42769 |
| Sinoatrial node dysfunction | 42781 |
| Other cardiac dysrhythmias | 42789 |
| Uns cardiac dysrhythmia | 4279 |
| Congestive heart failure unspec | 4280 |
| Left heart failure | 4281 |
| Unspec systolic heart failure | 42820 |
| Acute systolic heart failure | 42821 |
| Chronic systolic heart failure | 42822 |
| Unspec diastolic heart failure | 42830 |
| Chronic diastolic heart failure | 42832 |
| Ac/chron diastolic heart failure | 42833 |
| Uns heart failure | 4289 |
| Myocardial degeneration | 4291 |
| Cardiovascular disease unspecified | 4292 |
| Cardiomegaly | 4293 |
| Other ill-defined heart diseases | 42989 |
| Heart disease unspecified | 4299 |
| Subarachnoid hemorrhage | 430 |
| Intracerebral hemorrhage | 431 |
| Subdural hemorrhage | 4321 |
| Occlusion carotid artery wo infarct | 43310 |
| Occlusion carotid artery w infarct | 43311 |
| Occlusion vertebral artery wo infar | 43320 |
| Occlus mult bilat precer art wo inf | 43330 |
| Uns cer art occlusion wo cer infarc | 43490 |
| Uns cer artery occlusion w cer inf | 43491 |
| Vertebral artery syndrome | 4351 |
| Other transient cerebral ischemias | 4358 |
| Uns transient cerebral ischemia | 4359 |
| Acute ill defined cv disease | 436 |
| Cerebral atherosclerosis | 4370 |
| Oth generalized ischemic cv disease | 4371 |
| Cerebral aneurysm nonruptured | 4373 |
| Uns cerebrovascular disease | 4379 |
| Vertigo | 43885 |
| Uns late effects cv disease | 4389 |
| Atherosclerosis aorta | 4400 |
| Atherosclerosis renal artery | 4401 |
| Uns atherosclerosis extremities | 44020 |
| Atheroscler ext w intermittent cl | 44021 |
| Atherosclerosis ext w rest pain | 44022 |
| Generalized/uns atherosclerosis | 4409 |
| Thoracic aortic aneurysm worupture | 4412 |
| Abdominal aortic aneurysm worupture | 4414 |
| Aortic aneurysm uns site | 4419 |
| Raynaud's syndrome | 4430 |
| Embolism arteries lower extremity | 44422 |
| Wegener's granulomatosis | 4464 |
| Giant cell arteritis | 4465 |
| Stricture artery | 4471 |
| Other disorders arteries/arterioles | 4478 |
| Uns disorders arteries/arterioles | 4479 |
| Embolism/thrombosis inf vena cava | 4532 |
| Ac emb/throm uns deep ves lower ext | 45340 |
| Embolism/thrombosis uns site | 4539 |
| Orthostatic hypotension | 4580 |
| Hypotension unspecified | 4589 |
| Hemorrhage unspecified | 4590 |
| Other disorders circulatory system | 45989 |
| Acute pharyngitis | 462 |
| Acute upper resp infect oth sites | 4658 |
| Acute upper resp infections uns | 4659 |
| Acute bronchitis | 4660 |
| Pneumonia adenovirus | 4800 |
| Pneumonia respiratory syncy virus | 4801 |
| Uns viral pneumonia | 4809 |
| Pneumococcal pneumonia | 481 |
| Pneumonia other bacteria | 48289 |
| Uns bacterial pneumonia | 4829 |
| Bronchopneumonia organism unspec | 485 |
| Pneumonia organism unspecified | 486 |
| Influenza with pneumonia | 4870 |
| Influenza w oth respiratory manif | 4871 |
| Bronchitis unspecified | 490 |
| Simple chronic bronchitis | 4910 |
| Obstruct chron bronchitis wo exac | 49120 |
| Obstruct chron bronchitis w exac | 49121 |
| Obst chr bronchitis w ac bronchitis | 49122 |
| Emphysematous bleb | 4920 |
| Other emphysema | 4928 |
| Extrinsic asthma unspecified | 49300 |
| Ex asthma w exacerbation | 49302 |
| Intrinsic asthma unspecified | 49310 |
| Chron obstructive asthma unspecif | 49320 |
| Chronic obst asthma w status asthm | 49321 |
| Chronic obstruct asthma w exacer | 49322 |
| Asthma unspecified | 49390 |
| Uns asthma w status asthmaticus | 49391 |
| Asthma unspec w exacerbation | 49392 |
| Bronchiectasis wo acute exacerb | 4940 |
| Bronchiectasis w acute exacerb | 4941 |
| Chronic airway obstruction other | 496 |
| Asbestosis | 501 |
| Pneumonitis inhalation food | 5070 |
| Pleurisy woeffusion/current tb | 5110 |
| Other effusion not tuberculous | 5118 |
| Unspecif pleural effusion | 5119 |
| Iatrogenic pneumothorax | 5121 |
| Other pneumothorax and air leak | 5128 |
| Pulmonary congestion/hypostasis | 514 |
| Postinflammatory pulmonary fibrosis | 515 |
| Idiopathic interstitial pneumonia | 5163 |
| Other alveolar pneumonopathy | 5168 |
| Uns alveolar pneumonopathy | 5169 |
| Pulmonary collapse | 5180 |
| Pulmonary eosinophilia | 5183 |
| Uns acute edema lung | 5184 |
| Pulmonary insuffic trauma surgery | 5185 |
| Respiratory failure | 51881 |
| Oth pulmonary insufficiency other | 51882 |
| Oth diseases lung other | 51889 |
| Acute bronchospasm | 51911 |
| Oth diseases trachea/bronchus | 51919 |
| Disorders diaphragm | 5194 |
| Oth diseases respiratory system | 5198 |
| Uns disease respiratory system | 5199 |
| Uns esophagitis | 53010 |
| Reflux esophagitis | 53011 |
| Oth esophagitis | 53019 |
| Esophageal reflux | 53081 |
| Acute gastritis wohemorrhage | 53500 |
| Diaphragmatic hernia | 5533 |
| Uns ulcerative colitis | 5569 |
| Hemorrhage rectum/anus | 5693 |
| Acute pancreatitis | 5770 |
| Hematemesis | 5780 |
| Uns hemorr gastrointestinal tract | 5789 |
| Celiac disease | 5790 |
| Uns acute kidney failure | 5849 |
| End stage renal disease | 5856 |
| Diffuse cystic mastopathy | 6101 |
| Mastodynia | 61171 |
| Lump or mass in breast | 61172 |
| Oth signs/symptoms in breast | 61179 |
| Postmenopausal bleeding | 6271 |
| Lupus erythematosus | 6954 |
| Psoriatic arthropathy | 6960 |
| Oth psoriasis | 6961 |
| Systemic lupus erythematosus | 7100 |
| Systemic sclerosis | 7101 |
| Sicca syndrome | 7102 |
| Uns diffuse connect tissue disease | 7109 |
| Pyogenic arthritis shoulder | 71101 |
| Rheumatoid arthritis | 7140 |
| Rheumatoid arthritis visceral/syst | 7142 |
| Uns inflammatory polyarthropathy | 7149 |
| Uns polyarthrit/arthropth site uns | 71650 |
| Effusion of joint shoulder | 71901 |
| Pain in joint site uns | 71940 |
| Pain in joint shoulder | 71941 |
| Degenerat thoracic iv disc | 72251 |
| Oth syndromes affecting cervical | 7238 |
| Pain in thoracic spine | 7241 |
| Uns thoracic/lumb neuritis/radicul | 7244 |
| Backache unspecified | 7245 |
| Oth symptoms referable to back | 7248 |
| Polymyalgia rheumatica | 725 |
| Oth affections shoulder region | 7262 |
| Muscle weakness | 72887 |
| Rhabdomyolysis | 72888 |
| Rheumatism uns/fibrositis | 7290 |
| Uns myalgia/myositis | 7291 |
| Pain in limb | 7295 |
| Swelling limb | 72981 |
| Acute osteomyelitis oth sites | 73008 |
| Uns osteomyelitis site uns | 73020 |
| Uns osteomyelitis oth sites | 73028 |
| Pathological fracture vertebrae | 73313 |
| Kyphosis | 73710 |
| Scoliosis oth conditions | 73743 |
| Acquired deformity chest/rib | 7383 |
| Oth acquired deformity back/spine | 7385 |
| Ostium secundum at/septal defect | 7455 |
| Congenital mitral insufficiency | 7466 |
| Coronary artery anomaly | 74685 |
| Other anomalies heart | 74689 |
| Uns anomaly heart | 7469 |
| Atresia/stenosis aorta | 74722 |
| Oth anomalies aorta | 74729 |
| Uns anomaly lung | 74860 |
| Anomalies diaphragm | 7566 |
| Transient alteration awareness | 78002 |
| Oth alteration consciousness | 78009 |
| Syncope and collapse | 7802 |
| Dizziness and giddiness | 7804 |
| Fever | 7806 |
| Fever unspecified | 78060 |
| Chronic fatigue syndrome | 78071 |
| Other malaise and fatigue | 78079 |
| Memory loss | 78093 |
| Altered mental status | 78097 |
| Localized superficial swelling | 7822 |
| Edema | 7823 |
| Spontaneous ecchymoses | 7827 |
| Loss of weight | 78321 |
| Headache | 7840 |
| Swelling/mass/lump in head/neck | 7842 |
| Epistaxis | 7847 |
| Tachycardia unspecified | 7850 |
| Palpitations | 7851 |
| Undiagnosed cardiac murmurs | 7852 |
| Other abnormal heart sounds | 7853 |
| Other shock without trauma | 78559 |
| Enlargement of lymph nodes | 7856 |
| Other cardiovascular symptoms | 7859 |
| Respiratory abnormality unspec | 78600 |
| Hyperventilation | 78601 |
| Orthopnea | 78602 |
| Apnea | 78603 |
| Shortness breath | 78605 |
| Tachypnea | 78606 |
| Wheezing | 78607 |
| Respiratory abnormality ot | 78609 |
| Cough | 7862 |
| Hemoptysis | 7863 |
| Hemoptysis unspecified | 78630 |
| Unspec chest pain | 78650 |
| Precordial pain | 78651 |
| Painful respiration | 78652 |
| Other chest pain | 78659 |
| Swelling/mass/lump in chest | 7866 |
| Abnormal chest sounds | 7867 |
| Other respiratory symptoms | 7869 |
| Dysphagia | 7872 |
| Dysphagia unspecified | 78720 |
| Abdominal pain uns site | 78900 |
| Abdom pain r upper quad | 78901 |
| Abdom pain l upper quad | 78902 |
| Abdom pain r lower quad | 78903 |
| Abdominal pain periumbilic | 78905 |
| Abdominal pain epigastric | 78906 |
| Abdominal pain generalized | 78907 |
| Abdominal pain other site | 78909 |
| Abdom/pelvic swelling unsp site | 78930 |
| Other ascites | 78959 |
| Oth abnormality red blood cells | 79009 |
| Elevated sedimentation rate | 7901 |
| Other abnormal glucose | 79029 |
| Oth abnormal blood chemistry | 7906 |
| Bacteremia | 7907 |
| Abnormal arterial blood gases | 79091 |
| Elevated c-reactive protein | 79095 |
| Abnormal findings lung field | 7931 |
| Abnormal findings lung field other | 79319 |
| Abnormal fd intrathor org ot | 7932 |
| Unsp abnormal mammogram | 79380 |
| Mammographic microcalcification | 79381 |
| Ot abnormal radiolog exam breast | 79389 |
| Abnormal pulmonary func study | 7942 |
| Abnormal cardiovasc study unspec | 79430 |
| Abnorm electrocardiogram | 79431 |
| Abnormal cardiovasc study ot | 79439 |
| Nonspecific reaction tb test | 7955 |
| Other abnormal tumor markers | 79589 |
| Hypoxemia | 79902 |
| Symptoms involv emotional state | 7992 |
| Fracture cervical vert unsp cl | 80500 |
| Fracture c2 vertebra closed | 80502 |
| Fracture c3 vertebra closed | 80503 |
| Fracture c4 vertebra closed | 80504 |
| Fracture c5 vertebra closed | 80505 |
| Fracture c6 vertebra closed | 80506 |
| Fracture c7 vertebra closed | 80507 |
| Fracture mult cervical vert cl | 80508 |
| Fracture dorsal vertebra close | 8052 |
| Fracture lumbar vertebra close | 8054 |
| Vertebral fracture unsp closed | 8058 |
| C1-c4 fracture clos/cord inj unsp | 80600 |
| C5-c7 fracture clos/cord inj unsp | 80605 |
| Closed fracture rib(s) uns | 80700 |
| Closed fracture one rib | 80701 |
| Closed fracture two ribs | 80702 |
| Closed fracture multiple ribs uns | 80709 |
| Closed fracture uns part clavicle | 81000 |
| Fracture gr tuberos humerus closed | 81203 |
| Disloc shoulder unsp closed | 83100 |
| Traum subarachnoid hemorrage | 85200 |
| Traumatic subdural hemorrage | 85220 |
| Traumatic brain hemorrage ot | 85300 |
| Intracranial injury ot | 85400 |
| Traumatic pneumothorax wo open wd | 8600 |
| Lung contusion wo open wound | 86121 |
| Contusion face/scalp/nck | 920 |
| Contusion of chest wall | 9221 |
| Contusion of shoulder region | 92300 |
| Contusion of uns site | 9249 |
| C1-c4 inj w central cord syndrome | 95203 |
| Uns head injury | 95901 |
| Injury face/neck | 95909 |
| Other injury of chest wall | 95911 |
| Other injury of abdomen | 95912 |
| Other injury other sites of trunk | 95919 |
| Oth/uns injury shoulder/upper arm | 9592 |
| Injury other sites inc mult sites | 9598 |
| Injury uns site | 9599 |
| Poisoning anticoagulants | 9642 |
| Other/unspec adverse effect drug | 9952 |
| Unspec adverse effect drug | 99520 |
| Other adverse effect drug | 99529 |
| Sepsis | 99591 |
| Malfunction cardiac pacemake | 99601 |
| Malfunction vasc device/graf | 9961 |
| Complication renal dialy dev | 99673 |
| Complication heart transplant | 99683 |
| Complication lung transplant | 99684 |
| Surg complication heart | 9971 |
| Hematoma complication proced | 99812 |
| Accidental op laceration | 9982 |
| Other postop infection | 99859 |
| Traffic acc nos-pers nos | E8199 |
| Acc cut/hem in surgery | E8700 |
| Abn react-surg proc nec | E8788 |
| Fall from slipping nec | E8859 |
| Fall nec | E8888 |
| Fall nos | E8889 |
| Accident nos | E9289 |
| Adv eff antineoplastic | E9331 |
| Adv eff antilipemics | E9422 |
| Contact/exposure to tb | V011 |
| History malignancy large intestine | V1005 |
| History malignancy bronchus/lung | V1011 |
| History malignancy breast | V103 |
| History malignancy prostate | V1046 |
| History malignancy bladder | V1051 |
| History other malignancy skin | V1083 |
| History tuberculosis | V1201 |
| History unsp circulatory disease | V1250 |
| History venous thrombosis/embolism | V1251 |
| History tia/stroke wo residual def | V1254 |
| History pneumonia | V1261 |
| History surgery heart/great vessels | V151 |
| History exposure to asbestos | V1584 |
| History exposure hazard body fluid | V1585 |
| History of fall | V1588 |
| Kidney replaced by transplant | V420 |
| Heart replaced by transplant | V421 |
| Lung replaced by transplant | V426 |
| Liver replaced by transplant | V427 |
| Heart valve replaced by oth means | V433 |
| Cardiac pacemaker in situ | V4501 |
| Implantable cardiac defib in situ | V4502 |
| Renal dialysis status | V451 |
| Renal dialysis status | V4511 |
| Aortocoronary bypass status | V4581 |
| Perc trans cor angioplasty status | V4582 |
| Other cardiorespiratory problems | V472 |
| Fitting/adjust pacemaker | V5331 |
| Fitting/adjust impl defibrillator | V5332 |
| Removal int fixation device | V5401 |
| Encounter for extracorp dialysis | V560 |
| Antineoplastic chemotherapy | V5811 |
| Aftercare follow organ transplant | V5844 |
| Encounter long term use oth drugs | V5869 |
| Fitting/adjust vascular catheter | V5881 |
| Fitting/adjust nonvascular cath | V5882 |
| Enctr therap drug monitoring | V5883 |
| Follow-up after tx high risk drug | V6751 |
| Observ suspected malignant neoplasm | V711 |
| Observ suspected tb | V712 |
| Observ following oth accident | V714 |
| Observ suspected cardiovascular dis | V717 |
| Screening for pulmonary tb | V741 |
| Screening mammogram ot | V7612 |
| Special screening mal neo ot | V7649 |
| Screening for defic anemia ot | V781 |

# Don't perform preoperative cardiac tests for low-risk, non-cardiac surgeries

*Choosing Wisely Guidelines*

| **American College of Cardiology** | Don’t perform stress cardiac imaging or advanced non-invasive imaging as a pre-operative assessment in patients scheduled to undergo low-risk non-cardiac surgery. Non-invasive testing is not useful for patients undergoing low-risk non-cardiac surgery (e.g., cataract removal). These types of tests do not change the patient’s clinical management or outcomes and will result in increased costs. |
| --- | --- |
| **American College of Physicians** | Don’t obtain preoperative chest radiography in the absence of a clinical suspicion for intrathoracic pathology. In the absence of cardiopulmonary symptoms, preoperative chest radiography rarely provides any meaningful changes in management or improved patient outcomes. |
| **American College of Radiology** | Avoid admission or preoperative chest x-rays for ambulatory patients with unremarkable history and physical exam. Performing routine admission or preoperative chest x-rays is not recommended for ambulatory patients without specific reasons suggested by the history and/or physical examination findings. Only 2 percent of such images lead to a change in management. Obtaining a chest radiograph is reasonable if acute cardiopulmonary disease is suspected or there is a history of chronic stable cardiopulmonary disease in a patient older than age 70 who has not had chest radiography within six months |
| **American College of Surgeons** | Avoid admission or preoperative chest X rays for ambulatory patients with unremarkable history and physical exam. Performing routine admission or preoperative chest X rays is not recommended for ambulatory patients without specific reasons suggested by the history and/or physical examination findings. Only 2 percent of such images lead to a change in management. Obtaining a chest radiograph is reasonable if acute cardiopulmonary disease is suspected or there is a history of chronic stable cardiopulmonary diseases in patients older than age 70 who have not had chest radiography within six months. |
| **American Society of Anesthesiologists** | Don’t obtain baseline diagnostic cardiac testing (trans-thoracic/esophageal echocardiography – TTE/TEE) or cardiac stress testing in asymptomatic stable patients with known cardiac disease (e.g., CAD, valvular disease) undergoing low or moderate risk non-cardiac surgery. Advances in cardiovascular medical management, particularly the introduction of perioperative beta-blockade and improvements in surgical and anesthetic techniques, have significantly decreased operative morbidity and mortality rates in noncardiac surgery. Surgical outcomes continue to improve causing the mortality rate of major surgeries to be low and the need for revascularization minimal. Consequently, the role of preoperative cardiac stress testing has been reduced to the identification of extremely high-risk patients, for instance, those with significant left main disease for which preoperative revascularization would be beneficial regardless of the impending procedure. In other words, testing may be appropriate if the results would change management prior to surgery, could change the decision of the patient to undergo surgery, or change the type of procedure that the surgeon will perform. |
| **American Society of Echocardiography** | Avoid echocardiograms for preoperative/perioperative assessment of patients with no history or symptoms of heart disease. Perioperative echocardiography is used to clarify signs or symptoms of cardiovascular disease, or to investigate abnormal heart tests. Resting left ventricular (LV) function is not a consistent predictor of perioperative ischemic events; even reduced LV systolic function has poor predictive value for perioperative cardiac events. |
| **American Society of Nuclear Cardiology** | Don’t perform cardiac imaging as a preoperative assessment in patients scheduled to undergo low- or intermediate-risk non-cardiac surgery. Non-invasive testing is not useful for patients undergoing low-risk non-cardiac surgery or with no cardiac symptoms or clinical risk factors undergoing intermediate-risk non-cardiac surgery. These types of testing do not change the patient’s clinical management or outcomes and will result in increased costs. Therefore, it is not appropriate to perform cardiac imaging procedures for non-cardiac surgery risk assessment in patients with no cardiac symptoms, clinical risk factors or who have moderate to good functional capacity. |
| **Society of Cardiovascular Computed Tomography** | Don’t order coronary artery calcium scoring for preoperative evaluation for any surgery, irrespective of patient risk. No evidence exists to support the diagnostic or prognostic potential of coronary artery calcium scoring in individuals in the preoperative setting. This practice may add costs and confound professional guideline-based evaluations |
| **Society of General Internal Medicine** | Don’t perform routine pre-operative testing before low-risk surgical procedures. Pre-operative assessment is expected before all surgical procedures. This assessment includes an appropriately directed and sufficiently comprehensive history and physical examination, and, in some cases, properly includes laboratory and other testing to help direct management and assess surgical risk. However, pre-operative testing for low-risk surgical procedures (such as cataract extraction) results in unnecessary delays and adds to significant avoidable costs and should be eliminated. |
| **Society of Thoracic Surgeons** | Patients who have no cardiac history and good functional status do not require preoperative stress testing prior to non-cardiac thoracic surgery. Functional status has been shown to be reliable for prediction of perioperative and long-term cardiac events. In highly functional asymptomatic patients, management is rarely changed by preoperative stress testing. It is therefore appropriate to proceed with the planned surgery without it. Unnecessary stress testing can be harmful because it increases the cost of care and delays treatment without altering surgical or perioperative management in a meaningful way. Furthermore, low-risk patients who undergo preoperative stress testing are more likely to obtain additional invasive testing with risks of complications. Cardiac complications are significant contributors to morbidity and mortality after non-cardiac thoracic surgery, and it is important to identify patients preoperatively who are at risk for these complications. The most valuable tools in this endeavor include a thorough history, physical exam and resting EKG. Cardiac stress testing can be an important adjunct in this evaluation, but it should only be used when clinically indicated. |
| **Society for Vascular Medicine** | Avoid cardiovascular testing for patients undergoing low-risk surgery. Pre-operative stress testing does not alter therapy or decision-making in patients facing low-risk surgery. |

*Methods*

We calculated the percent of Medicare beneficiaries over age 65 who received a non-indicated electrocardiogram, cardiovascular stress test (including stress imaging), echocardiogram, chest x-ray, or advanced cardiac imaging (CT, MRI, PET) in the 30 days before low-risk, non-cardiac in each calendar year 2006-11. We then created a weighted average of testing prevalence for the interval 2006-11. We identified low-risk, non-cardiac surgeries using the following BETOS codes: P1A (Major Procedure – Breast), P1D (Major Procedure – TURP), P1F (Major Procedure - Explor/Decompr/ExcisDisc), P4A (Eye Procedures - Corneal Transplant), P5C (Ambulatory Procedures - Inguinal Hernia Repair), P5D (Ambulatory Procedures – Lithotripsy), P8A (Endoscopy – Arthroscopy), P8G (Endoscopy - Lararoscopic Cholecystectomy). We required enrollment in fee-for-service Medicare Parts A and B for at least 11 months during the calendar year. We did not count testing events if diagnosis codes in any of the first four fields on a claim involved cardiac disease, cardiac-related symptoms, or any conditions that might justify the test (e.g., respiratory conditions, cancer), and we excluded beneficiaries who were admitted in the 30 days before the surgery.

*References*

Physician Quality Reporting System (PQRS) Measure Specifications Manual for Claims and Registry Reporting of Individual Measures. Centers for Medicare and Medicaid Services. 2014.

*CPT Codes for Identifying Cardiac Tests (Advanced Imaging, Cardiac Stress Tests, Echocardiograms, and Electrocardiograms)*

See codes applied to [cardiac testing measure](#_Don't_order_cardiac_1) (pp. 7).

*CPT Codes for Identifying Chest X-Rays*

See codes applied to [preoperative cardiac testing (cataract surgery)](#_Don't_perform_preoperative_3) (pp. 77).

*ICD-9 Codes for Excluding Cardiac Tests (Advanced Imaging, Cardiac Stress Tests, Chest X-Rays, Echocardiograms, and Electrocardiograms)*

See codes applied to [preoperative cardiac testing (cataract surgery)](#_Don't_perform_preoperative_4) (pp. 77).

# Don’t perform population based screening for 25-OH-Vitamin D deficiency

*Choosing Wisely Guidelines*

| **American Society for Clinical Pathology** | Don’t perform population based screening for 25-OH-Vitamin D deficiency. Vitamin D deficiency is common in many populations, particularly in patients at higher latitudes, during winter months and in those with limited sun exposure. Over the counter Vitamin D supplements and increased summer sun exposure are sufficient for most otherwise healthy patients. Laboratory testing is appropriate in higher risk patients when results will be used to institute more aggressive therapy (e.g., osteoporosis, chronic kidney disease, malabsorption, some infections, obese individuals). |
| --- | --- |
| **Endocrine Society and American Association of Clinical Endocrinologists** | Don’t routinely measure 1,25-dihydroxyvitamin D unless the patient has hypercalcemia or decreased kidney function. Many practitioners become confused when ordering a vitamin D test. Because 1,25-dihydroxyvitamin D is the active form of vitamin D, many practitioners think that measuring 1,25-dihydroxyvitamin D is an accurate means to estimate vitamin D stores and test for vitamin D deficiency, which is incorrect. Current Endocrine Society guidelines recommend screening for vitamin D deficiency in individuals at risk for deficiency. Serum levels of 1,25-dihyroxyvitamin D have little or no relationship to vitamin D stores but rather are regulated primarily by parathyroid hormone levels, which in turn are regulated by calcium and/or vitamin D. In vitamin D deficiency, 1,25-dihydroxyvitamin D levels go up, not down. Unregulated production of 1,25-dihydroxyvitamin D (i.e., sarcoidosis, granulomatous diseases) is an uncommon cause of hypercalcemia; this should be suspected if blood calcium levels are high and parathyroid hormone levels are low and confirmed by measurement of 1,25-dihydroxyvitamin D. The enzyme that activates vitamin D is produced in the kidney, so blood levels of 1,25-dihydroxyvitamin D are sometimes of interest in patients on dialysis or with end-stage kidney disease. There are few other circumstances, if any, where 1,25-dihydroxyvitamin D testing would be helpful. Serum 25-hydroxyvitamin D levels may be overused, but when trying to assess vitamin D stores or diagnose vitamin D deficiency (or toxicity), 25-hydroxyvitamin D is the correct test. |

*Methods*

We calculated the proportion of Medicare beneficiaries over age 65 that received at least one vitamin D screening test for each calendar year 2006-11. We then created a weighted average of testing prevalence for the interval 2006-11. We required enrollment in fee-for-service Medicare Parts A and B for at least 11 months in each calendar year. We excluded beneficiaries for whom a vitamin D screening test might be indicated, requiring at least two physician claims or one acute hospital claim for the relevant diagnoses. Exclusionary diagnoses included chronic kidney disease, osteoporosis, fragility fractures, and obesity. Fragility fractures were defined as follows: (i) at least one CPT code for hip fracture repair; (ii) at least one diagnosis code for distal radius or proximal humerus fracture, plus at least one upper extremity radiography claim within seven days (plus or minus) of the diagnosis claim date; or (iii) at least one ICD-9 diagnosis code for vertebral fracture.

*CPT Codes for Identifying Vitamin D Screening Tests*

| **Labels** | **Codes** |
| --- | --- |
| Assay of Vitamin D; 25 hydroxy, includes fraction(s), if performed | 82306 |
| Assay of Calciferol (Vitamin D) | 82307 |
| Assay of Vitamin D | 82562 |

*ICD-9 Codes for Excluding High-Risk Beneficiaries*

| **Labels** | **Codes** |
| --- | --- |
| Chronic kidney disease | 585.x |
| Hypertensive chronic kidney disease | 403.x |
| Hypertensive heart and chronic kidney disease | 404.x |
| Secondary diabetes mellitus with renal manifestations | 249.4 |
| Diabetic nephropathy NOS | 583.81 |
| Diabetic nephrosis | 581.81 |
| Diabetes with renal manifestations | 250.4 |
| Renal dialysis status | V451, V4511, V4512 |
| Aftercare involving intermittent extracorporeal dialysis | V560 |
| Aftercare involving intermittent other dialysis | V568 |
| Osteoporosis | 7330, 73300, 73301, 73302, 73303, 73309, V8281 |
| Obesity | 278, 278.0x, V77.8 |

*ICD-9 and CPT Codes for Identifying Fragility Fractures.*

| **Label** | **Code** |
| --- | --- |
| Hip fracture | CPT 27230-27248 |
| Wrist fracture | ICD-9 813.4-813.54, 814.00, 814.10 and CPT 25600, 25605, 25609, 25611 |
| Humerus fracture | ICD-9 812.0-812.19 and CPT 23600-23630, 23665-23680 |
| Vertebral fracture | ICD-9 805.2. 805.4, 805.8, 733.13 |
| Shoulder/clavicle imaging | CPT 73000, 73010, 73020, 73030, 73040, 73050 |
| Humerus/elbow imaging | CPT 73060, 73070, 73080, 73085 |
| Forearm/wrist imaging | CPT 73090, 73092, 73100, 73110, 73115 |
| Hand imaging | CPT 73120, 73130, 73140 |
| CT | CPT 73200, 73201, 73202, 73206 |
| MRI | CPT 73218, 73219, 73220, 73221, 73222, 73223, 73225 |

# Don’t use antipsychotics as first choice to treat behavioral and psychological symptoms of dementia

*Choosing Wisely Guidelines*

| **American Medical Directors Association** | Don’t prescribe antipsychotic medications for behavioral and psychological symptoms of dementia (BPSD) in individuals with dementia without an assessment for an underlying cause of the behavior. Careful differentiation of cause of the symptoms (physical or neurological versus psychiatric, psychological) may help better define appropriate treatment options. The therapeutic goal of the use of antipsychotic medications is to treat patients who present an imminent threat of harm to self or others, or are in extreme distress – not to treat nonspecific agitation or other forms of lesser distress. Treatment of BPSD in association with the likelihood of imminent harm to self or others includes assessing for and identifying and treating underlying causes (including pain; constipation; and environmental factors such as noise, being too cold or warm, etc.), ensuring safety, reducing distress and supporting the patient’s functioning. If treatment of other potential causes of the BPSD is unsuccessful, antipsychotic medications can be considered, taking into account their significant risks compared to potential benefits. When an antipsychotic is used for BPSD, it is advisable to obtain informed consent. |
| --- | --- |
| **American Geriatrics Society** | Don’t use antipsychotics as first choice to treat behavioral and psychological symptoms of dementia. People with dementia often exhibit aggression, resistance to care and other challenging or disruptive behaviors. In such instances, antipsychotic medicines are often prescribed, but they provide limited benefit and can cause serious harm, including stroke and premature death. Use of these drugs should be limited to cases where non-pharmacologic measures have failed and patients pose an imminent threat to themselves or others. Identifying and addressing causes of behavior change can make drug treatment unnecessary. |
| **American Psychiatric Association** | Don’t use antipsychotics as first choice to treat behavioral and psychological symptoms of dementia. Behavioral and psychological symptoms of dementia are defined as the non-cognitive symptoms and behaviors, including agitation or aggression, anxiety, irritability, depression, apathy and psychosis. Evidence shows that risks (e.g., cerebrovascular effects, mortality, parkinsonism or extrapyramidal signs, sedation, confusion and other cognitive disturbances, and increased body weight) tend to outweigh the potential benefits of antipsychotic medications in this population. Clinicians should limit the use of antipsychotic medications to cases where non-pharmacologic measures have failed and the patients’ symptoms may create a threat to themselves or others. This item is also included in the American Geriatric Society’s list of recommendations for “Choosing Wisely.” |

*Methods*

We calculated the percent of Medicare beneficiaries over age 65 with diagnosed dementia and without a severe mental illness who filled at least one antipsychotic in the interval 2006-11. We required enrollment in fee-for-service Medicare Parts A, B, and D, and weighted our analysis by beneficiary enrollment in Part D. Beneficiaries were classified as having a severe mental illness if they had at least one claim-level diagnosis for a severe mental illness during the study period. Beneficiaries were classified as having dementia if they had at least two physician or two acute hospital claims for dementia. Antipsychotic prescription fills were only counted if they occurred after the second (confirmed) dementia diagnosis.

*References*

Gruber-Baldini AL, Stuart B, Zuckerman IH, Simoni-Wastila L, Miller R. Treatment of dementia in community-dwelling and institutionalized medicare beneficiaries. Journal of the American Geriatrics Society. 2007;55(10):1508-16. doi:10.1111/j.1532-5415.2007.01387.x

Rattinger GB, Burcu M, Dutcher SK, Chhabra PT, Rosenberg PB, Simoni-Wastila L, et al. Pharmacotherapeutic management of dementia across settings of care. Journal of the American Geriatrics Society. 2013;61(5):723-33. doi:10.1111/jgs.12210

*ICD-9 Codes for Identifying Dementia*

| **Label** | **Code** |
| --- | --- |
| Dementias | 290.0 |
| Senile dementia, uncomplicated | 290.0 |
| Presenile dementia | 290.1 |
| Presenile dementia, uncomplicated | 290.10 |
| Presenile dementia with delirium | 290.11 |
| Presenile dementia with delusional features | 290.12 |
| Presenile dementia with depressive features | 290.13 |
| Senile dementia with delusion or depressive features | 290.2 |
| Senile dementia with delusional features | 290.20 |
| Senile dementia with depressive features | 290.21 |
| Senile dementia with delirium | 290.3 |
| Vascular dementia | 290.4 |
| Vascular dementia, uncomplicated | 290.40 |
| Vascular dementia with delirium | 290.41 |
| Vascular dementia with delusions | 290.42 |
| Vascular dementia with depressed mood | 290.43 |
| Alcohol induced persisting dementia | 291.2 |
| Dementia in conditions classified elsewhere | 294.1 |
| Dementia in conditions classified elsewhere without behavioral disturbance | 294.10 |
| Dementia in conditions classified elsewhere with behavioral disturbance | 294.11 |
| Alzheimer’s disease | 331.0 |
| Frontotemporal dementia | 331.1 |
| Pick's disease of the brain | 331.11 |
| Frontal dementia | 331.19 |
| Senile degeneration of the brain | 331.2 |
| Cerebral degeneration in dx classified elsewhere | 331.7 |
| Dementia with Lewy bodies / Parkinsonism | 331.82 |

*ICD-9 Codes for Identifying Severe Mental Illness*

| **Label** | **Code** |
| --- | --- |
| Schizophrenic disorders | 295.0-295.9 |
| Bipolar disorders | 296.0, 296.1, 296.4-296.8 |
| Delusion disorders | 297.1-297.3, 297.8 |
| Other non-organic psychoses | 298.3, 298.4 |

*Drug Codes for Identifying Antipsychotic Prescriptions*

| **Label** | **Code** |
| --- | --- |
| Perphenazine | d00855 |
| Fluphenazine | d00237 |
| Haloperidol | d00027 |
| Loxapine | d00897 |
| Mesoridazine | d00889 |
| Methotrimeprazine | d00814 |
| Molindone | d00896 |
| Pimozide | d00898 |
| Thioridazine | d00389 |
| Thiothixene | d00391 |
| Trifluoperazine | d00890 |
| Clozapine | d00199 |
| Risperidone | d03180 |
| Olanzapine | d04050 |
| Quetiapine | d04220 |
| Ziprasidone | d04747 |
| Aripiprazole | d04825 |
| Paliperidone | d06297 |
| Iloperidone | d07441 |
| Asenapine | d07473 |
| Lurasidone | d07705 |

# Don’t recommend percutaneous feeding tubes in patients with advanced dementia

*Choosing Wisely Guidelines*

| **American Academy of Hospice and Palliative Medicine** | Don’t recommend percutaneous feeding tubes in patients with advanced dementia; instead, offer oral assisted feeding. In advanced dementia, studies have found feeding tubes do not result in improved survival, prevention of aspiration pneumonia, or improved healing of pressure ulcers. Feeding tube use in such patients has actually been associated with pressure ulcer development, use of physical and pharmacological restraints, and patient distress about the tube itself. Assistance with oral feeding is an evidence-based approach to provide nutrition for patients with advanced dementia and feeding problems; in the final phase of this disease, assisted feeding may focus on comfort and human interaction more than nutritional goals. |
| --- | --- |
| **American Geriatrics Society** | Don’t recommend percutaneous feeding tubes in patients with advanced dementia; instead offer oral assisted feeding. In advanced dementia, studies have found feeding tubes do not result in improved survival, prevention of aspiration pneumonia, or improved healing of pressure ulcers. Feeding tube use in such patients has actually been associated with pressure ulcer development, use of physical and pharmacological restraints, and patient distress about the tube itself. Assistance with oral feeding is an evidence-based approach to provide nutrition for patients with advanced dementia and feeding problems; in the final phase of this disease, assisted feeding may focus on comfort and human interaction more than nutritional goals. |
| **American Medical Directors Association** | Don’t insert percutaneous feeding tubes in individuals with advanced dementia. Instead, offer oral assisted feedings. Strong evidence exists that artificial nutrition does not prolong life or improve quality of life in patients with advanced dementia. Substantial functional decline and recurrent or progressive medical illnesses may indicate that a patient who is not eating is unlikely to obtain any significant or long-term benefit from artificial nutrition. Feeding tubes are often placed after hospitalization, frequently with concerns for aspirations, and for those who are not eating. Contrary to what many people think, tube feeding does not ensure the patient’s comfort or reduce suffering; it may cause fluid overload, diarrhea, abdominal pain, local complications, less human interaction and may increase the risk of aspiration. Assistance with oral feeding is an evidence-based approach to provide nutrition for patients with advanced dementia and feeding problems. |

*Methods*

We calculated the percent of Medicare beneficiaries over age 65 institutionalized with advanced dementia who received a feeding tube during 2006-11. Results were weighted by enrollment in fee-for-service Medicare Parts A and B and/or time alive. We only counted feeding tube placements that occurred in beneficiaries who had at least two physician and/or two acute hospital dementia diagnoses and were also institutionalized for at least 90 days. (We began counting feeding tube placement after the date of institutionalization if it occurred before the second dementia diagnosis.)

*References*

Teno JM, Mitchell SL, Gozalo PL, Dosa D, Hsu A, Intrator O, et al. Hospital characteristics associated with feeding tube placement in nursing home residents with advanced cognitive impairment. JAMA : the journal of the American Medical Association. 2010;303(6):544-50. doi:10.1001/jama.2010.79

*ICD-9 Codes for Identifying Patients with Advanced Dementia*

| **Label** | **Code** |
| --- | --- |
| Dementias | 290 |
| Senile dementia, uncomplicated | 290.0 |
| Presenile dementia | 290.1 |
| Presenile dementia, uncomplicated | 290.10 |
| Presenile dementia with delirium | 290.11 |
| Presenile dementia with delusional features | 290.12 |
| Presenile dementia with depressive features | 290.13 |
| Senile dementia with delusion or depressive features | 290.2 |
| Senile dementia with delusional features | 290.20 |
| Senile dementia with depressive features | 290.21 |
| Senile dementia with delirium | 290.3 |
| Vascular dementia | 290.4 |
| Vascular dementia, uncomplicated | 290.40 |
| Vascular dementia with delirium | 290.41 |
| Vascular dementia with delusions | 290.42 |
| Vascular dementia with depressed mood | 290.43 |
| Alcohol induced persisting dementia | 291.2 |
| Dementia in conditions classified elsewhere | 294.1 |
| Dementia in conditions classified elsewhere without behavioral disturbance | 294.10 |
| Dementia in conditions classified elsewhere with behavioral disturbance | 294.11 |
| Alzheimer’s disease | 331.0 |
| Frontotemporal dementia | 331.1 |
| Pick's disease of the brain | 331.11 |
| Frontal dementia | 331.19 |
| Senile degeneration of the brain | 331.2 |
| Cerebral degeneration in dx classified elsewhere | 331.7 |
| Dementia with Lewy bodies / Parkinsonism | 331.82 |

*ICD-9 Codes for Identifying Feeding Tubes*

| **Label** | **Code** |
| --- | --- |
| Percutaneous endoscopic gastrostomy tube | 4311 |
| Permanent or temporary gastrostomy tube | 4319 |
| Endoscopic conversion of gastrostomy to J tube | 4432 |

*CPT Codes for Identifying Feeding Tubes*

| **Label** | **Code** |
| --- | --- |
| Direct placement of PEG endoscopically | 43246 |
| Laparoscopic surgical gastrostomy | 43653 |
| Gastrostomy tube placement | 43750 |
| Open gastrostomy without Stamm procedure | 43830 |
| Open gastrostomy with Janeway procedure | 43832 |
| Insertion of PEG tube | 44372 |
| Conversion of percutaneous G to J Tube | 44373 |
| Radiologist assistance in PEG | 74350 |
| Insertion of gastrostomy tube, percutaneous | 49440 |
| Insertion of duodenostomy or jejunostomy tube, percutaneous | 49411 |
| Conversion of gastrostomy tube to gastro-jejunostomy tube, percutaneous | 49446 |
| Replace G/C tube perc | 49450 |
| Replace Duod./Jej. tube perc | 49451 |
| Replace G-J tube perc | 49452 |
| Change gastrostomy tube | 43760 |
| Reposition gastrostomy tube | 43761 |

# Don’t use opioid or butalbital treatment for migraine, except as a last resort

*Choosing Wisely Guideline*

| **American Academy of Neurology** | Don’t use opioid or butalbital treatment for migraine except as a last resort. Opioid and butalbital treatment for migraine should be avoided because more effective, migraine-specific treatments are available. Frequent use of opioid and butalbital treatment can worsen headaches. Opioids should be reserved for those with medical conditions precluding the use of migraine-specific treatments or for those who fail these treatments. |
| --- | --- |

*Methods*
[truncated: 1,588 more chars]
